# 1 **Spatiotemporal dynamics of membrane surface charge regulates cell** 2 **polarity and migration**

3 Tatsat Banerjee<sup>1,2</sup>, Debojyoti Biswas<sup>3, ‡</sup>, Dhiman Sankar Pal<sup>1, ‡</sup>, Yuchuan Miao<sup>1,4</sup>, Pablo A.  
4 Iglesias<sup>3</sup>, Peter N. Devreotes<sup>1,4\*</sup>.

5  
6  
7 <sup>1</sup>Department of Cell Biology and Center for Cell Dynamics, School of Medicine, Johns Hopkins  
8 University, Baltimore, MD, USA.

9 <sup>2</sup>Department of Chemical and Biomolecular Engineering, Whiting School of Engineering, Johns  
10 Hopkins University, Baltimore, MD, USA.

11 <sup>3</sup>Department of Electrical and Computer Engineering, Whiting School of Engineering, Johns  
12 Hopkins University, Baltimore, MD, USA.

13 <sup>4</sup>Department of Biological Chemistry, School of Medicine, Johns Hopkins University, Baltimore,  
14 MD, USA.

15 <sup>‡</sup>These authors should be considered as co-second authors.

16 \*Email: [pnd@jhmi.edu](mailto:pnd@jhmi.edu).

## 17 18 19 20 21 **ABSTRACT**

22  
23 During cell migration and polarization, hundreds of signal transduction and cytoskeletal  
24 components self-organize to generate localized protrusions. Although biochemical and genetic  
25 analyses have delineated many specific interactions, how the activation and localization of so  
26 many different molecules are spatiotemporally orchestrated at the subcellular level has remained  
27 unclear. Here we show that the regulation of negative surface charge on the inner leaflet of the  
28 plasma membrane plays an integrative role in the molecular interactions. Surface charge, or zeta  
29 potential, is transiently lowered at new protrusions and within cortical waves of

1 Ras/PI3K/TORC2/F-actin network activation. Rapid alterations of inner leaflet anionic  
2 phospholipids, such as PI(4,5)P<sub>2</sub>, PI(3,4)P<sub>2</sub>, phosphatidylserine, and phosphatidic acid,  
3 collectively contribute to the surface charge changes. Abruptly reducing the surface charge by  
4 recruiting positively charged optogenetic actuators was sufficient to trigger the entire  
5 biochemical network, initiate *de novo* protrusions, and abrogate pre-existing polarity. These  
6 effects were blocked by genetic or pharmacological inhibitions of key signaling components  
7 such as Akt and PI3K/TORC2. Conversely, increasing the negative surface deactivated the  
8 network and locally suppressed chemoattractant-induced protrusions or subverted EGF-induced  
9 ERK activation. Computational simulations involving excitable biochemical networks  
10 demonstrated that slight changes in feedback loops, induced by recruitment of the actuators,  
11 could lead to outsized effects on system activation. We propose that key signaling network  
12 components act on, and are in turn acted upon, by surface charge, closing feedback loops which  
13 bring about the global-scale molecular self-organization required for spontaneous protrusion  
14 formation, cell migration, and polarity establishment.

## 15 **INTRODUCTION**

16

17 Cell migration and polarity involve large networks of interacting signal transduction and  
18 cytoskeletal components<sup>1-4</sup>. Several important features of these networks are emerging. First,  
19 there is an exquisite spatiotemporal coordination of the molecular events: For example, Ras,  
20 PI3K, and Rac activation along with actin polymerization define growing protrusions at the front  
21 of the cell while PTEN, RhoA, and myosin II leave these regions and return as the protrusions

1 are withdrawn. To the extent that it has been examined, this complementary organization is  
2 conserved during macropinocytosis, phagocytosis, cytokinesis, within traveling cortical waves in  
3 different cells throughout phylogeny, and in apical-basal polarity of epithelial cells<sup>5-7</sup>. Second,  
4 consistent with the network concept, multiple genetic, pharmacological, and mechanical  
5 perturbations on different individual components often result in surprisingly similar phenotypic  
6 changes suggesting that the overall “setpoint” of the network is more important than any single  
7 constituent<sup>8-19</sup>. Although much has been gained by studying detailed interactions between  
8 different molecules, a systems level explanation is needed to account for these emergent  
9 properties. It is possible that the features could be a result of a series of stepwise protein-protein  
10 interactions but it is more likely that the organization depends on a biophysical property of the  
11 plasma membrane<sup>20</sup>. Such global biophysical organizers have been suggested<sup>1, 11, 20</sup>, but  
12 properties that track closely with the observed dynamic spatial and temporal organization, or that  
13 allow small alterations to bring about dramatic shifts in the setpoint of the entire system causing  
14 outsized phenotypic effects, have not been identified.

15 One prospective candidate for a such a biophysical organizer is inner membrane surface charge  
16 or zeta potential. The cell maintains a negative charge on the inner leaflet of the plasma  
17 membrane, primarily by regulating the concentrations of multiple anionic phospholipids<sup>21-24</sup>. Of  
18 course, numerous studies have focused on specific protein interactions with individual lipids  
19 such as PIP3<sup>25, 26</sup> and many cytoskeletal proteins were reported to bear PI(4,5)P2 binding  
20 motifs<sup>27</sup>. Interestingly, it has been reported that enzymatic *lowering* of specific anionic lipids  
21 such as PI(4,5)P2 or PI(3,4)P2 can lead to the network *activation* and alterations in cell  
22 migration<sup>9, 28</sup>. Relatively few studies have focused on the role of membrane surface charge itself  
23<sup>21, 29</sup>. These have proposed that the zeta potential, in the range of -20 to -50 mV<sup>30-32</sup>, acts in

1 regulating local pH and soluble second messenger concentrations, altering ion channel  
2 conductance, and controlling the association of peripheral membrane proteins<sup>21-24, 33-36</sup>. It was  
3 also shown that the during immune synapse formation and phagocytosis, the membrane surface  
4 charge changes<sup>22, 37-39</sup>. However, it was not envisioned or assessed whether network activation  
5 and protrusion formation are associated with increases or decreases in surface charge or whether  
6 direct perturbations of surface charge can activate/deactivate the network.

7  
8 To address these questions, and to understand the possible role of surface charge as a biophysical  
9 organizer, we examined whether the surface charge profile changes during cell migration and  
10 polarity establishment and designed actuators to alter rapidly the surface charge in a particular  
11 domain of the membrane. Here, we first showed that PI(4,5)P2 and PI(3,4)P2,  
12 phosphatidylserine and phosphatidic acid are dynamically *lowered* during the *activation* of  
13 Ras/PI3k/Akt/F-Actin network. Based on these initial observations, we used a generic surface  
14 charge sensor to assess whether surface potential tracked with the activation process. We  
15 observed that the surface potential is high in resting cells and is transiently *lowered* during  
16 network *activation* and protrusion formation. Altering surface potential by recruiting our novel  
17 positively or negatively charged optogenetic actuators to the membrane in a spatiotemporally  
18 controlled fashion, we establish that the level of surface potential in a local membrane domain is  
19 not a consequence but sufficient and necessary for activation of the entire signal transduction  
20 network and directing migration and polarity phenotypes.

21

22

## 1 RESULTS

2

3

4 To analyze the organization of coordinated signaling and cytoskeletal activities, we started by  
5 examining protrusion formation in migrating *Dictyostelium* cells as well as cortical wave  
6 propagation in *Dictyostelium* and RAW 264.7 macrophage cells (Figures S1A-S1C). As  
7 previously noted<sup>3, 5, 26, 40</sup>, events that facilitate protrusion formation such as Ras/PI3K activation  
8 and actin polymerization localize to the front regions of migrating cells (Figures S1A and S1D),  
9 whereas those that suppress protrusions such as PTEN and myosin II localize to back (Figure  
10 S1E). An analogous complementarity was observed in the ventral wave patterns: the facilitative  
11 and suppressive components dynamically separate into broad, propagating “front-” and “back”-  
12 state regions, respectively (Figures S1F-S1I)<sup>6, 41-43</sup>. The waves have been shown to control  
13 protrusion dimensions and corresponding modes of cell migration, and thus serve as a useful  
14 surrogate for “front/back” polarity. To quantitate the extent of correspondence or  
15 complementarity between the distributions of a pair of different molecular components, we  
16 developed a conditional probability-based index or CP index (methods; Figures S2A and S2B)  
17 which was positive or negative, respectively, for co-localized versus complementary-localized  
18 pairs (Figures S2C and S2D). For most of the data, both normalized line scans and CP indexes  
19 are reported to provide quantitative measures of fractional changes in biosensor levels as well as  
20 the extent of complementarity.

21

1 **PI(4,5)P2, PI(3,4)P2, PS, and PA dynamically co-segregate to back-state regions of the**  
2 **membrane**

3

4 To gain insight into the spatiotemporal coordination among the signaling and cytoskeletal  
5 components, we examined several anionic phospholipids in the inner surface of the plasma  
6 membrane using genetically encoded biosensors. The distribution of PH<sub>PLC $\delta$</sub>  indicated that  
7 PI(4,5)P2 was depleted in the front-state regions of ventral waves and from protrusions in  
8 migrating *Dictyostelium* cells (Figures 1A and 1B; Video S1). Equivalent patterns of PI(4,5)P2  
9 were observed in macrophage ventral waves (Figure 1C; Figure S3A; Video S1), as previously  
10 reported<sup>44, 45</sup>. The PI(3,4)P2 biosensor, PH<sub>CynA</sub>, displayed a similar pattern in the *Dictyostelium*  
11 ventral waves (Figure 1D; Figure S3B; Video S2), consistent with our previous reports of its  
12 depletion from the protrusions<sup>28, 46</sup>. Line scans showed around 40-70% less PI(4,5)P2 and  
13 PI(3,4)P2 in front versus back regions of the waves. The consistently high negative values of CP  
14 indices for PI(4,5)P2 and PI(3,4)P2 showed that the complementarity with respect to PIP3 was  
15 maintained during the dynamic patterning (Figures 1E and 1F).

16

17 Since these two signaling lipids segregated to the back-state regions of the membrane, we  
18 wondered whether other major anionic phospholipids, such as phosphatidylserine (PS) and  
19 phosphatidic acid (PA), exhibit asymmetric patterns. We studied the spatiotemporal  
20 distributions of PS, which accounts for ~20% of inner leaflet lipids<sup>47</sup>, using its biosensor LactC2  
21 <sup>47, 48</sup>. Similar to PI(4,5)P2 and PI(3,4)P2, PS localized to the back-state regions of ventral waves  
22 of *Dictyostelium* (Figure 1G; Figure S3C; Video S3) and RAW 264.7 macrophages (Figure 1H;  
23 Figure S3D; Video S3) and was depleted from protrusions in migrating *Dictyostelium* cells

1 (Figure 1I). Using the biosensor Spo20<sup>49,50</sup>, we observed that PA preferentially distributed to the  
2 back-state regions of the ventral waves (Figure 1J; Figure S3E) and away from protrusions in  
3 migrating *Dictyostelium* cells (Figure S3F). Line scans showed around 30-50% less PS and PA in  
4 front versus back regions of the waves. The CP indices of PS and PA were also computed with  
5 respect to PIP3 (Figures 3K and 3L) and were found to be consistently negative, similar to  
6 PI(4,5)P2, PI(3,4)P2, and PTEN (Figure S3G). Taken together, these observations show that four  
7 major anionic lipids decrease in the front-state region of the membrane while PIP3 increases.  
8 While PIP3 carries the most negative charge, it is a minor constituent<sup>47, 51-53</sup>.

9  
10 **Higher negative surface charge defines the inactive region or “back-state” regions of the**  
11 **cell cortex**

12  
13 Reasoning that, with respect to charge, the decreases in the four predominant anionic  
14 phospholipids would more than offset any increases in PIP3, we sought to measure  
15 spatiotemporal changes in membrane surface charge. We started with a generic membrane  
16 surface charge sensor, R(+8)-Pre, which had been quantitatively characterized *in vitro* (by  
17 liposome binding assays) to detect the combination of anionic lipids<sup>22, 30, 54</sup>. Consistent with our  
18 observations of the individual lipids, we found that the back-state regions of cortical waves in  
19 *Dictyostelium* cells are defined by high negative surface charge whereas the front-state regions  
20 shun the charge sensor (Figure 2A; Video S4). Line scans demonstrated around 40-60% less  
21 charge sensor in front versus back regions of the waves (Figure 2A). Despite continuous  
22 propagation of front-region waves, as marked by PIP3, R(+8)-Pre faithfully maintained a  
23 preferential back-state localization (Figure 2B). Similarly, protrusions on migrating cells were

1 depleted of charge sensor compared with the higher basal level on the membrane (Figure 2C;  
2 Video S4). An analogous spatiotemporal distribution of surface charge was also observed in the  
3 ventral waves of mammalian RAW 264.7 macrophage-like cells (Figures 2D and 2E; Video S5).  
4  
5 Importantly, as previously reported for patterns of signal transduction events such as PIP3  
6 accumulation and PTEN dissociation (Figure S1H)<sup>42, 43</sup>, the dynamic distribution of surface  
7 charge was relatively independent of the actin cytoskeleton. In Latrunculin A-treated cells where  
8 periodic circulating waves were induced, the charge sensor continuously adjusted its localization  
9 towards the back-state during 12 minutes of observation (Figures 2F and 2G). It has been  
10 previously shown that cells exposed to a steady cAMP gradient, even when they are Latrunculin  
11 A treated, following a brief global response, display a crescent of front-region markers toward  
12 the high side of the gradient due to receptor-mediated activation of signaling events<sup>55, 56</sup>. As  
13 shown in Figure 2H and Figure S4A, when *Dictyostelium* cells were exposed to a chemotactic  
14 gradient, the charge sensor consistently moved away from the front region crescent and  
15 accumulated at the back. We quantified the complementarity between charge sensor and PIP3 in  
16 terms of CP index; in all these scenarios, the extent of complementary was found to be  
17 comparable to established back protein, PTEN (Figure 2I; Figure S2D).  
18  
19 These asymmetric distributions depended on charge and not on the specific amino acid  
20 sequences of the sensor. As the positively charged arginines of the charge sensor were  
21 sequentially replaced with neutral glutamines (Table S1), the distribution became increasingly  
22 uniform over the cortex (Figures 2J-2L; Figures S4B-S4F). The dynamics of R(+2)-Pre sensor  
23 (Figures 2J and 2K; Figures S4D and S4F) resembled the uniform distribution of surface receptor



1 cAR1 (Figures S4G and S4H), the weakly charged lipidated sequence of LYN (Figures S4I), and  
2 the uncharged lipidated C-terminal tail of HRas (Figure 2M; Figures S4J), as quantified in terms  
3 of CP indices (Figures 2L, 2N, and 2O). In contrast, two distinct polybasic sequences, PTEN<sub>1-18</sub>-  
4 CAAX and RacG<sub>CT</sub> (Table S1), carrying +6 and +7 charges, respectively, displayed a  
5 complementarity to front sensor in ventral waves and protrusions, which was roughly correlated  
6 with their net amount of charge (Figures S5A-S5G). All these data collectively suggest that,  
7 under various physiological scenarios, such as in protrusions in migrating cells, in activated  
8 crescents of Latrunculin A treated cells, and in activated regions of propagating ventral waves,  
9 the front-state of the membrane maintains a lower negative surface charge, compared to the  
10 back-state (Figure 2P).

11

## 12 **Anionic lipids contribute to the surface charge in an integrative manner**

13

14 As multiple anionic lipids decreased during the activated phase, we tested whether any single  
15 phosphoinositide fully accounted for the asymmetric distribution of the surface charge sensor.  
16 When we rapidly depleted PI(4,5)P<sub>2</sub> by recruiting Inp54p to the membrane, PH<sub>PLC $\delta$</sub> , moved to  
17 the cytosol (Figure 3A; Figure S6A), as expected. However, R(+8)-Pre remained membrane  
18 bound (Figures 3B and 3C). As previously published<sup>9, 57</sup>, upon PI(4,5)P<sub>2</sub> depletion, the cells  
19 switched migration mode and displayed increased velocity (Figure 3D; Figures S6B and S6C).  
20 Correspondingly, the front- and back- state regions expanded and contracted, respectively.  
21 Nevertheless, R(+8)-Pre still faithfully localized to the back-state of the cortex (Figure 3E).  
22 Similarly, in *Dictyostelium Dd5p4<sup>-</sup>* cells, where PI(3,4)P<sub>2</sub> levels are low, front regions are  
23 expanded, and migration is also altered<sup>28</sup>, R(+8)-Pre remained on the membrane (Figures S6D

1 and S6E) and maintained its characteristic distribution to the remaining back-state regions of the  
2 cell (Figure 3F). To be certain that membrane retention of surface charge sensor following  
3 recruitment of Inp54p was not due to its binding to the product PI4P, we recruited pseudojanin  
4 by a similar chemically induced dimerization system. This particular chimera of INPP5E and  
5 *sac1* was reported to be sufficient to simultaneously convert PI(4,5)P2 to PI4P and PI4P to PI<sup>58</sup>.  
6 As expected, we found that upon recruitment of pseudojanin from cytosol to membrane,  
7 PI(4,5)P2 sensor PH<sub>PLC $\delta$</sub>  moved to cytosol (Figure 3G and Video S6) and so did PI4P-specific  
8 sensor PHOsh2X2 (Figure 3H and Video S6). However, almost all of the R(+8)-Pre remained on  
9 the membrane (Figures 3I and 3J; ; Video S7). Together, these results demonstrate that the  
10 dynamic regulation of the membrane surface charge depends on PI(4,5)P2 and PI(3,4)P2, but  
11 there are additional key contributors, such as PS and PA, for example.

12  
13 We sought a possible mechanism for the local decreases of PS on activated regions of inner  
14 membrane since it is not readily modified by kinase/phosphatases like the phosphoinositides.  
15 Reversible flipping of PS in non-apoptotic conditions has been previously reported in several  
16 physiological contexts such as cytosolic calcium release and immunological stimulation<sup>59, 60</sup>.  
17 However, despite multiple speculations over the years<sup>22, 47</sup>, whether rapid and dynamic  
18 externalization can regulate local decreases in PS pertinent to signaling and cytoskeleton  
19 activation has not been shown. We performed a transient Annexin-V binding assay (see methods  
20 for details) to label outer leaflet PS during protrusion formation. Remarkably, we found that, on  
21 the outer leaflet, PS strongly localizes to the protrusion or front-state regions(Figure 3K), closely  
22 opposing its inner leaflet localization (Figure 1G-1I). We confirmed that in quiescent cells where  
23 protrusions were absent, Annexin V did not bind to outer leaflet (Figure S6F). Pearson's

1 correlation coefficient analysis demonstrates that extent of co-localization of front-state or  
2 protrusion marker LimE and Annexin V is very similar to the extent of co-localization of two  
3 standard front-state makers such as PH<sub>Crac</sub> and RBD (Figure 3L) and significantly different than  
4 standard complementary pair such as PH<sub>Crac</sub> and PTEN (Figure 3L). Obviously, more studies  
5 will be required, but our data here suggest that inner leaflet PS may transiently flips to outer  
6 leaflet in the membrane domains where the biochemical network is activated or where  
7 protrusions form.

8

9 As explained earlier, in the inner leaflet of the membrane, PI(3,4,5)P<sub>3</sub> is present at negligible  
10 amounts compared to other anionic phospholipids<sup>47, 51-53</sup> and theoretically, it can perform its  
11 well-known signaling functions without significant contribution to surface charge<sup>52</sup>.

12 Nevertheless, we directly tested the contribution of PIP<sub>3</sub> to the membrane surface charge profile  
13 using genetic and pharmacological perturbations. First, we treated the cells with LY294002, a  
14 potent inhibitor of PI3K<sup>61-64</sup>, which resulted in a loss of PIP<sub>3</sub> accumulation in the protrusions  
15 (Figure 3M). Yet, the typical depletion of the surface charge sensor from the protrusions was  
16 largely unchanged (Figure 3M). Second, we used *Dictyostelium PI3K 1<sup>-</sup>/2<sup>-</sup>* cells where PIP<sub>3</sub>  
17 production is severely impaired<sup>62, 65</sup>. Observing the surface charge sensor profile in those cells  
18 with respect to different front-state events such as F-actin polymerization (Figure 3N) and Ras-  
19 activation (Figure 3O), we again found that negative surface charge is consistently lowered  
20 during signaling and cytoskeletal network activation, irrespective of PI(3,4,5) levels. These  
21 results demonstrate that PIP<sub>3</sub> does not significantly contribute to the membrane surface charge.

22

1 **Decrease in net membrane surface potential is sufficient to trigger protrusions and**  
2 **abrogate the pre-existing polarity**

3  
4 The coordinated regulation of generic surface charge suggests that it is a key integrator of signal  
5 transduction and cytoskeletal networks. Previously, the spatiotemporal behavior of these  
6 networks has been modeled as an excitable network consisting of positive and delayed negative  
7 feedback loops<sup>9, 57, 66-69</sup>. Independent studies suggest that the delayed negative feedback loop  
8 required for excitability includes the action of substrates of AKTs and possibly other refractory  
9 state molecules<sup>57, 70</sup>. The positive feedback was implemented as a mutually inhibitory interaction  
10 between front and back states, consisting of Ras/Rap and PI(4,5)P2 or PI(3,4)P2, respectively<sup>9,</sup>  
11<sup>28, 57</sup>. Our data suggest that, while decreases in specific lipids can be effective activators,  
12 mutually inhibitory positive feedback loop may be controlled by overall surface charge (Figure  
13 4A). In this scenario, the activated state would decrease negative charge while decreasing  
14 negative charge would lead to activation. Having demonstrated the former, we next sought to  
15 assess whether directly perturbing the negative surface charge on the membrane could alter the  
16 strength of the loop and thereby affect protrusion formation, polarity organization, and migratory  
17 behavior.

18  
19 To this end, we developed two non-specific biophysical optogenetic actuators designed to  
20 acutely increase or decrease the negative surface potential profile. Unlike previously reported  
21 actuators that were developed based on specific components such as GEFs, GAPs, RGS, or  
22 kinases/phosphatases<sup>71-75</sup>, these unique actuators, consisting of a short chain of charged amino  
23 acids, are not directed at any particular biochemical reaction.

1  
2 The first actuator, designated Opto-ACTU+, had positive charge of +16 (Figure 4B). We  
3 anticipated that when recruited from cytosol to the membrane in a spatially restricted fashion  
4 (Figure 4C; Figure S7A), it would reduce the negative surface charge and thereby increase  
5 positive feedback (Figure 4A). As a result, the threshold of the excitable networks would be  
6 lower, the probability of spontaneous firing would increase, and consequently, the cell would  
7 generate more protrusions *de novo*. Indeed, when Opto-ACTU+ was recruited to a quiescent  
8 back region of a polarized *Dictyostelium* cell, new protrusions started forming nearby (Figure  
9 4D; Figure S7B; Video S8), in a remarkably similar fashion as previously obtained by specific  
10 biochemical perturbations such as optical activation of Rac1, Cdc42, or the GPCR opsins<sup>76-78</sup>.  
11 With recruitment of uncharged Opto-CTRL new protrusions rarely appeared near the irradiation  
12 area (Figures S7C and S7D; Video S8), indicating that the protrusion formation is due to the  
13 negative surface charge reduction and not light irradiation or cryptochrome recruitment. As the  
14 angular histograms demonstrate, the probability of new protrusion generation was highest in the  
15 vicinity of the Opto-ACTU+ recruitment (Figure 4E) whereas Opto-CTRL recruitment did not  
16 induce a consistent bias (Figure S7E).

17  
18 We anticipated that when Opto-ACTU+ is globally recruited from cytosol to membrane in  
19 polarized cells, more protrusions would be generated, and polarity would be disrupted. Indeed,  
20 within few minutes of global recruitment of Opto-ACTU+, cells began to rapidly extend  
21 protrusions all along the cortex (Figures 4F and 4G; Video S9), including from domains of  
22 erstwhile back-states. Consequently, polarity was abrogated (Figure 4H) and migration was  
23 impaired (Figures 4I and 4J). The number of new protrusions increased around 2.5 fold (Figure

1 4K) which is consistent with amount of surface charge reduction (Supplementary Note 1;  
2 methods). The entire series of events was reversible: When the 488 nm laser was turned off, the  
3 Opto-ACTU+ returned to the cytosol, cells repolarized and resumed polarized migration (Figure  
4 4L; Video S10). No consistent changes in polarity, migration, or protrusion formations were  
5 observed upon the recruitment of uncharged control Opto-CTRL (Figures S8A and S8B; Video  
6 S9), as quantified in terms of cell circularity index (Figure S8C), speed (Figures S8D and S8E),  
7 and protrusion formation frequency (Figures S8F).

8  
9 Careful observation revealed that in addition to more protrusion formation induced by the  
10 recruitment of the Opto-ACTU+, a series of events was occurring: As new protrusions/front-state  
11 regions established, recruited Opto-ACTU+ was quickly moving away from these regions  
12 (Figures 4F and 4G; Video S9). In other words, once recruited, Opto-ACTU+ accumulated in a  
13 back-state region, it triggered a protrusion there, and subsequently translocated away,  
14 presumably due to the decreased negative surface charge in these regions. It gradually  
15 accumulated inside the newly formed back region and the entire cycle was repeated multiple  
16 times (Figure S8G).

17

18

19 **The effects of surface charge alteration on migration and polarity are mediated by**  
20 **signaling and cytoskeleton network components**

21

22 To investigate the molecular mechanism through which membrane surface charge acts, we  
23 employed a series of genetically encoded biosensors, different pharmacological and genetic  
24 perturbations, in conjunction with our optogenetic actuators (Figure 5A). First, when Opto-

1 ACTU+ was recruited, it accumulated to the existing back-state regions of the cortex and actin  
2 polymerization was eventually initiated there (Figure 5B). We observed that Opto-ACTU+  
3 accumulation in a specific domain of the membrane consistently preceded the F-actin  
4 polymerization (Figure 5B; Figures S9A and S9B). Moreover, after formation of a newly  
5 polymerized actin-based protrusion, Opto-ACTU+ quickly moved away (Figure S9A) and  
6 accumulated to the newly forming back which, again, gradually started F-actin polymerization  
7 that led to protrusion (Figures 5B and Figure S9B). Next, we monitored the activation and  
8 localization kinetics of different signaling molecules upon surface charge perturbation, which are  
9 upstream regulators of F-actin based membrane protrusions. We started with PTEN, an  
10 established back-protein. The first 18 amino acids of PTEN, which were reported to be essential  
11 for membrane binding<sup>79, 80</sup>, when lipidated are sufficient to localize to the back-state region of  
12 the cortex, presumably due to its +6 charge (Figures S5B, S5D, and S5F; Table S1). We  
13 speculated that when Opto-ACTU+ would be recruited and accumulated to a domain of the  
14 membrane, surface charge would be lowered there, and as a result, owing to the charge-sensitive  
15 domain, PTEN would dissociate from that particular domain. Indeed, localization of Opto-  
16 ACTU+ to a spatially confined region within the back-state region of the membrane consistently  
17 caused a dissociation of PTEN from that region (Figure 5C and Figure S9C). Such  
18 spatiotemporally regulated loss of PTEN contributed to a dynamic accumulation of PI(3,4,5)P3  
19 inside those transient Opto-ACTU+ enriched domains (Figures S9D and S9E). Since Ras  
20 superfamily GTPases are considered to activate PI3K (resulting in PI(3,4,5)P3 production) and  
21 TORC2 (Figure 5A), we tested whether Ras was activated upon surface charge lowering. Using  
22 an RBD biosensor that indicates the GTP-bound state of Ras, we found that Ras was dynamically

1 activated in the surface charge lowered regions throughout the time course of the experiment  
2 (Figure 5D and Figure S9F).  
3  
4 Next, we sought to modify different nodes of Ras/PI3K/TORC2/Akt/F-Actin network using  
5 different genetic knockouts and drug treatments to interfere with the Opto-ACTU<sup>+</sup>-mediated  
6 increased protrusion formation and consequent loss of polarity and migration speed (Figure 5A).  
7 First, to investigate the role of PTEN in the signaling network activation, we performed Opto-  
8 ACTU<sup>+</sup> recruitment experiment in *pten*<sup>-</sup> *Dictyostelium* cells which have elevated PIP3 levels  
9 and exhibits impaired migration profile and higher protrusion numbers<sup>79, 81, 82</sup>. We observed that  
10 recruitment of Opto-ACTU<sup>+</sup> in developed *pten*<sup>-</sup> cells was sufficient to induce even more  
11 frequent protrusion formation (Figure 5E; Figure S10A) which resulted severely impaired  
12 migration profile (Figure 5F; Figures S10B and S10C). We next tested the effects of reduced  
13 PIP3 level by pre-treating *Dictyostelium* cells with the PI3K inhibitor LY294002<sup>61-64</sup>. PI3K  
14 inhibition only slightly inhibited the Opto-ACTU<sup>+</sup> recruitment driven migration phenotypic  
15 changes: cells still made more protrusions (Figure 5E; Figure S10D) and thus migrated less  
16 (Figure 5F; Figure S10E). To confirm that the membrane surface charge perturbation mediated  
17 signaling and cytoskeleton network activation are not merely dependent on PTEN or PIP3-  
18 centric mechanisms, we treated the *pten*<sup>-</sup> cells with LY294002 and then performed Opto-  
19 ACTU<sup>+</sup> recruitment. We found that, even when both PTEN and PI3K activity are impaired, cells  
20 consistently displayed increased activity in terms of protrusion formation (Figure 5E; Figure  
21 S10F), migrated slowly (Figure 5F; Figures S10G and S10H), and the polarity was abrogated  
22 (Figure S10I and Video S11), upon Opto-ACTU<sup>+</sup> recruitment. Similarly, standalone inhibition  
23 of TORC2 by PP242<sup>9, 83</sup> could only slightly hinder the Opto-ACTU<sup>+</sup> recruitment driven



1 migration phenotype changes (Figures 5E and 5F; Figures S10J and S10K), compared to  
2 untreated condition (Figures 5E and 5F; Figures 4J and 4K). On the other hand, inhibition of  
3 both PI3K and TORC2 by the cocktail of LY294002 and PP242 almost completely blocked the  
4 change in migration speed and protrusion formation (Figures 5E and 5F; Figures S10L and  
5 S10M). It is well established that the activities of PI3K and TORC2 converge to activate AKT  
6 and AKT-related kinase, PKBR1, that together activate numerous regulators of cytoskeleton<sup>9, 62</sup>,  
7 <sup>63</sup>. Since AKT and PKBR1 act in a redundant fashion in different physiological scenarios<sup>62</sup>, we  
8 used *Akt*<sup>-</sup>/*PKBR1*<sup>-</sup> *Dictyostelium* cells to study the effects of surface potential perturbation. We  
9 observed that in these cells, Opto-ACTU+ recruitment did not induce any significant changes  
10 either in terms of protrusion formation rate (Figure 5E; Figure S10N) or migration mode (Figure  
11 5F; Figure S10O). Together, these findings suggest that surface charge-mediated changes in  
12 migration or protrusion formation acts via the collective action of Ras/PI3K/TORC2/AKT/F-  
13 Actin network.

14

### 15 **Simulations of actuators dynamics in excitable network capture the phenotypic changes** 16 **resulting from global and local lowering of surface charge**

17

18 To simulate these unique polarity breaking and protrusion formation phenomena, we  
19 incorporated separate actuator dynamics into a model of the excitable network that includes  
20 polarity<sup>84</sup> (methods; Figures 6A-6C). Prior to perturbing the system with the actuators, polarity  
21 biased the excitable network, resulting in persistently localized firings which underlie the  
22 protrusions (Figure 6D). Following simulated recruitment, Opto-ACTU+ lowered the threshold  
23 and caused abrupt increases in overall activity along the whole perimeter. With the development

1 of each front-state region, Opto-ACTU+ quickly distributed to new back-state regions where it  
2 reduced the local threshold, resulting in triggering of new protrusions (Figure 6D). As in  
3 experiments, this cycle repeated multiple times. The reversibility of this actuation process was  
4 also recreated in the simulations by allowing the actuators to dissociate from the membrane  
5 (Figures S11A and S11B). We also simulated the selective protrusion formation by confining the  
6 recruitment of our actuator within a back region and observed increased activity there which  
7 resulted a switch in polarity and, as the actuator was consistently cleared out from the activated  
8 area (Figure 6F). Together, these results suggest that, during polarized cell migration, higher  
9 negative surface charge at the back of the cell lead to an increased threshold which prevents  
10 protrusion formation there.

11

## 12 **Spatially confined elevation of surface charge is sufficient suppress protrusions locally**

13

14 Since reducing negative surface charge was able to activate the signaling network, we asked  
15 whether direct elevation of negative surface charge could deactivate the network and thereby  
16 limit protrusions (Figure 7A). To test this idea, we designed a second optogenetic peptide, Opto-  
17 ACTU-, with net negative charge of -14 that is expected to quickly increase the negative surface  
18 charge on the membrane upon recruitment (Figure 7B). We chose mammalian macrophage-like  
19 RAW 264.7 cells that are generally unpolarized and quiescent but can be globally activated by  
20 C5a receptor agonist so that they make protrusions all along the membrane. We first recruited  
21 Opto-ACTU- to a region on the membrane to increase negative surface charge locally and then  
22 globally stimulated the cell with C5a receptor agonist (Figure 7C). Protrusions formed along the  
23 membrane except in the vicinity of Opto-ACTU- recruitment region (Figure 7D; Figure S12A;

1 Video S12). This induced a polarity in the cell and the cell migrated away (Figure 7D; Figure  
2 S12A; Video S12). Thus, selective surface charge manipulation can produce migration patterns  
3 that resemble those previously elicited by direct perturbations of the signaling and cytoskeletal  
4 network components<sup>8, 17, 85</sup>. Compared to Opto-ACTU- (Figure 7E), local recruitment of  
5 uncharged Opto-CTRL could not suppress protrusions upon global agonist stimulation (Figure  
6 S12B; Video S12) and the probability of protrusion formation remained uniform (Figure S12C).  
7 In simulations, we first elevated the threshold locally mimicking Opto-ACTU- recruitment and  
8 superimposed a global reduction of threshold representing the addition of receptor agonist  
9 (Figure S12D). We found increased activity except where the local suppression was enforced  
10 (Figure 7F, Figure S12E).

11

12

### 13 **Global increase in membrane surface charge is sufficient to subvert EGF induced ERK** 14 **activation in epithelial cells**

15

16 We next asked whether increasing negative surface potential on the membrane can override the  
17 EGF receptor mediated activation of ERK since the pathway involves activation of Ras (Figure  
18 7G). Mammary epithelial cells, MCF10A, were first activated with a saturating dose of EGF,  
19 which was confirmed by the predominantly cytosolic distribution of ERK activation sensor  
20 ERK-KTR (Figure 7H first time point; Figure S12F first time point, Video S13). When we raised  
21 the negative surface charge of the membrane by globally recruiting Opto-ACTU- (Figure 7G), a  
22 substantial fraction of ERK-KTR became nuclear, indicating a deactivation of ERK (Figure 7H;

1 Video S13), whereas control Opto-CTRL recruitment caused no visible effect (Figure S12F;  
2 Video S13). Quantitation of multiple cells showed that, although there were fluctuations of ERK  
3 activity (Figures S12G and S12H), Opto-ACTU- recruitment provoked ~50% increase in  
4 nucleus/cytosol ratio of KTR, compared to uncharged control (Figure 7I).

## 6 **DISSCUSSION**

7  
8 Our study demonstrates that negative surface charge on the inner leaflet of the plasma membrane  
9 spatiotemporally coordinates the components of the Ras/PI3K/TORC2/F-actin network that  
10 control cell migration and polarity. We show that, under physiological conditions, the levels of  
11 phosphoinositides PI(4,5)P2 and PI(3,4)P2 as well phosphatidylserine and phosphatidic acid on  
12 the inner membrane decrease during network activation at membrane protrusions and front-state  
13 regions on ventral surfaces of cells. These changes collectively account for a major reduction in  
14 membrane surface charge or zeta potential which serves to integrate the signal transduction  
15 events in those activated regions. Altering membrane surface charge is necessary and sufficient  
16 for network activation and, not a merely a consequence of it, since recruiting a positively  
17 charged actuator to the membrane activates the network whereas recruiting a negatively charged  
18 actuator prevents the chemoattractant or growth factor stimulated activation. Our results suggest  
19 that inner membrane surface charge is a key biophysical parameter that appears within the  
20 feedback loops that determines the set-point of these networks.

21

1 Our data suggest that the fluid-mosaic model of the membrane is more complex than it is  
2 originally envisioned. We find that the inner leaflet of the plasma membrane is constantly  
3 remodeling in a highly coordinated manner. Large patches of multiple anionic lipids and  
4 peripheral membrane proteins co-segregate into defined “phase” domains which propagate  
5 dynamically. In the case of the phosphoinositides and many of the peripheral membrane proteins,  
6 the propagation is not due to lateral translocation but rather a sequential transient biochemical  
7 modification of headgroups of the lipids and shuttling of the proteins<sup>68, 86, 87</sup>. Many of the  
8 enzymes that modify the headgroups of phosphoinositides have been identified and for a handful  
9 of cases, their specific activation cascade is known. For example, PIP3 levels on the membrane  
10 increases when PI3K is activated by Ras<sup>88, 89</sup> as well as when PTEN level decreases<sup>81, 90</sup>.  
11 However, in-depth future studies will be needed to determine which specific kinases and  
12 phosphatases are activated or inhibited in sequence to control the levels of PI(4,5)P2, PI(3,4)P2  
13 or PA in membrane. Additionally, as our data suggest, the regulation of PS is possibly regulated  
14 by dynamic externalization and hence we anticipate that several flippases, floppases, and  
15 scramblases whose activation tracks closely with Ras/PI3K/TORC2/F-Actin network activation  
16 and which co-segregate in front or back-state phase, will be identified in future.

17

18 The optogenetic actuators we developed allowed us to alter inner membrane surface charge in a  
19 generic fashion, inside an intact live cell, in a spatiotemporally restricted fashion. Thus, this  
20 induced, biophysical change, i.e. a reduction in zeta potential, sets in motion a series of  
21 biochemical events that were previously shown to be involved in migration, protrusion  
22 formation, and polarity. Despite its implications, such an effect of surface charge perturbation on  
23 different signaling and cytoskeletal events was hitherto largely unexplored, primarily due to

1 dearth of available tools to directly perturb inner membrane surface charge. Traditional  
2 approaches with isolated membranes<sup>29, 31, 37, 91-94</sup> or giant unilamellar vesicle (GUV)/liposome or  
3 charged surfactant usually cannot accurately mimic the physiological environment of the cell due  
4 to incorrect lipid compositions, lack of counterions, and/or compromised inner leaflet integrity.  
5 Other recent methods<sup>22, 24, 47, 52</sup>, such as phosphoinositide degradation/synthesis by chemically  
6 induced dimerization or pharmacological perturbations to increase cytosolic cation  
7 concentrations or cellular ATP depletion do not provide any spatial control. Moreover, these  
8 approaches do not decouple the surface charge from other cell physiological changes.  
9 Optogenetics do provide spatial and temporal control inside intact live cells, but most have been  
10 engineered to directly change the biochemical activity and/or localization of one particular  
11 network component<sup>71, 72, 75</sup>.all of those were engineered to directly change the biochemical  
12 activity and/or localization of one particular network component. As far as we know, the  
13 synthetic optogenetic systems we have developed here are the first to assess the effect of  
14 standalone surface charge perturbation *in situ*. Since these novel actuators can work orthogonally  
15 to external cues such as chemoattractant gradients or external electric field, we envision that  
16 these can potentially help in developing more in-depth molecular architecture of receptor  
17 mediated biochemical network activation. We anticipate that in different physiological scenarios  
18 such as immune synapse formation and phagocytosis where surface charge remodeling has been  
19 reported (and others that likely will be found in the future), our tools will enable unique  
20 perturbation strategies that can reveal intricate coordination pattern.

21

22 Our study establishes negative surface potential as an organizer of signal transduction and  
23 cytoskeletal events that control cell migration and polarity. We suggest the term “action surface

1 potentials” to describe the traveling membrane domains of transiently decreased negative surface  
2 charge. We observed that high negative surface charge corresponds to a “resting” or back-state  
3 of the membrane while the regions of decreasing surface charge are transitioning to an  
4 active/front-state which leads to protrusions. We envision that, as surface charge decreases,  
5 molecules that regulate the signaling activities respond differentially to charge. Further studies  
6 are needed to determine which other crucial network components may be directly regulated by  
7 charge. We speculate that these changes in turn initiate downstream events which mediate further  
8 loss of multiple anionic lipids in the front regions and possibly other events, additionally  
9 decreasing the membrane surface charge. This arrangement constitutes a positive feedback loop  
10 that enables small fluctuations such as a small initial drop in zeta potential to expand into  
11 propagating waves and can have outsized phenotypic effects. This situation would be analogous  
12 to the ability of transmembrane potential to regulate key ion channels which in turn regulates  
13 transmembrane potential during action potential propagation.

14  
15 The “action surface potential” hypothesis can explain a series of heretofore puzzling  
16 observations: First, as we discussed, in most signal transduction networks a vast number of  
17 activities undergo a highly coordinated stereotypical transient response. This extraordinary  
18 degree of coordination within an extensive series of stepwise interactions could be facilitated if  
19 the regulation of key components depended on an organizer such as the surface charge. Second,  
20 cells expend significant energy to sustain an asymmetric distribution of anionic lipids on inner  
21 leaflet of the membrane, which has little apparent structural advantage. Of course, PIP2 serves as  
22 a substrate for PLC and PI3K and PS as a signal for apoptosis. However, we suggest that  
23 another, perhaps larger, role of this asymmetric distribution of charged lipids is to help in setting

1 up a basal state for triggering of action surface potentials which involve changes in multiple  
2 lipids acting in a common direction. Third, the excitable nature of the action surface potentials  
3 enables global control over cytoskeletal activities and underlies oscillations for frequency control  
4 of gene expression. The lateral propagation of the waves along the cortex in more or less  
5 circular patterns provide form and dimension to protrusions. Recent reports highlight that  
6 travelling waves of cytoskeletal and signaling activities mediate a diverse range of cell  
7 physiological processes in different kinds of cells and organisms<sup>13, 68, 69, 86, 95-100</sup>. Our results  
8 imply that action surface potential likely contribute to spatiotemporally orchestrating these  
9 events.

10

11 **Acknowledgments:** We thank S. Grinstein (Hospital for Sick Children/University of Toronto)  
12 for helpful discussions. We are grateful to M. Kozlov (Tel Aviv University) for helping us with  
13 resident charge calculation. We thank all members of Devreotes and Iglesias laboratories as well  
14 as members of D. Robinson and M. Iijima laboratories (Johns Hopkins University School of  
15 Medicine) for valuable suggestions. We are grateful to Y. Long and Y. Deng (Devreotes lab) for  
16 helping with some experiments. We would like to thank N. Gautam (Washington University  
17 School of Medicine in St. Louis), O. D. Weiner (UCSF), and R. R. Kay (MRC LMB) for  
18 providing cells. We thank G. Du (McGovern Medical School, UTHealth) and A. Müller-  
19 Taubenberger (LMU Munich) for sharing plasmids. We thank Addgene and dictyBase for  
20 providing all the plasmids and resources. This work was supported by NIH grant R35  
21 GM118177 (to P.N.D.), DARPA HR0011-16-C-0139 (to P.A.I. and P.N.D.), AFOSR MURI  
22 FA95501610052 (to P.N.D.), as well as NIH grant S10 OD016374 (to S. Kuo of the JHU  
23 Microscope Facility).

24

25 **Author contributions:** T.B. and P.N.D. conceptualized the overall study. T.B. designed and  
26 performed all *Dictyostelium* experiments. D.S.P. introduced the mammalian culture and T.B.  
27 and D.S.P. together designed and carried out the mammalian experiments. Y.M. provided



1 resources and contributed to the experiments. D.B. and P.A.I. developed the software to  
2 compute the conditional probability index and performed localization analysis. T.B. quantified  
3 and analyzed other results, with inputs from other authors. D.B. and P.A.I. developed the  
4 computational models and D.B. conducted all the simulations. T.B., P.N.D., D.S.P., D.B., and  
5 P.A.I. wrote the manuscript. Second authors are listed alphabetically. P.N.D. and P.A.I.  
6 supervised the study.

7

8 **Competing interests:** Authors declare no competing interests.

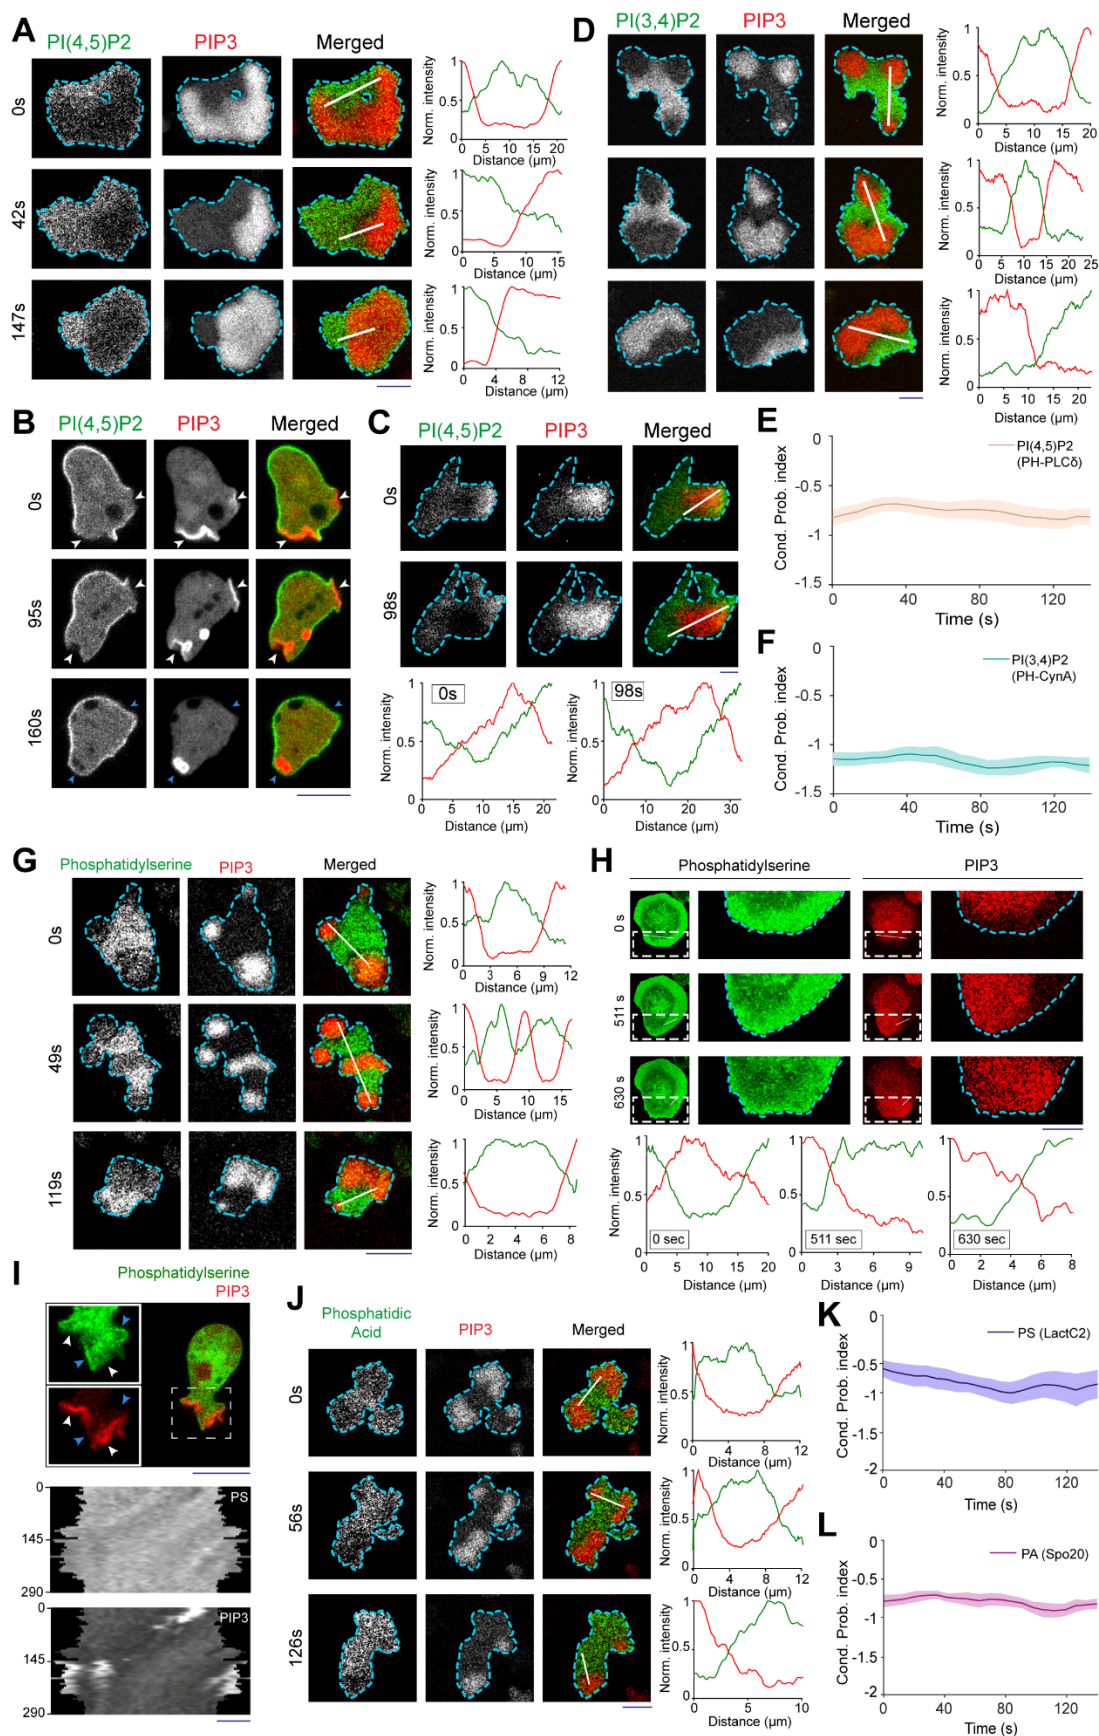

1 **Figure 1. Multiple anionic phospholipids dynamically self-organizes to the back-state**  
2 **regions of the membrane. (A and B)** Representative live-cell images of *Dictyostelium* cells co-  
3 expressing PI(4,5)P2 sensor PH<sub>PLC $\delta$</sub> -GFP and PI(3,4,5)P3 sensor PH<sub>Crac</sub>-mCherry, during ventral  
4 wave propagation (A) or migration (B). Note that PH<sub>PLC $\delta$</sub>  dynamically localizes to the back-state  
5 regions in ventral waves (A) and analogously moved away from protrusions in migrating cells  
6 (B). White arrows point to protrusions where PIP3 is enriched and PI(4,5)P2 sensor PH<sub>PLC $\delta$</sub>  is  
7 depleted whereas blue arrows point to PH<sub>PLC $\delta$</sub>  returning back to the membrane as protrusions  
8 were eventually retracted and membrane domain returned to its basal back-state (B). (C)  
9 Representative live-cell time-lapse images of RAW 264.7 macrophage co-expressing PI(4,5)P2  
10 sensor GFP-PH<sub>PLC $\delta$</sub>  and PI(3,4,5)P3 sensor PH<sub>Akt</sub>-mCherry demonstrating dynamic  
11 complimentary distribution in its ventral waves. (D) Representative live-cell time-lapse images  
12 of *Dictyostelium* cells co-expressing PI(3,4)P2 sensor PH<sub>CynA</sub>-KikGR and PIP3 sensor,  
13 demonstrating the spatiotemporal back localization of PI(3,4)P2 in its ventral waves.  
14 Corresponding linescans are displaying the intensity profile quantification in (A), (C), and (D).  
15 (E and F) Time series plot of CP index for PI(4,5)P2 (E) and PI(3,4)P2 (F). For all CP index  
16 time-plots in this paper, each of the  $n_c$  cells was analyzed for  $n_f=20$  frames and all CP indices  
17 are calculated with respect to PIP3. PI(4,5)P2:  $n_c=16$  cells; PI(3,4)P2:  $n_c=11$  cells; data are mean  
18  $\pm$  SEM. (G-I) Dynamic back-state distribution of PS biosensor, GFP-LactC2, in ventral waves of  
19 *Dictyostelium* (G) and RAW 264.7 macrophages (H), and away from protrusions in migrating  
20 *Dictyostelium* cells (I). Protrusions and front-state regions of ventral waves are marked by PIP3  
21 sensors. Bottom two panels of (I) show 360° membrane-kymographs around cell perimeter. (J)  
22 Complementary localization of PA sensor, GFP-Spo20, and PIP3 in *Dictyostelium* ventral waves.  
23 (K and L) Quantification of extent of back localization of PS and PA by time-series plot of CP

- 1 index of LactC2 (K;  $n_f=20$  frames for each  $n_c=15$  cells) and Spo20 (L;  $n_f=20$  frames for each
- 2  $n_c=16$  cells); mean  $\pm$  SEM. For all figures, scale bars are 10  $\mu\text{m}$ .

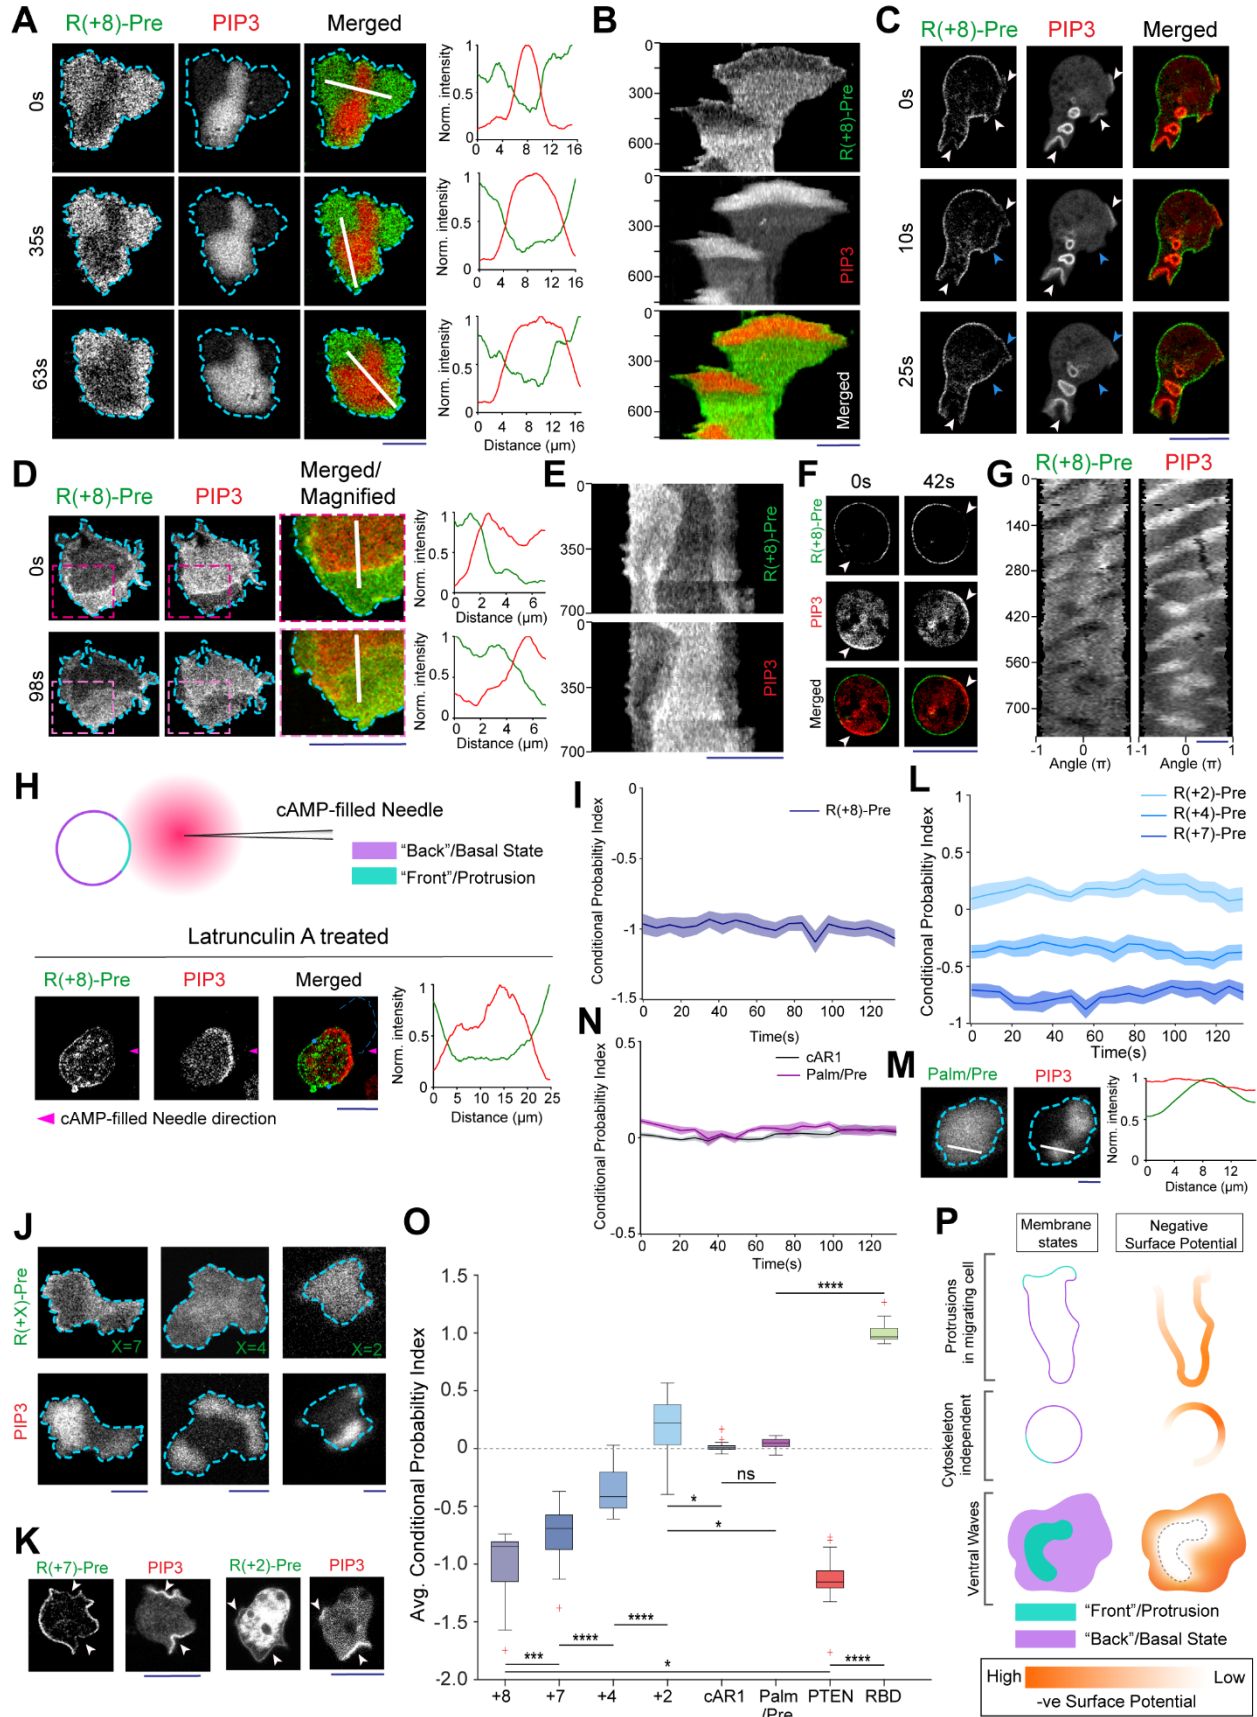

1 **Figure 2. Back-state of the membrane maintains higher negative surface charge on the**  
2 **inner leaflet, compared to the front-state of the membrane. (A)** Representative live-cell time-  
3 lapse imaging of a *Dictyostelium* cell co-expressing GFP-R(+8)-Pre and PIP3 biosensor, PH<sub>Crac</sub>-  
4 mCherry. **(B)** Representative line-kymograph of wave pattern shown in cell (A), showing the  
5 consistency of complementary localization of R(+8)-Pre and PIP3. In all kymographs, numbers  
6 on the left denote time in seconds, unless otherwise mentioned. **(C)** Live-cell time-lapse imaging  
7 of migrating *Dictyostelium* cell showing R(+8)-Pre is depleted in protrusions. White arrows:  
8 PIP3 enriched protrusion; Blue arrows: Retracted protrusions where PIP3 was depleted and  
9 R(+8)-Pre returned. **(D)** Ventral waves in RAW 264.7 macrophage cells co-expressing GFP-  
10 R(+8)-Pre and PIP3 biosensor, PH<sub>Akt</sub>-mCherry, displaying analogous complementary kinetics of  
11 the surface charge sensor with respect to PIP3. **(E)** Representative line-kymograph of wave  
12 pattern shown in cell (D), showing the consistency of the complementary localization. **(F and G)**  
13 Actin-polymerization inhibitor Latrunculin A treated *Dictyostelium* cells exhibiting the  
14 spatiotemporal surface charge gradient, complementary to PIP3. In (F), white arrows denote  
15 front-state consisting of bright patches PIP3 and depleted of surface charge sensor; (G) displayed  
16 the consistency of complementarity in a 360° membrane-kymograph around the periphery of the  
17 cell. **(H)** R(+8)-Pre was showing complementary localization with respect to front-state marker  
18 PIP3 during receptor activation mediated PIP3 production using chemotactic gradient  
19 stimulation. Magenta arrowhead indicates the direction of micropipette (filled with 1 μM  
20 cAMP) for gradient stimulation. Note that PIP3 was produced in the part of the membrane which  
21 is closer to the micropipette. Cells were pre-treated with Latrunculin A. **(I)** Time series plot of  
22 CP index of R(+8)-Pre, n<sub>c</sub>=30 cells; data are mean ± SEM. **(J)** Representative live-cell images of  
23 ventral waves in *Dictyostelium* cell membrane co-expressing PIP3 biosensor, PH<sub>Crac</sub>-mCherry,

1 and GFP-R(+7)-Pre (left), GFP-R(+4)-Pre (middle), GFP-R(+2)-Pre (right). **(K)** Representative  
2 live-cell images showing R(+7)-Pre and R(+4)-Pre distribution, with respect to PIP3-rich  
3 protrusions, in migrating cells. **(L)** Time series plot of CP indices of mutated surface charge  
4 sensors R(+7)-, R(+4)-, R(+2)-Pre. +7:  $n_c = 23$ , +4:  $n_c = 20$ , +2:  $n_c = 12$  cells; data are mean  $\pm$   
5 SEM. **(M)** GFP-Palm/Pre is exhibiting uniform distribution in ventral waves, whereas PIP3  
6 sensor PH<sub>Crac</sub>-mcherry is enriched in front-state regions. **(N)** Time series plot of CP indices of  
7 uniform membrane-markers cAR1 and Palm/Pre; cAR1:  $n_c = 20$ , Palm/Pre:  $n_c = 11$ , data are mean  
8  $\pm$  SEM. **(O)** Time averaged CP indices of surface charge sensors, uniform membrane marker  
9 controls, standard back protein PTEN ( $n_c = 17$ ), and front sensor RBD ( $n_c = 15$ ). To generate each  
10 datapoint,  $n_f = 20$  frames were averaged over these number of cells( $n_c$ ). Box and whiskers are  
11 graphed using Tukey's method. The p-values determined by Mann-Whitney-Wilcoxon test. **(P)**  
12 Schematic of negative surface potential distribution in front and back state of the cell during  
13 migration and cortical wave propagation.

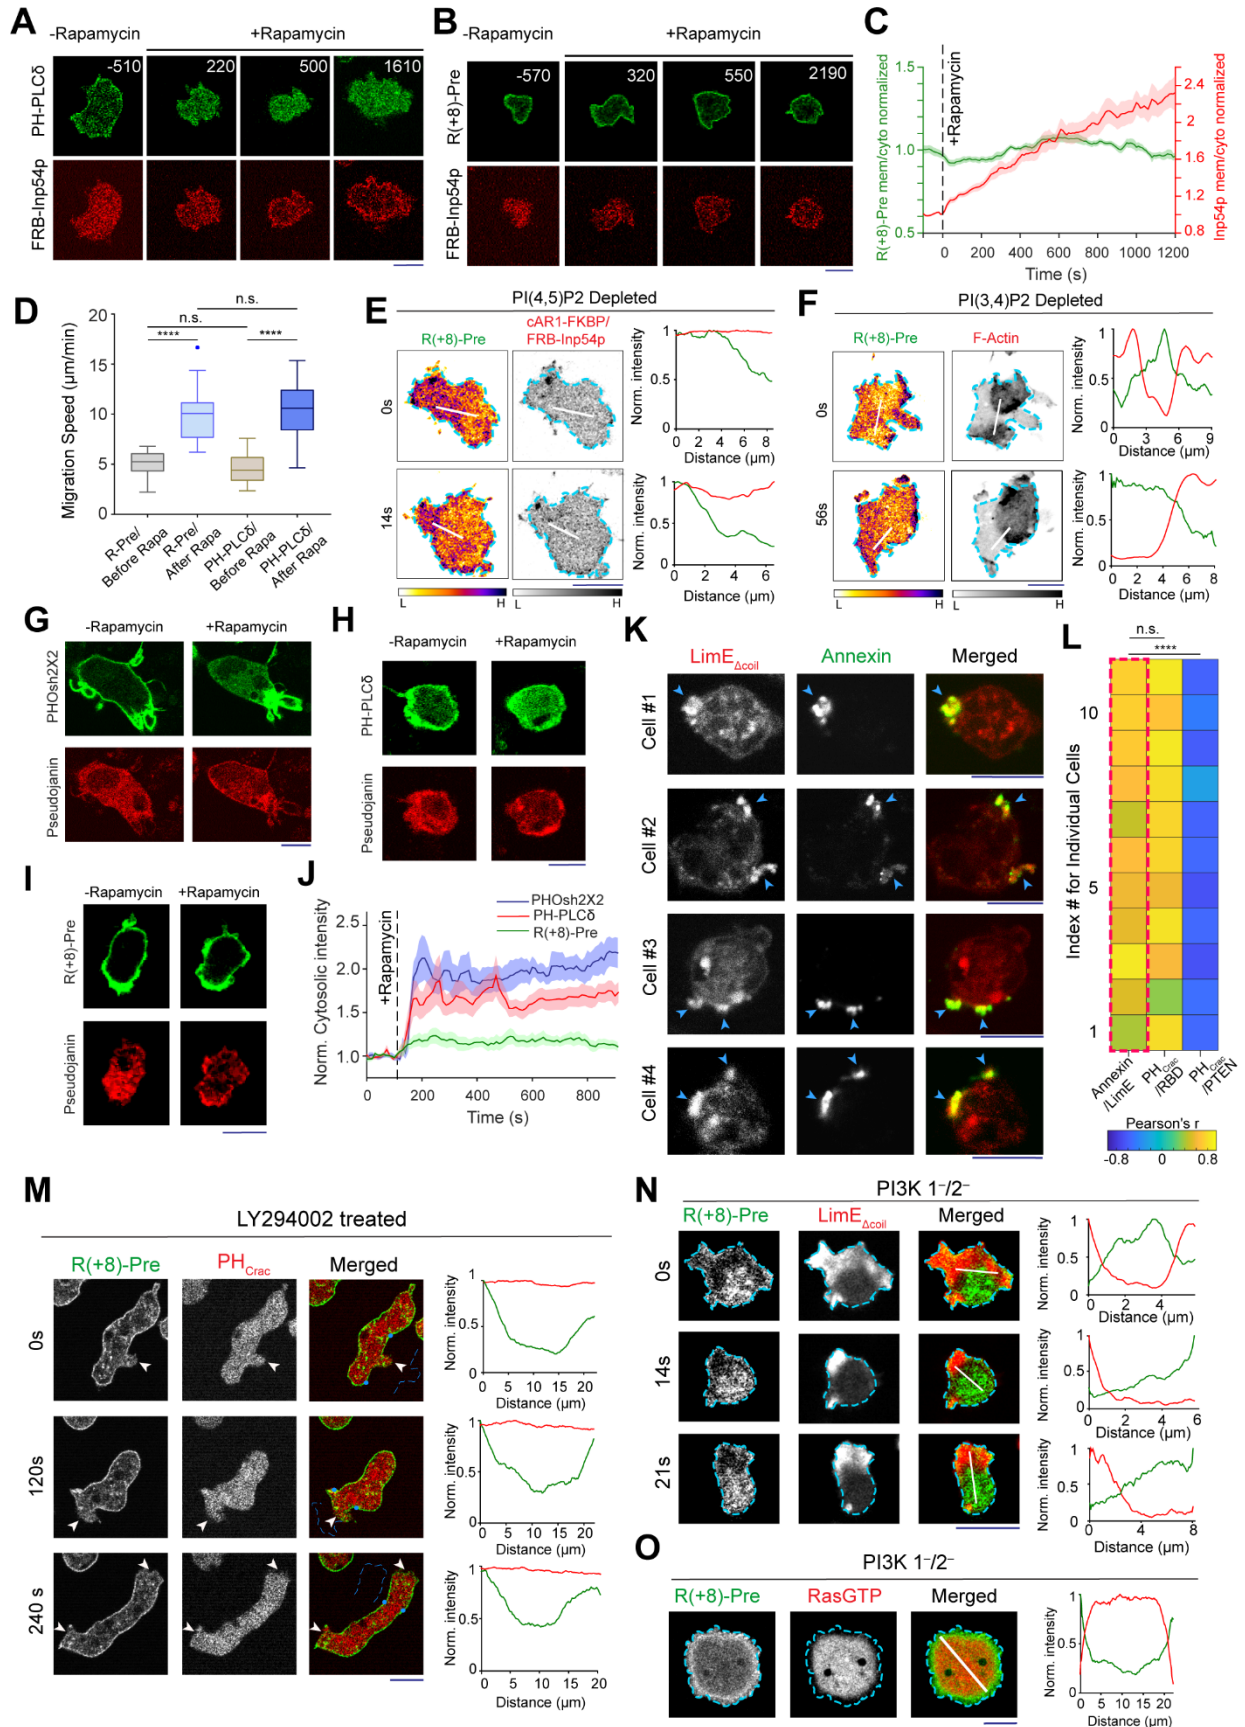



1 **Figure 3. Dynamics of inner membrane surface charge sensor R(+8)-Pre in different**  
2 **anionic phospholipid depleted cells. (A and B)** Representative live-cell time-lapse images  
3 showing the dynamics of membrane localization of PH<sub>PLC $\delta$</sub> -GFP (A) or GFP-R(+8)-Pre (B),  
4 before and after PI(4,5)P<sub>2</sub> depletion in *Dictyostelium* cells, co-expressing the chemically induced  
5 dimerization system i.e. cAR1-FKBP and mCherry-FRB-Inp54p. Numbers indicate time in  
6 seconds; rapamycin added at 0s. **(C)** Time course of membrane-to-cytosol ratio of R(+8)-Pre  
7 and Inp54p upon rapamycin addition (indicated by black dashed vertical line), demonstrating  
8 R(+8)-Pre did not dissociate from membrane upon PI(4,5)P<sub>2</sub> depletion;  $n_c=20$  cells; mean  $\pm$   
9 SEM. **(D)** Migration speed of cells, co-expressing CID system for PI(4,5)P<sub>2</sub> depletion, along  
10 with either GFP-R(+8)-Pre or PH<sub>PLC $\delta$</sub> -GFP, before and after rapamycin addition;  $n_c=32$  cells  
11 tracked for  $n_f=60$  frames (7s/frame) for each case; p-values by Mann–Whitney–Wilcoxon test.  
12 **(E)** Spatiotemporal back localization of R(+8)-Pre in PI(4,5)P<sub>2</sub> depleted cells, shown in “fire  
13 invert” colormap of Fiji/ImageJ; Inp54p recruited to uniform membrane-anchor cAR1 is  
14 symmetric in ventral waves. **(F)** Complementary localization of R(+8)-Pre with respect to front  
15 marker LimE (biosensor for newly-polymerized F-Actin) in ventral waves of Dd5p4<sup>-</sup>  
16 *Dictyostelium* cells. **(G-I)** Representative live-cell images of RAW 264.7 macrophages showing  
17 the membrane localization profile of PI4P biosensor PHOsh2X2-GFP(G), PI(4,5)P<sub>2</sub> biosensor  
18 PH<sub>PLC $\delta$</sub> -GFP (H), or GFP-R(+8)-Pre (I), before and after recruiting Pseudojanin to membrane  
19 anchor Lyn-FRB. **(J)** Time course of normalized cytosolic intensity of PHOsh2X2, PH<sub>PLC $\delta$</sub> , and  
20 R(+8)-Pre, upon rapamycin addition; time of addition is indicated by black dashed vertical line;  
21  $n_c=16$  cells for PHOsh2X2,  $n_c=10$  cells for PH<sub>PLC $\delta$</sub> ,  $n_c=12$  cells for R(+8)-Pre; mean  $\pm$  SEM. **(K)**

1 Representative examples of protrusion forming *Dictyostelium* cells expressing LimE $_{\Delta\text{coil}}$ -GFP,  
2 whose outer leaflet of membrane was allowed to transiently bind with Annexin V. (L) Heatmap  
3 of Pearson correlation coefficient between Annexin V and LimE $_{\Delta\text{coil}}$  (leftmost column, shown  
4 with dashed red line). Pearson correlation coefficient between (PH $_{\text{Crac}}$  and RBD) and (PH $_{\text{Crac}}$  and  
5 PTEN) are shown to demonstrate standard Co- and counter- localization profiles. All correlation  
6 coefficients were calculated along cell membrane;  $n_c=11$  cells in each case; p-values by Mann-  
7 Whitney-Wilcoxon test. (M) Representative live-cell time-lapse images of migrating  
8 *Dictyostelium* cell co-expressing GFP-R(+8)-Pre and PIP3 sensor PH $_{\text{Crac}}$ -mCherry which was  
9 treated with PI3K inhibitor LY294002. White arrows: protrusions which were depleted of PIP3  
10 (due to LY294002 treatment), yet maintained surface charge gradient. (N and O) Representative  
11 live-cell time-lapse images of ventral waves in *PI3K I<sup>-1/2-</sup>* *Dictyostelium* cells co-expressing  
12 GFP-R(+8)-Pre and front-state marker LimE (N) or RBD (O), demonstrating surface charge  
13 sensor is dynamically distributing to the back-state regions of the membrane.

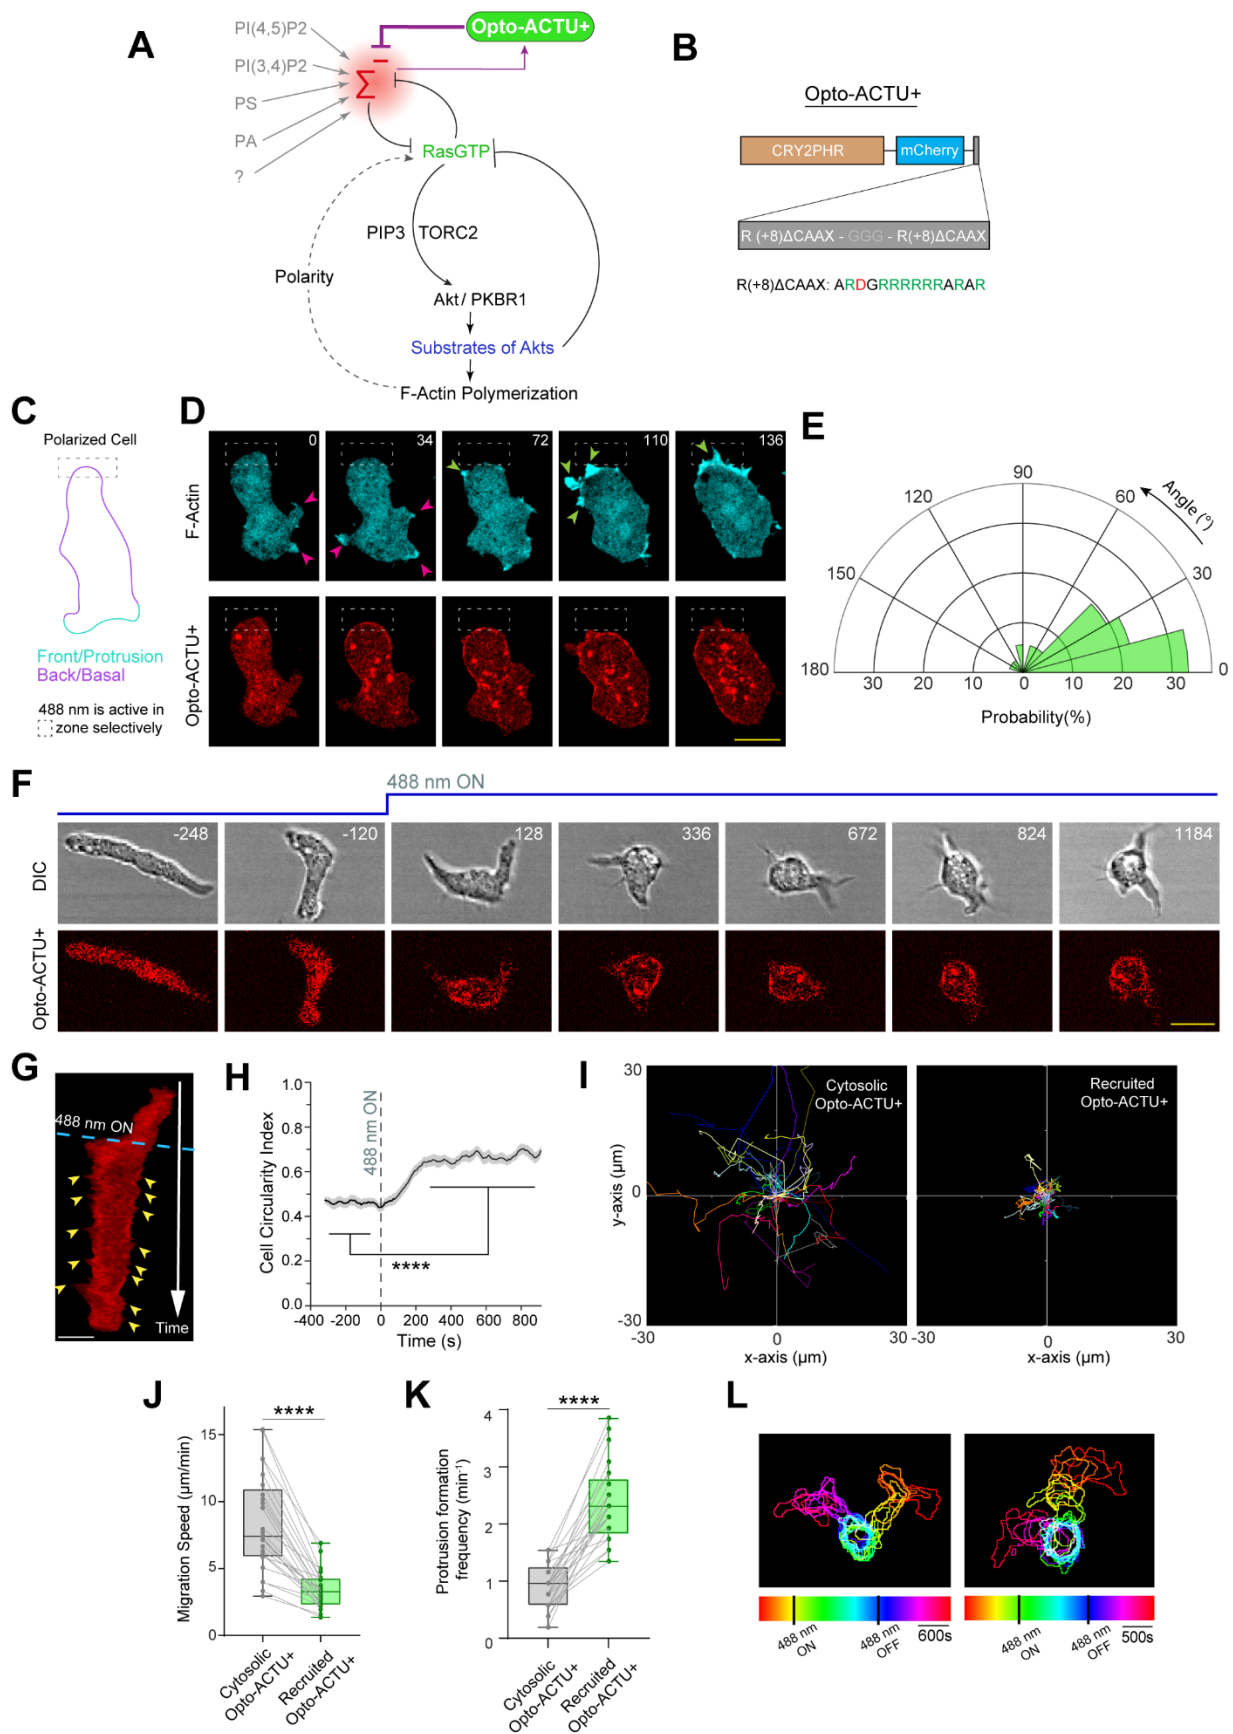

1 **Figure 4. Lowering negative surface charge on the membrane can trigger *de novo***  
2 **generation of protrusions and can abolish the pre-existing polarity. (A)** Scheme for lowering  
3 negative surface charge by the recruitment of positively-charged optogenetic-actuator, Opto-  
4 ACTU+, in context of biochemical excitable network topology.  $\Sigma^-$ : back-state defined by  
5 overall negative surface charge. Opto-ACTU+ interfere into the topology by getting associated  
6 with  $\Sigma^-$ , but in turn it provides a negative feedback to  $\Sigma^-$ . **(B)** Design of Opto-ACTU+ with net  
7 charge +16. Positively-charged amino acids in green, negatively-charged amino acids in red. **(C)**  
8 Setup of selective optical recruitment at the back of polarized *Dictyostelium* cells. **(D)**  
9 Representative time-lapse images of selective *de novo* protrusion formation from the area of  
10 recruitment in *Dictyostelium* cells co-expressing Opto-ACTU+, cAR1-CIBN, and LimE-Halo.  
11 Dashed rectangle shows the area where 488 nm laser was selectively illuminated for recruitment.  
12 Magenta and green arrows show existing and newly induced protrusions, respectively. Time in  
13 seconds. **(E)** Polar histogram of angle of protrusion formation with respect to recruitment area,  
14 demonstrating the higher probability of protrusion formation near the area of recruitment;  $n_c=23$   
15 cells,  $n_p=36$  protrusions. **(F and G)** Time-lapse snapshots (F) and time-stack (G) demonstrating  
16 cell morphology and migration mode changes in a polarized *Dictyostelium* cell, upon recruitment  
17 of Opto-ACTU+. Cells were co-expressing Opto-ACTU+ and cAR1-CIBN. Numbers are time in  
18 seconds. 488 nm laser switched ON *globally* at  $t=0s$ . Yellow arrowheads: newly generated  
19 protrusions. Note that Opto-ACTU+ is depleted in the protrusions. **(H-K)** Quantification of cell  
20 morphology and migration mode changes in terms of cell circularity index (H), cell tracks (I),  
21 migration speed (J), and new protrusion formation frequency (K) upon Opto-ACTU+ recruitment  
22 ( $n=25$  cells). Polarity loss shown as mean  $\pm$  SEM over time (H). In (I-K), for either before or  
23 after recruitment, each cell tracked for  $n_f=40$  frames (8 sec/frame was the image acquisition

1 frequency). Tracks were reset to the same origin in (I). For pairwise comparison, tracks are  
2 color-coded in (I) and data from same cell are connected by gray lines in (J) and (K). **(L)** Two  
3 representative examples of temporally color-coded cell outlines showing cell morphology and  
4 migratory mode before 488nm was turned on, during 488nm kept on, and after 488nm was  
5 switched off. All p-values by Mann-Whitney-Wilcoxon test.

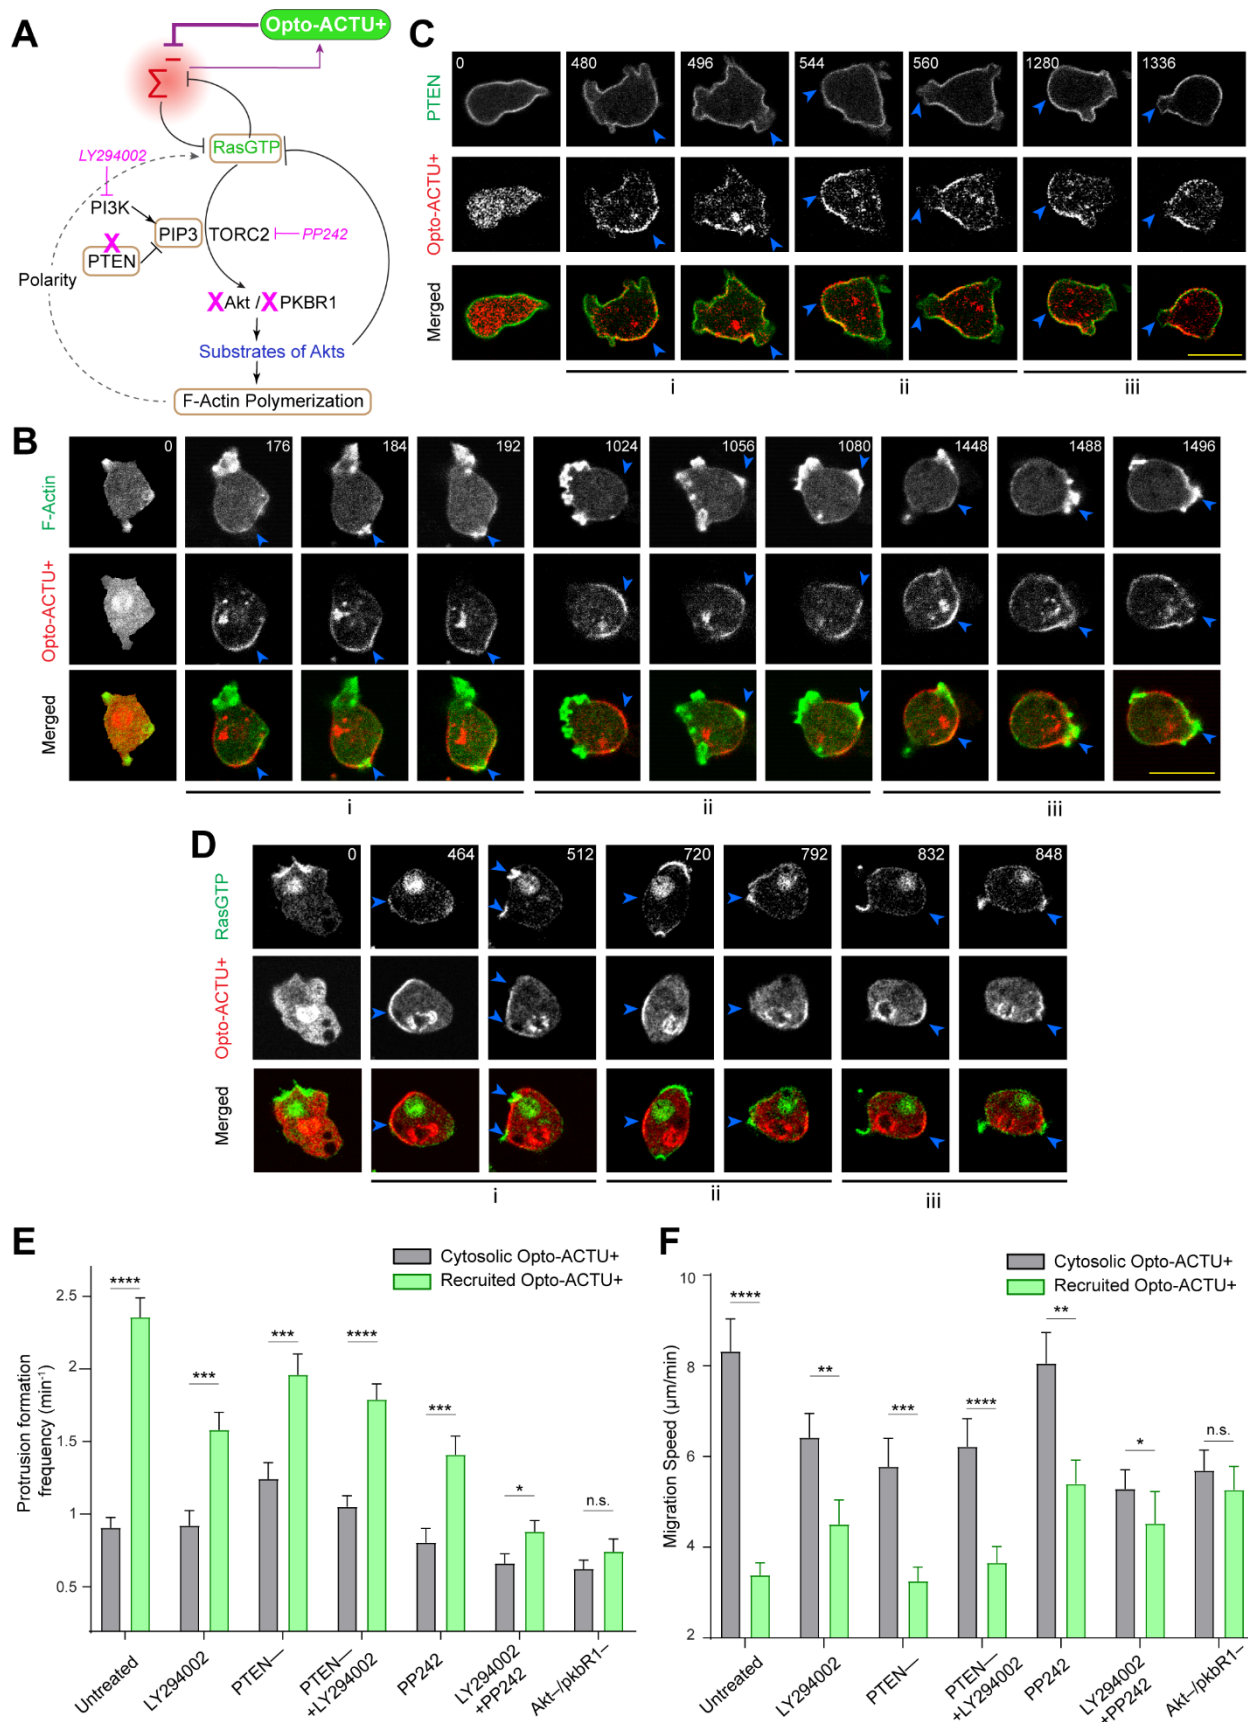

1 **Figure 5. The phenotypic changes induced by Opto-ACTU+ recruitment are mediated by**  
2 **the Ras-PI3K/Akt/TORC2/F-actin network. (A)** Scheme showing nodes of signaling and  
3 cytoskeletal network that were monitored and/or perturbed, in conjunction with Opto-ACTU+  
4 recruitment. Tan-colored rectangles denote the molecules whose dynamics were recorded.  
5 Magenta blocked arrows denote pharmacological inhibitions and magenta cross-marks denote  
6 genetic knockouts. **(B)** Time-lapse live cell images of *Dictyostelium* cells co-expressing Opto-  
7 ACTU+, cAR1-CIBN, and LimE-GFP (biosensor for newly polymerized F-actin), where  
8 recruitment was started at t=0s (first time point). Throughout this figure, numbers on images  
9 show time in seconds. The “i”, “ii”, “iii” are showing three representative actin polymerization  
10 cases. For each case, three events are shown: first, Opto-ACTU+ accumulated inside a domain of  
11 the membrane; second, F-actin polymerization was initiated there; and finally, when that domain  
12 fully turned into front state, Opto-ACTU+ moved away from that domain. Throughout this  
13 figure, blue arrowheads in are showing the domains of interest, i.e. where Opto-ACTU+ was first  
14 accumulated. **(C)** Time-lapse live cell images of *Dictyostelium* cells co-expressing Opto-  
15 ACTU+, cAR1-CIBN, and PTEN-GFP, where recruitment was started at t=0s (first time point).  
16 The “i”, “ii”, “iii” are showing three representative cases of PTEN dissociation from the  
17 membrane. For each case, two events are shown: first, the accumulation of recruited Opto-  
18 ACTU+ inside a domain of the membrane and second, when that resulted in the dissociation of  
19 PTEN from that particular domain of the membrane which also caused Opto-ACTU+ to move  
20 away from there. **(D)** Time-lapse live cell images of *Dictyostelium* cells co-expressing Opto-  
21 ACTU+, cAR1-CIBN, and RBD-GFP (biosensor for activated Ras), where recruitment was  
22 started at t=0s (first time point). The “i”, “ii”, “iii” are showing three representative cases of  
23 PTEN dissociation from the membrane. For each case, two events are shown: first, the

1 accumulation of recruited Opto-ACTU<sup>+</sup> inside a domain of the membrane and second, when that  
2 resulted in the activation of Ras inside that particular domain of the membrane which also caused  
3 Opto-ACTU<sup>+</sup> to move away from there. **(E and F)** Quantification of phenotypic changes upon  
4 Opto-ACTU<sup>+</sup> recruitment in terms of new protrusion formation frequency (E) and migration  
5 speed (F), in presence of different pharmacological inhibitors or genetic knockouts. Untreated:  
6  $n_c = 28$  cells; LY294002:  $n_c = 28$  cells; PP242:  $n_c = 22$  cells; PTEN<sup>-</sup>:  $n_c = 22$  cells; PTEN<sup>-</sup>+  
7 LY294002:  $n_c = 24$  cells; LY294002+PP242:  $n_c = 27$  cells; Akt<sup>-</sup>/PKBR1<sup>-</sup> double knockout:  $n_c =$   
8 21 cells. For each case, each of the  $n_c$  cells were tracked for  $n_f = 40$  frames (8 sec/frame was  
9 imaging frequency) and time averages were taken. The mean  $\pm$  SEM are shown. For pairwise  
10 comparison and more detailed data, please see Figures S10. The p-values by Mann-Whitney-  
11 Wilcoxon test.



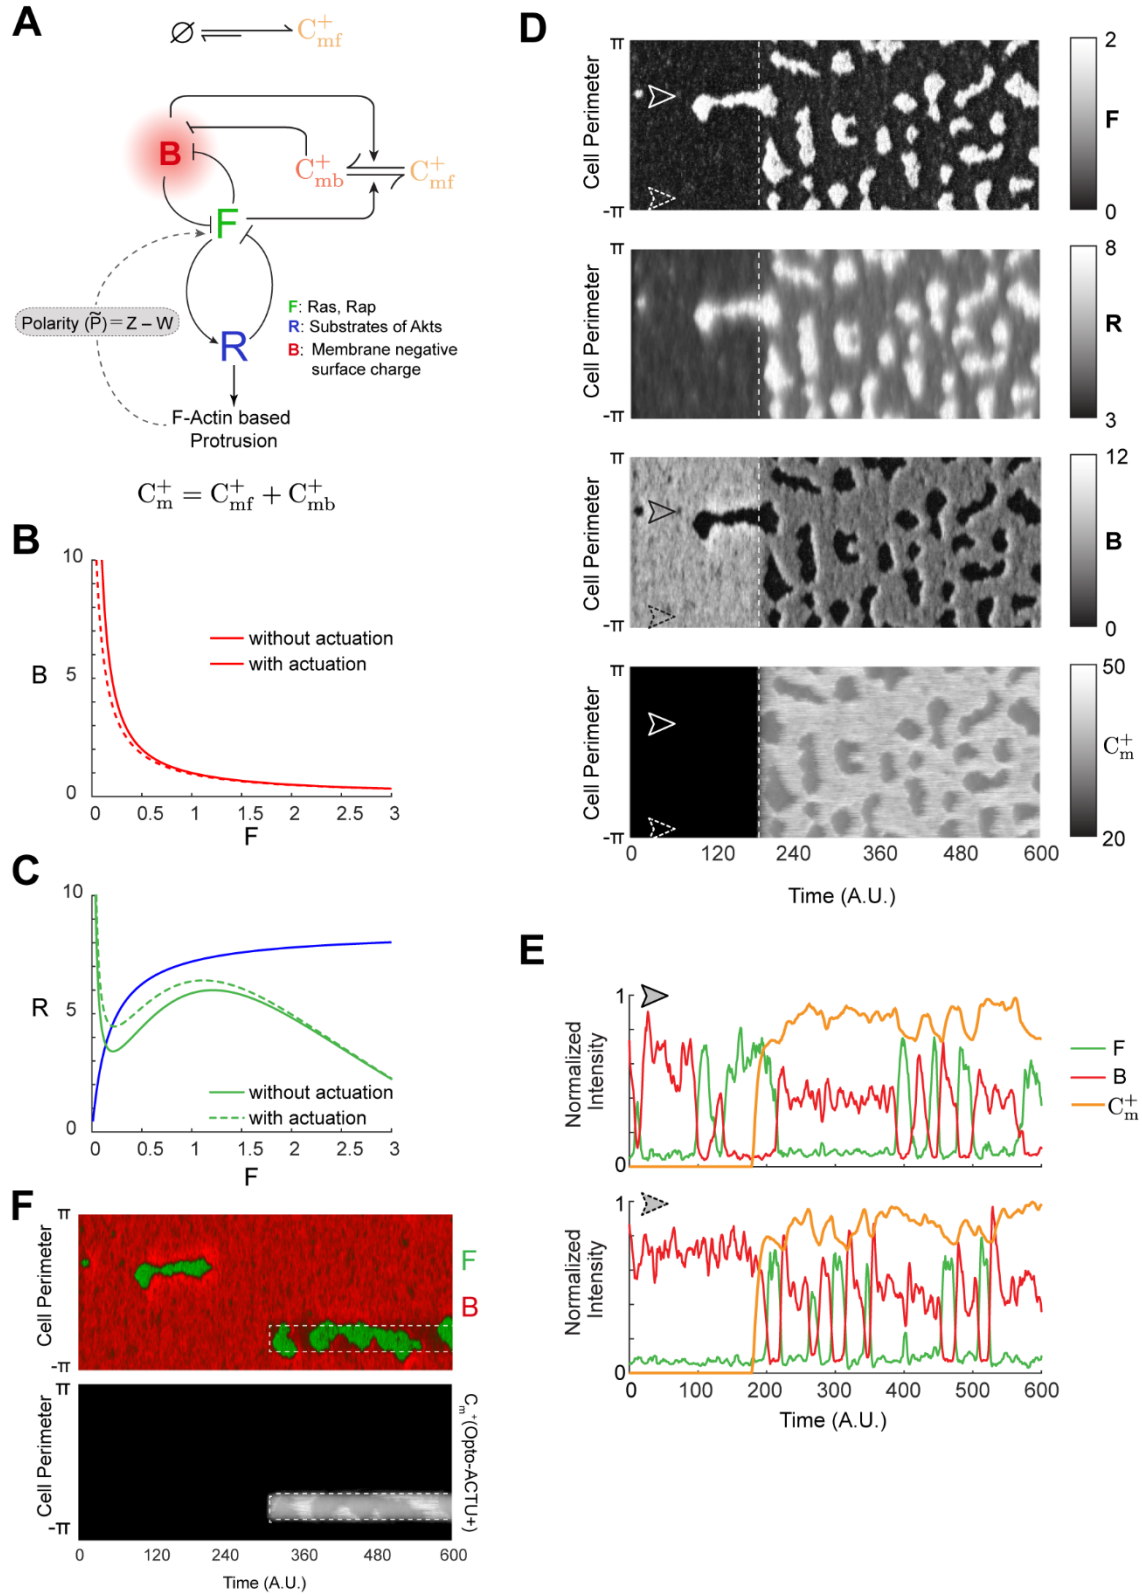

1 **Figure 6. *In silico* lowering of surface charge recreates the polarity breaking and**  
2 **demonstrates increased activity over the membrane. (A)** Schematic showing coupled system  
3 of excitable network, polarity module (involving Z and W), and Opto-ACTU+ ( $C_m^+$ ) system. The  
4 excitable network involves membrane states F (front), B (back, defined by overall surface charge  
5 of inner membrane), and R (refractory). The polarity module comprises of local activator Z and  
6 delayed globally diffusing inhibitor W. The Opto-ACTU+ system constitutes of fast diffusing  
7 state  $C_{mf}^+$  and almost stationary membrane bound state  $C_{mb}^+$ . The total charge actuator,  $C_m^+$  on the  
8 membrane is the summation of both the states. **(B)** Plot of B vs F with and without Opto-  
9 ACTU+. **(C)** F and R nullclines with and without Opto-ACTU+ (under the steady-state  
10 assumption for B). **(D)** The simulated kymographs of F (first), R (second), B (third) and  $C_m^+$   
11 (fourth) in response to global recruitment. The instant of recruitment is shown by the white  
12 dashed line. **(E)** Line scans at two locations (denoted by arrows) on the simulated kymographs  
13 showing the temporal profiles of F (green), B (red) and  $C_m^+$  (orange). **(F)** Simulated kymographs  
14 of membrane states in response to the selective recruitment of Opto-ACTU+ ( $C_m^+$ ). Merged view  
15 of F (green) and B (red) are shown in the top panel; profile of Opto-ACTU+ ( $C_m^+$ ) was shown in  
16 the bottom panel (in grayscale); the location of *in silico* selective recruitment is denoted by the  
17 white dashed box. **(G)** Schematic showing the cationic concentration ( $C_m^+/Ca^{2+}$ ) elevation  
18 system coupled with the excitable network and the polarity module. **(H)** The simulated  
19 kymographs in response to global increase in *in silico* calcium concentration. Merged view of F  
20 (green) and B (red) are shown in the top panel and the profile of  $C_m^+/Ca^{2+}$  was shown in the  
21 bottom panel.

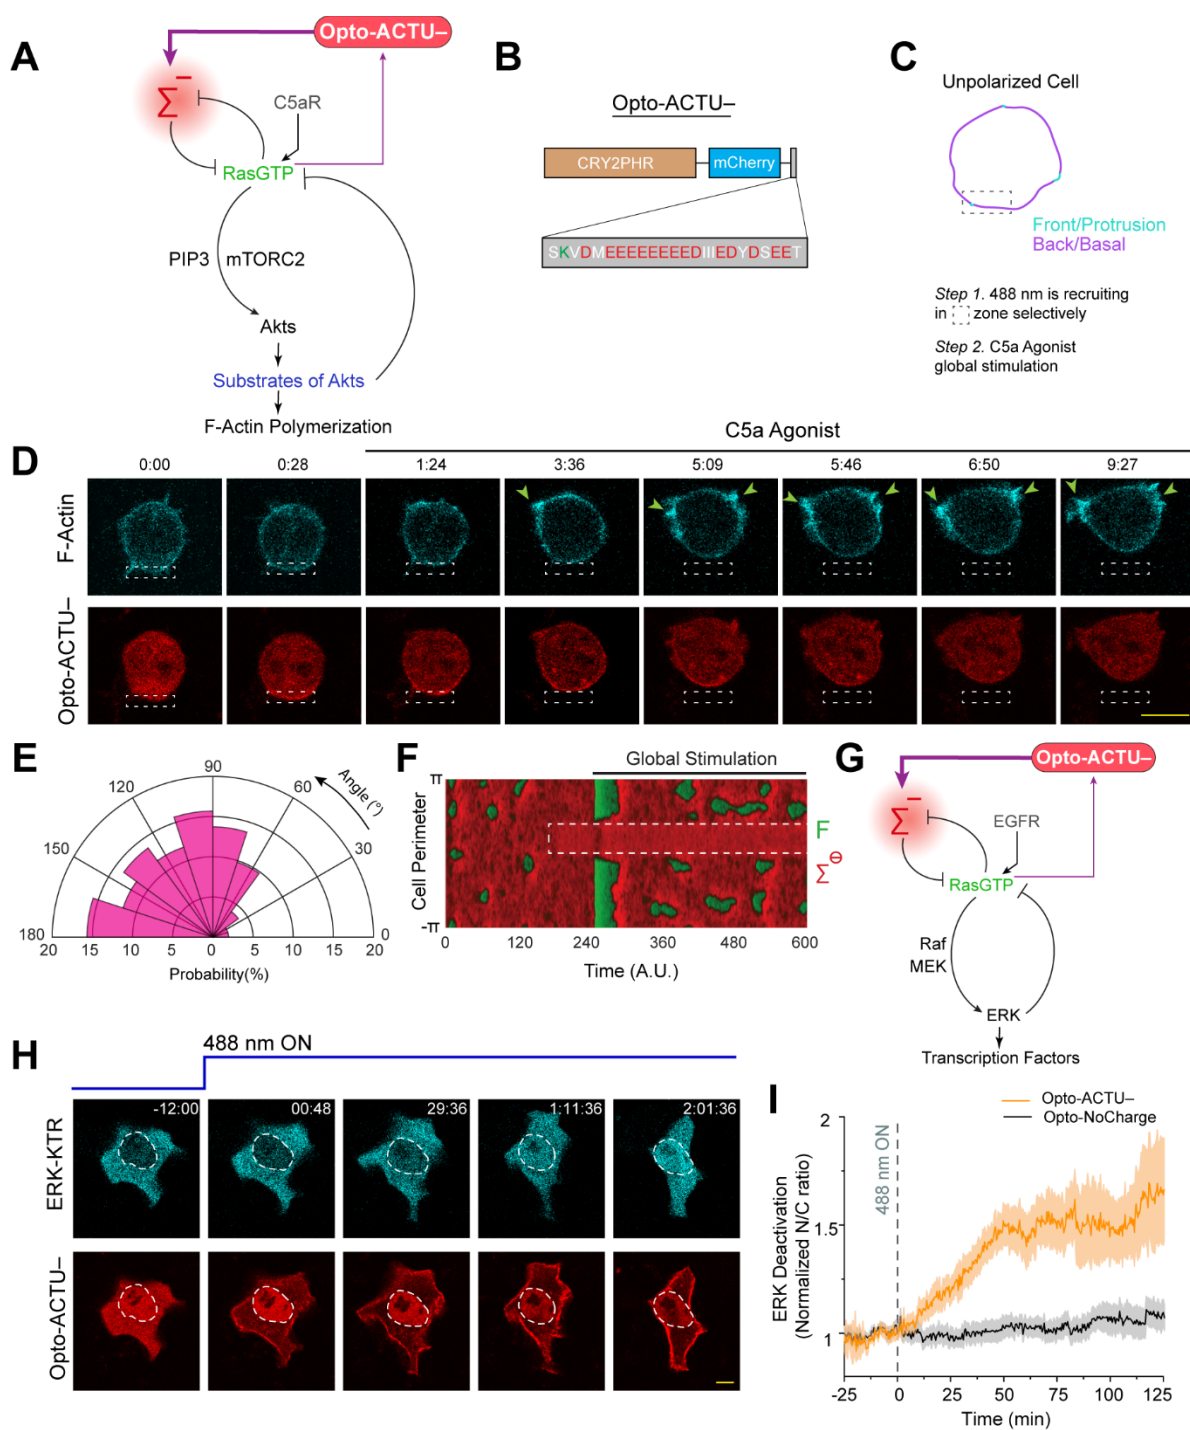

1 **Figure 7. Increase in negative surface potential in the membrane suppresses protrusions**  
2 **and, separately, deactivates the EGF induced ERK activity. (A)** Scheme for elevation of  
3 negative surface charge on membrane by the recruitment of negatively-charged optogenetic  
4 actuator, Opto-ACTU<sup>-</sup>, in context of biochemical excitable network topology with receptor  
5 input. **(B)** Design of Opto-ACTU<sup>-</sup> with net charge -14. Positively-charged amino acids in green,  
6 negatively-charged amino acids in red. **(C-E)** Experimental setup of selective Opto-ACTU<sup>-</sup>  
7 recruitment, followed by uniform C5a stimulation, in unpolarized RAW 264.7 macrophages (C);  
8 representative time-lapse images demonstrating cell migration driven by selective protrusion  
9 suppression in the site where Opto-ACTU<sup>-</sup> was locally recruited and protrusion formation in  
10 other areas of cortex upon uniform C5a stimulation (D); polar histogram indicating higher  
11 probability of protrusion formation away from recruitment area. Time in min:sec format (D);  
12 Green arrows: F-actin-rich protrusions marked by Lifeact (d);  $n_c=12$  cells,  $n_p=55$  protrusions (E).  
13 Cells were co-expressing Opto-ACTU<sup>-</sup>, CIBN-CAAX, and Lifeact-mVenus. **(F)** Simulated  
14 kymograph of membrane states in response to the *in silico* recruitment of Opto-ACTU<sup>-</sup> ( $C_m^-$ ),  
15 followed by global stimulation. Front or F-state is in green, back or  $\Sigma^-$ -state is in red. **(G)**  
16 Scheme for elevation of negative surface charge in context of excitable network-mediated ERK  
17 regulation, along with receptor input module. **(H)** Representative time-lapse images of epithelial  
18 MCF10A cell displaying ERKKTR translocation from cytosol to nucleus demonstrating ERK  
19 deactivation, upon Opto-ACTU<sup>-</sup> global recruitment to membrane; cells were pre-treated with  
20 and maintained in a saturating dose of EGF throughout the experiment; time in hr:min:sec format  
21 (H). **(I)** Quantification of ERK deactivation in terms of ERKKTR nucleus/cytosol ratio;  $n=12$   
22 cells for each case (Opto-ACTU<sup>-</sup> and Opto-CTRL), mean  $\pm$  SEM; 488 nm was turned on first at  
23  $t=0$  min.



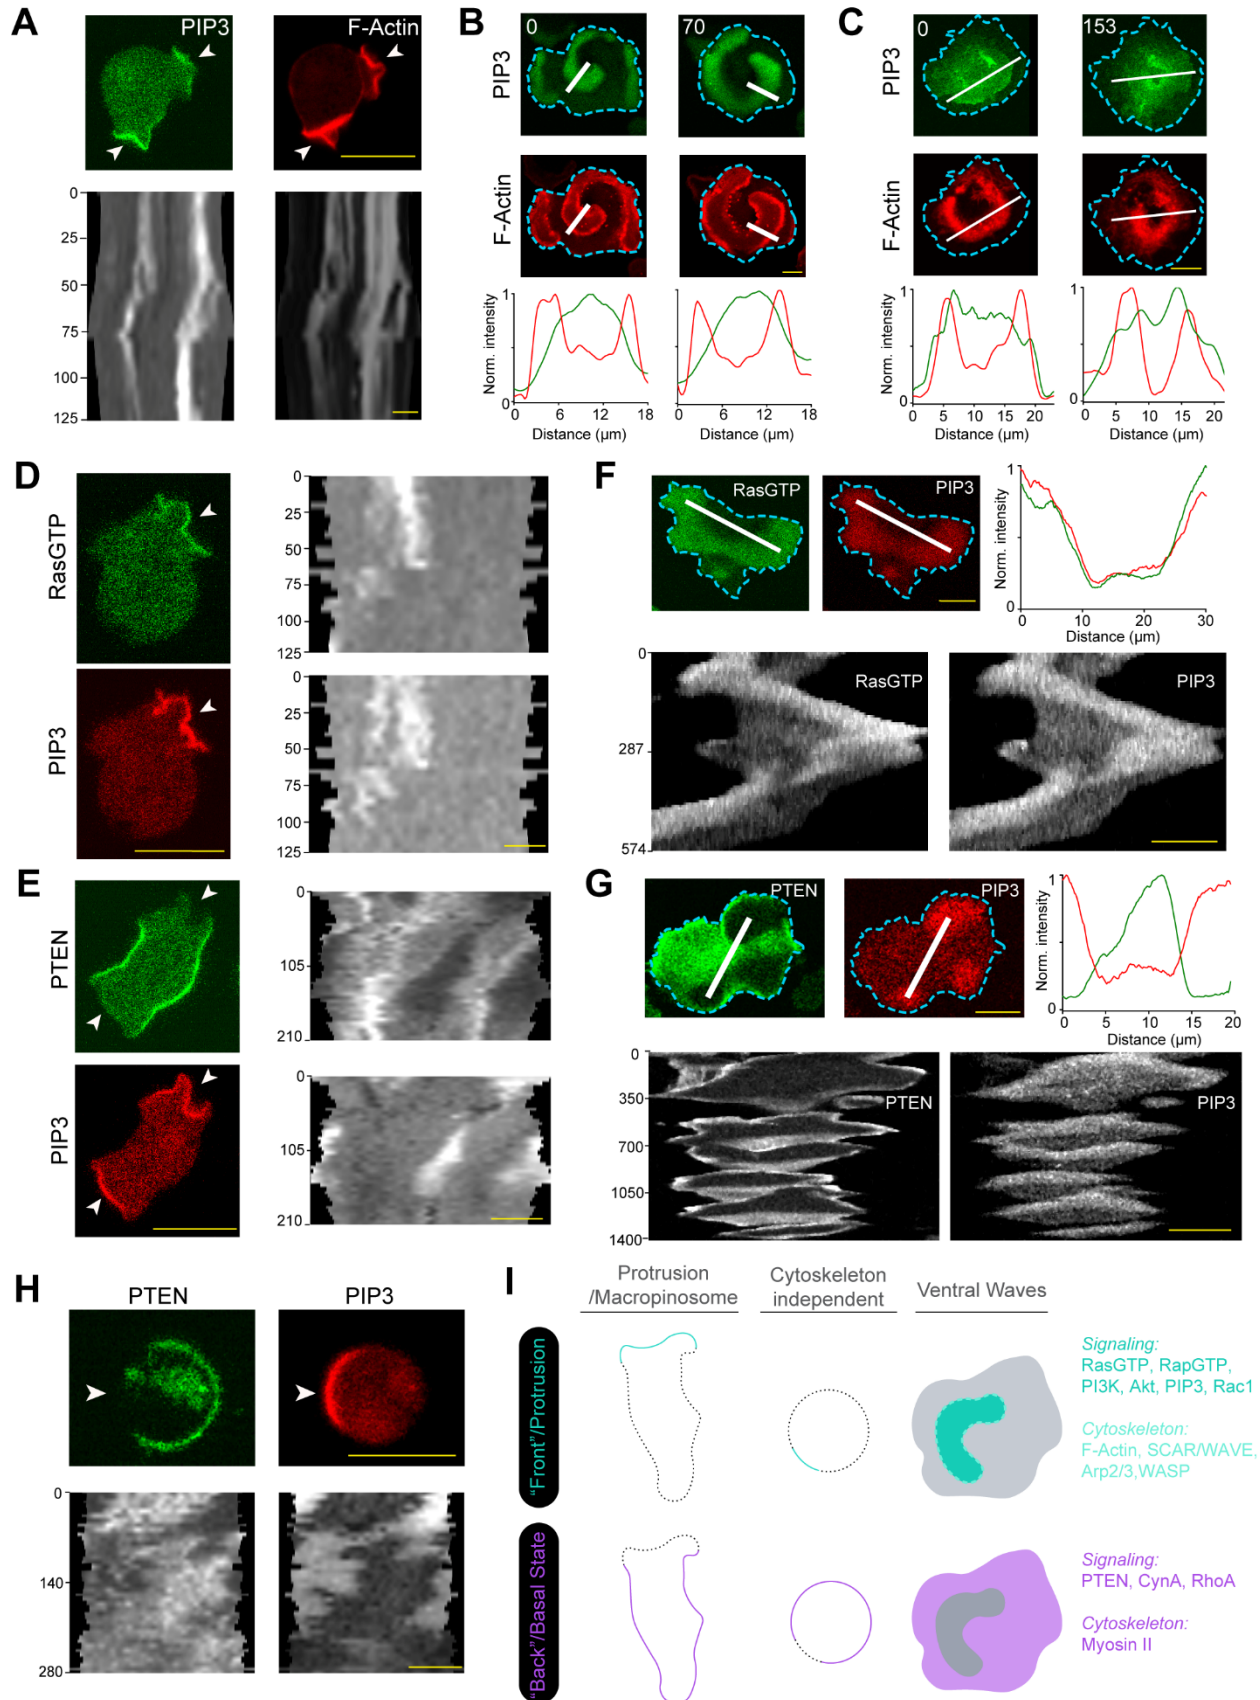

1 **Figure S1. Cells generate two mutually exclusive dynamic states in the membrane during**  
2 **migration and ventral wave propagation. (A)** Coordinated localization dynamics of signaling  
3 (PIP(3,4,5)P3 or PIP3) and cytoskeletal components (F-actin) in migrating *Dictyostelium* cell  
4 protrusions. PIP3 is marked by PH<sub>crac</sub>-GFP, newly polymerizing F-actin is marked by LimE<sub>Δcoil</sub>-  
5 mCherry. Top panel: Representative live-cell images (White arrows: Protrusions rich in both F-  
6 actin and PIP3). Bottom panel: 360° membrane kymographs show consistency of coordination.  
7 Here and in all other grayscale kymographs, numbers on the left denote time in seconds, unless  
8 otherwise mentioned. **(B and C)** Coordinated propagation of signaling and cytoskeletal  
9 components in ventral cortical waves of *Dictyostelium* (B) and RAW 264.7 macrophages (C).  
10 Signaling component PIP3 is marked by PH<sub>crac</sub>-GFP in *Dictyostelium* and by PH<sub>AKT</sub>-GFP in  
11 macrophages. Newly polymerizing F-actin is marked by LimE<sub>Δcoil</sub>-mCherry in *Dictyostelium* and  
12 by Lifeact- mCherry in macrophages. Top two panels show live-cell time-lapse images and  
13 bottom panels show line-scan intensity profile along the white lines. **(D and E)** Activated Ras  
14 (marked by Ras-Binding Domain of mammalian Raf1; RBD) and PIP3 co-localizes in the  
15 protrusions (D), whereas PTEN dissociates from the protrusions and displays a tight  
16 complementary kinetics with respect to PIP3 (E), in migrating *Dictyostelium* cells.  
17 Representative live-cell images (left) and 360° membrane kymographs (right) are shown; White  
18 arrows: Protrusions/front-states, marked by RBD and/or PIP3. **(F and G)** In propagating ventral  
19 waves of *Dictyostelium* cells, activated Ras and PIP3 dynamically colocalizes and defines the  
20 front-state regions (F), whereas PIP3 and PTEN exhibit consistent complementarity (G).  
21 Representative live-cell image, line-scan intensity profile, and line-kymographs are shown. **(H)**  
22 Complementary spatiotemporal distribution of signaling front (PIP3) and back markers (PTEN)  
23 is independent of cytoskeleton. Here *Dictyostelium* cells exhibit symmetry breaking in

1 membrane, in presence of 5  $\mu$ M Latrunculin A (inhibitor of F-actin polymerization).  
2 Representative live-cell images and 360° membrane kymograph are shown. White arrows  
3 denoting front-states. **(I)** Overall schematic shows the front-back complementary patterning in  
4 three different scenarios: migrating cell protrusions, cytoskeleton independent cortical symmetry  
5 breaking, and propagating ventral waves. When imaging first two cases, we studied a 1D profile,  
6 whereas for the case of ventral waves, we observed a 2D profile at the substrate-attached surface.  
7 A number of examples of established signaling and cytoskeletal components are listed and  
8 categorized based on their front or back-state localization. Note that, in all situations, when a  
9 front is created from the back or basal-state of the membrane, all back markers move away from  
10 that particular area, maintaining asymmetry and complementarity. For all figures, scale bars are  
11 10  $\mu$ m.



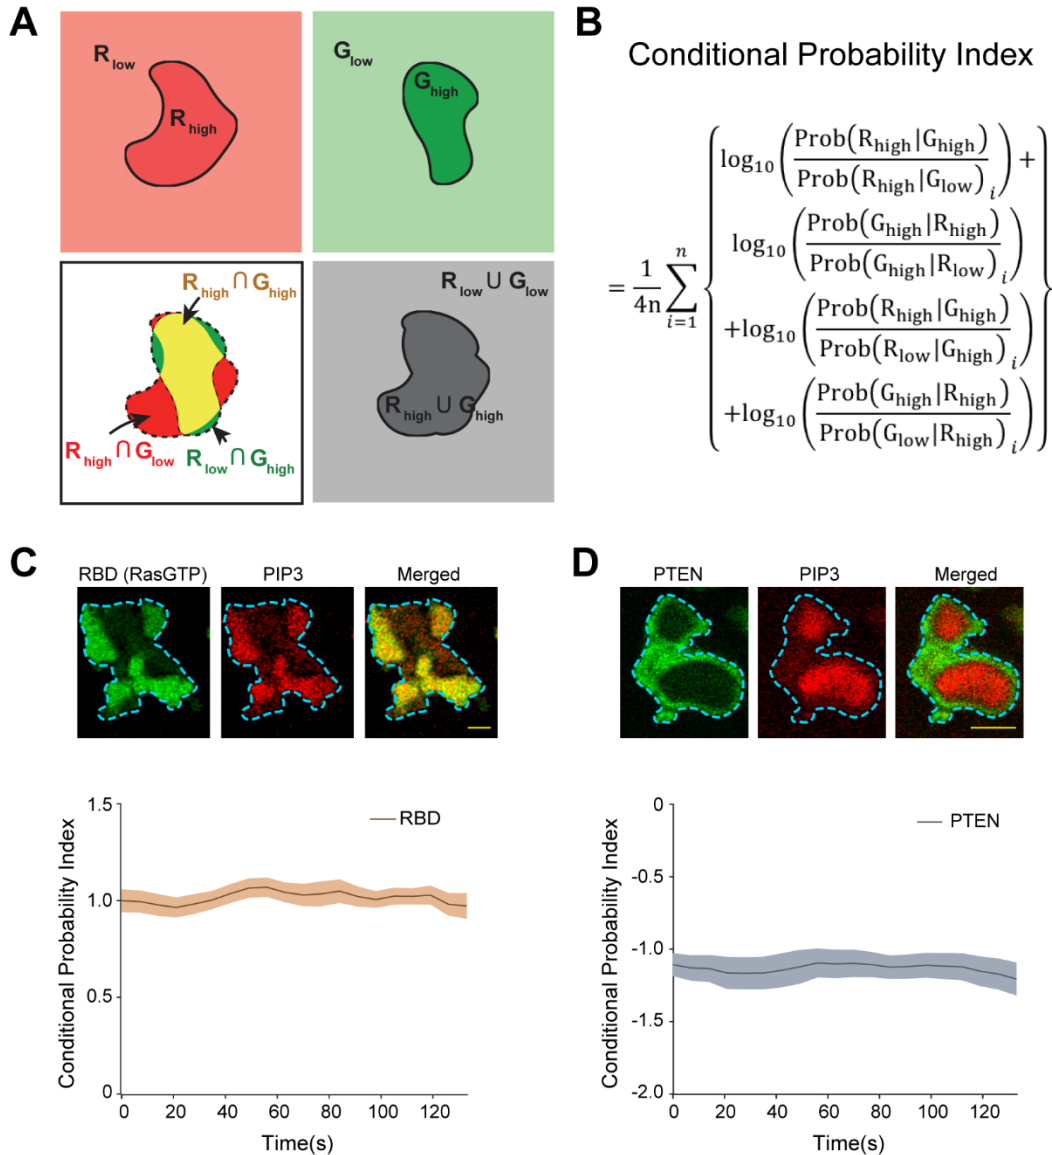

1 **Figure S2. Developing conditional probability index as a metric to quantify the extent of co-**  
 2 **localization and complementary localization.** (A) Schematics showing the application of the  
 3 concepts of conditional probability in quantifying the degree of colocalization between two  
 4 entities, R and G. The regions of the high enrichments of the species R and G are denoted as  
 5  $R_{\text{high}}$  and  $G_{\text{high}}$  against the depleted states of  $R_{\text{low}}$  and  $G_{\text{low}}$ , respectively (top panels). The  
 6 overlapped region (yellow in the bottom left panel) denotes  $R_{\text{high}} \cap G_{\text{high}}$ . The other necessary

1 probabilities are also shown which are required in the computation of the respective Conditional  
2 Probability Index (CP index). **(B)** The mathematical description of the CP index. As usual,  
3  $P(R_{\text{high}}|G_{\text{high}})$  denotes Probability of selecting  $R_{\text{high}}$ , given  $G_{\text{high}}$  is already selected (please see  
4 methods for details). **(C and D)** Time series plots of CP indices of established back protein  
5 PTEN (C) and established front sensor RBD (D); number of cells  $n_c=15$  for RBD (C) and  $n_c=17$   
6 for PTEN (D). To generate CP index time-plots, each cell was analyzed for  $n_f=20$  frames; data  
7 are mean  $\pm$  SEM. Top panels show representative images of ventral waves in cells co-expressing  
8 either  $\text{PH}_{\text{Crac}}$  and RBD (C) or  $\text{PH}_{\text{Crac}}$  and PTEN (D). Note that the CP index value of PTEN is  
9 negative and RBD is positive which demonstrate their back- and front-state localization,  
10 respectively. Throughout this paper, all CP indices are calculated with respect to PIP3.

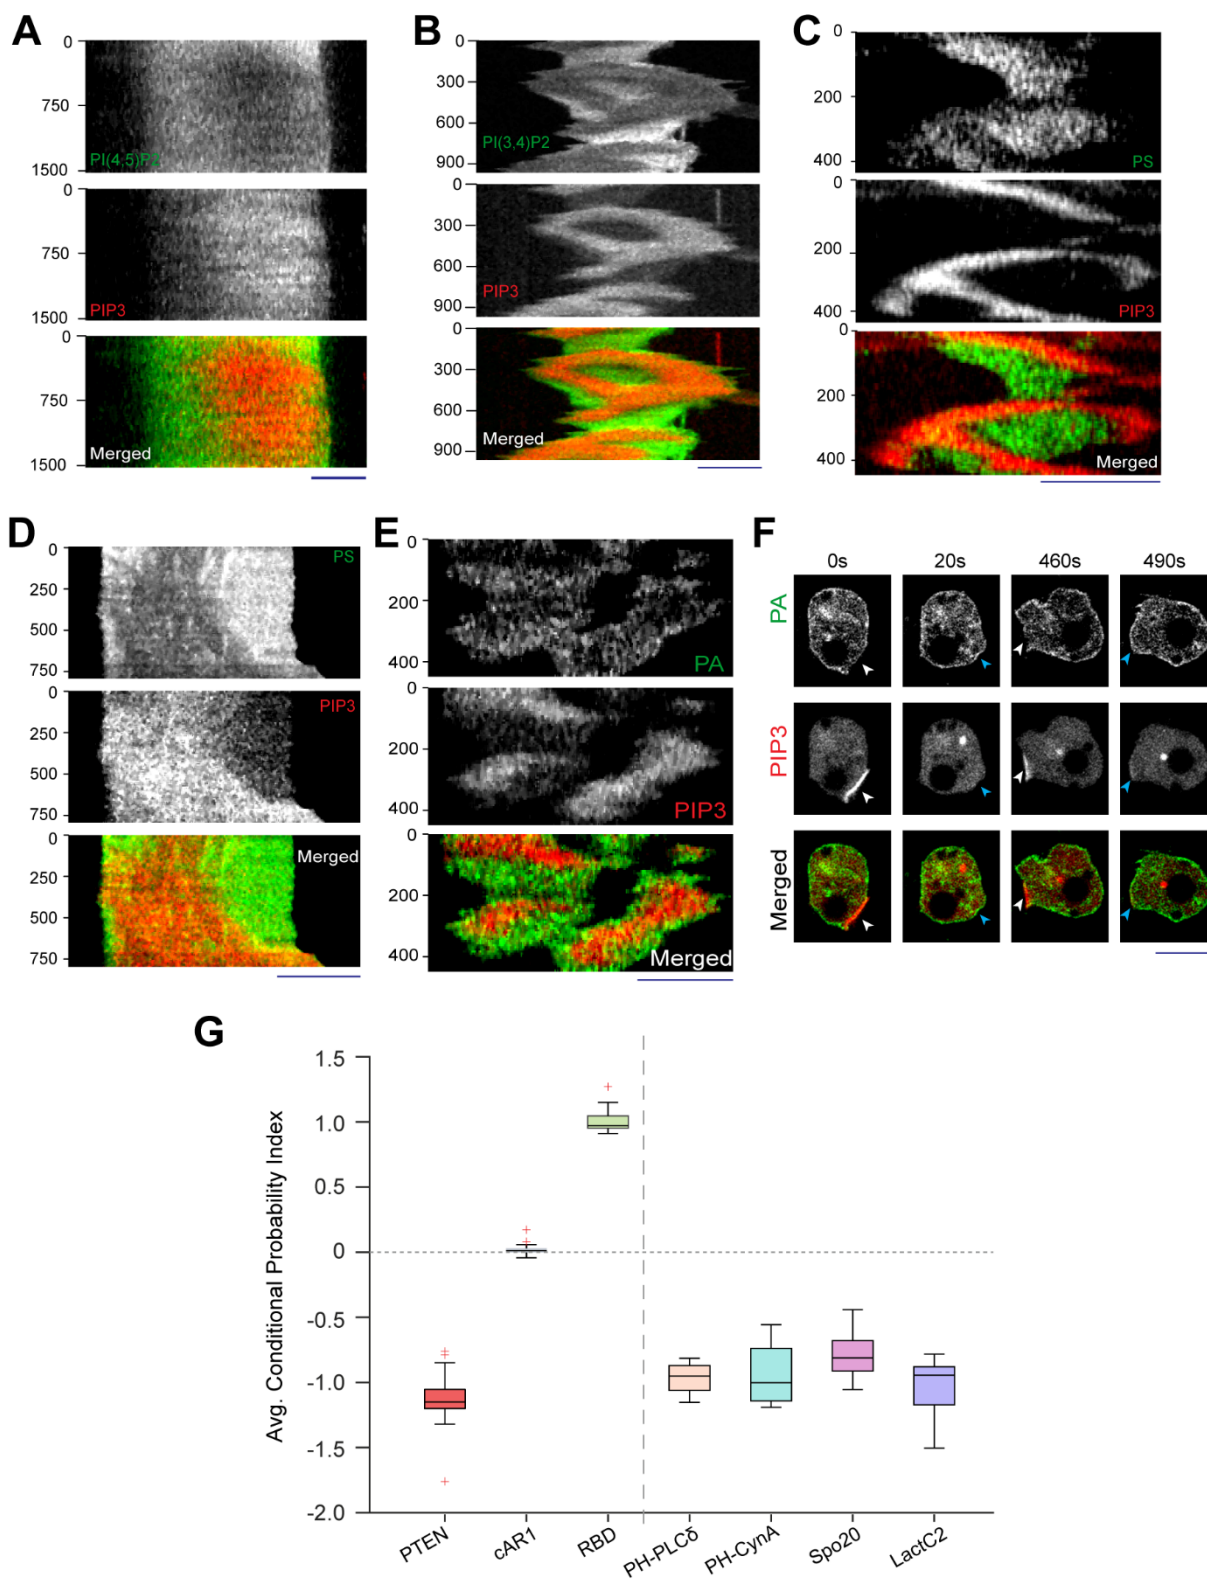

1 **Figure S3. PI(4,5)P2, PI(3,4)P2, PS, and PA exhibit consistent yet dynamic back-state**  
2 **distribution. (A)** Representative line-kymograph of ventral waves in RAW 264.7 macrophage  
3 cells co-expressing PI(4,5)P2 biosensor, GFP-PH<sub>PLC $\delta$</sub> , and PIP3 biosensor, PH<sub>Akt</sub>-mCherry.  
4 Time-lapse images and line-scan intensity profiles were shown in Fig. 1c. **(B)** Representative  
5 line-kymograph of ventral waves in *Dictyostelium* cells co-expressing PI(3,4)P2 biosensor,  
6 PH<sub>CynA</sub>-KikGR and PIP3 biosensor, PH<sub>Crac</sub>-mCherry. Time-lapse images and line-scan intensity  
7 profiles were shown in Fig. 1D. **(C)** Representative line-kymographs of ventral wave pattern  
8 shown in *Dictyostelium* cells co-expressing PS sensor GFP-LactC2 and PIP3 sensor, PH<sub>Crac</sub>-  
9 mCherry. Time-lapse images and line-scan intensity profiles were shown in Fig. 1G. **(D)**  
10 Representative line-kymographs of ventral wave pattern in RAW 264.7 macrophage cells co-  
11 expressing PS sensor GFP-LactC2 and PIP3 sensor, PH<sub>Akt</sub>-mCherry. Time-lapse images and  
12 line-scan intensity profiles were shown in Fig. 1h. **(E)** Representative line-kymographs of ventral  
13 wave pattern in *Dictyostelium* cells co-expressing PA sensor, GFP-Spo20 and PIP3 sensor,  
14 PH<sub>Crac</sub>-mCherry. Time-lapse images and line-scan intensity profiles were shown in Fig. 1J. **(F)**  
15 Time-lapse images of migrating *Dictyostelium* cells co-expressing GFP-Spo20 and PH<sub>Crac</sub>-  
16 mCherry. White arrows: Protrusions where PIP3 is enriched and PA is depleted. Blue arrows:  
17 Spo20 returned back to the membrane as protrusions were eventually retracted and membrane  
18 domain returned to its basal back-state. **(G)** Box and Whisker plot of time-averaged CP indices  
19 of four anionic phospholipids (PI(4,5)P2, PI(3,4)P2, PS, and PA), together with uniform  
20 membrane marker control cAR1, back protein PTEN, and front sensor RBD;  $n_c=16$  cells for  
21 PI(4,5)P2/PH<sub>PLC $\delta$</sub> ,  $n_c=11$  cells for PI(3,4)P2/PH<sub>CynA</sub>,  $n_c=15$  cells for PS/LactC2,  $n_c=16$  cells for  
22 PS/Spo20,  $n_c=20$  cells for cAR1,  $n_c=17$  cells for PTEN,  $n_c=15$  cells for RBD. To generate  
23 each datapoint,  $n_f=20$  frames were averaged for the above-mentioned number of cells.

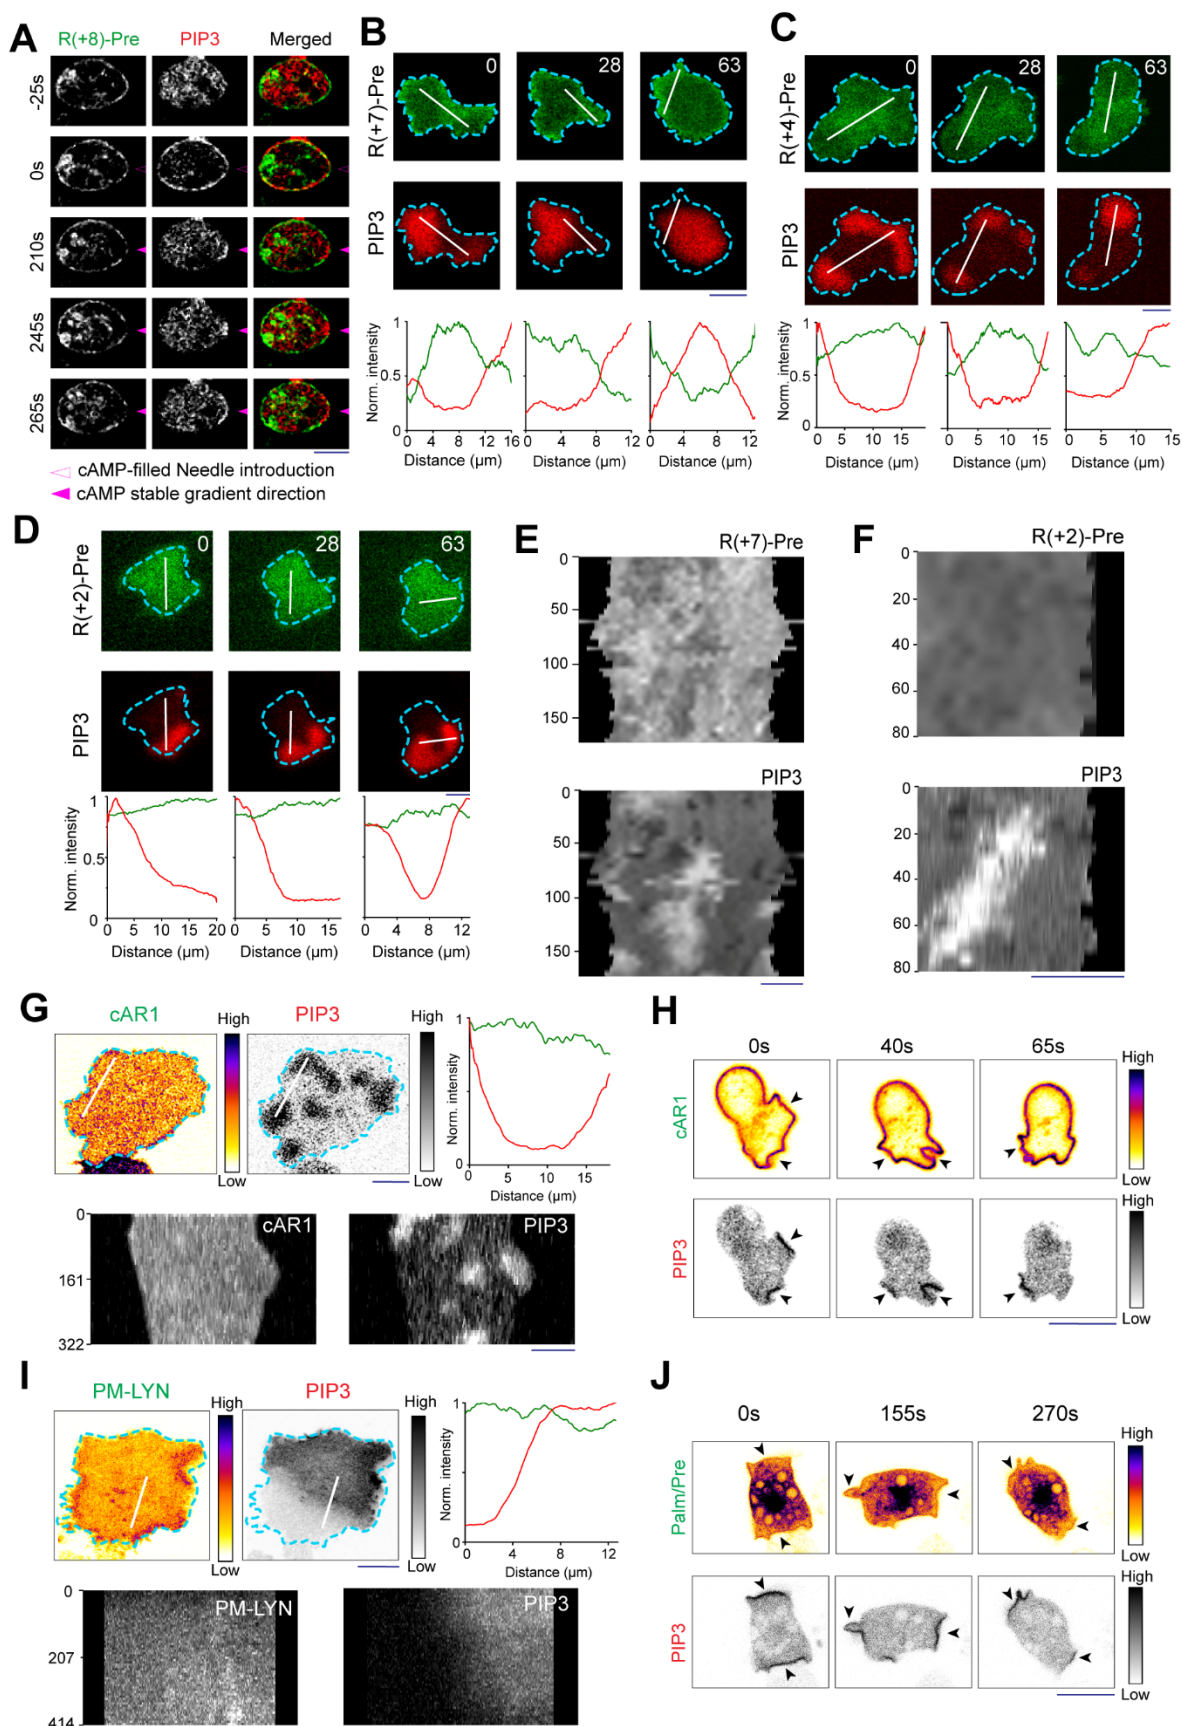

1 **Figure S4. Spatiotemporal organization of different mutated charge sensors and uniform**  
2 **membrane controls. (A)** Representative live cell images of *Dictyostelium* cells co-expressing  
3 GFP-R(+8)-Pre and PH<sub>Crac</sub>-mCherry under chemotactic gradient stimulation. Solid magenta  
4 arrowhead indicates the direction of micropipette (filled with 1  $\mu$ M cAMP) for gradient  
5 stimulation. Dashed magenta arrowhead indicates the introduction of needle ( $t=0$ s) which is  
6 manifested by the transient global response in PH<sub>Crac</sub> channel. Cells were pre-treated with  
7 Latrunculin A. **(B-D)** Live-cell time-lapse images and linescan intensity profiles of *Dictyostelium*  
8 cells expressing PIP3 biosensor, PH<sub>Crac</sub>-mCherry, along with GFP-R(+7)-Pre (B) or GFP-R(+4)-  
9 Pre (C) or GFP-R(+2)-Pre (D), in ventral waves of *Dictyostelium* cells, displaying decreasing  
10 extent of back-state preference. The first time points were showed in Fig. 2J (in grayscale  
11 colormap). **(E and F)** The 360° membrane kymographs of cells shown in Fig. 2k indicates  
12 R(+7)-Pre consistently moves away from PIP3-rich protrusions (E), whereas R(+2)-Pre is  
13 uniform over the cortex (F). **(G)** Representative live-cell images, linescan intensity profiles, and  
14 representative line-kymographs of ventral waves in *Dictyostelium* cells co-expressing PH<sub>Crac</sub>-  
15 mCherry and membrane marker cAR1-GFP, demonstrating that cAR1 does not distribute to  
16 front- or back- state regions and it is consistently uniform over the membrane. The “Fire invert”  
17 LUT was used for cAR1 so that it can clearly show any small inhomogeneity. **(H)**  
18 Representative live-cell time-lapse images of migrating *Dictyostelium* cells co-expressing PH<sub>Crac</sub>-  
19 mCherry and cAR1-GFP shows that cAR1 is symmetric over the membrane. Black arrows:  
20 cAR1 does not move away from the PIP3- rich protrusions. **(I)** Representative live-cell images,  
21 linescan intensity profiles, and representative line-kymographs of ventral waves in RAW 264.7  
22 cells co-expressing PH<sub>AKT</sub>-mCherry and membrane marker, LYN-GFP, showing consistent  
23 uniform profile of LYN over the membrane and no depletion in front-state area. **(J)**

- 1 Representative live-cell time-lapse images of migrating *Dictyostelium* cells co-expressing PH<sub>crac</sub>-
- 2 mCherry and GFP-Palm/Pre, showing a symmetric profile of Palm/Pre over the membrane.
- 3 Black arrows: Protrusions/front-states.

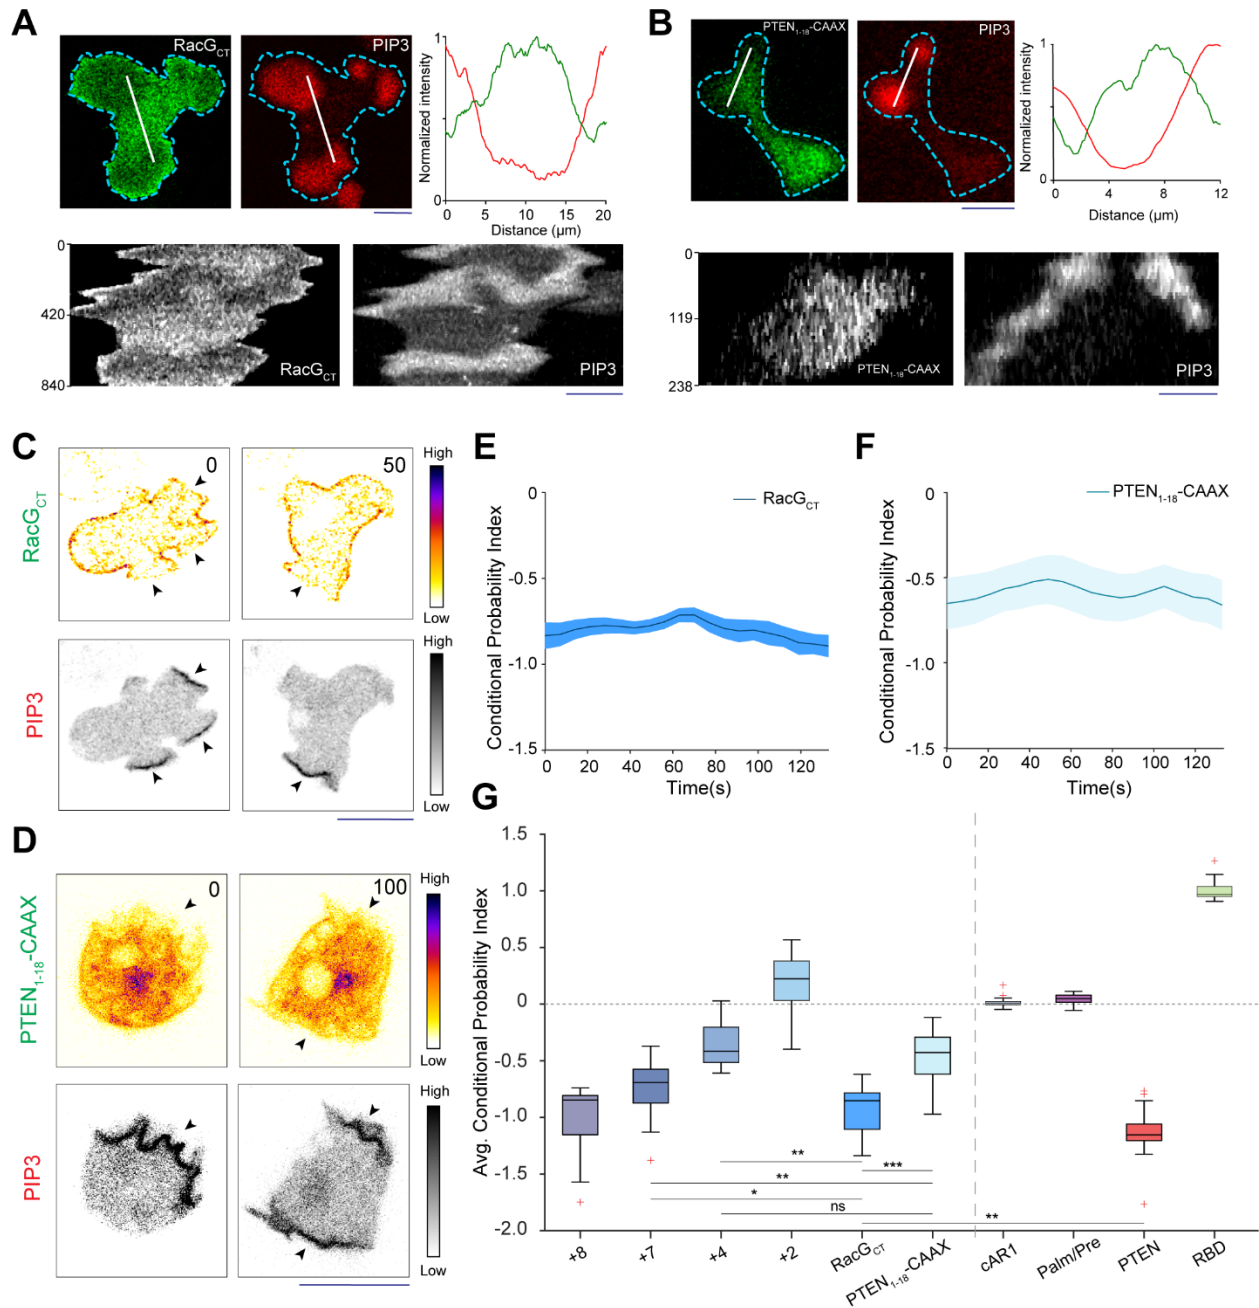

1 **Figure S5. Different polybasic sequences localize to back-state regions depending on their**  
 2 **charge, irrespective of their exact amino acid sequences. (A and B) Representative live-cell**  
 3 **images, linescan intensity profiles, and representative line-kymographs of *Dictyostelium* cells co-**



1 expressing PH<sub>Rac</sub>-mCherry and GFP-RacG<sub>CT</sub> (A) or PTEN<sub>1-18</sub>-CAAX (B), demonstrating  
2 consistent dynamic back distribution for RacG<sub>CT</sub> and limited back distribution for PTEN<sub>1-18</sub>-  
3 CAAX in ventral waves. **(C and D)** Representative live-cell time-lapse images showing  
4 distribution of RacG<sub>CT</sub> (C) or PTEN<sub>1-18</sub>-CAAX (D) in migrating *Dictyostelium* cells,  
5 demonstrating a localization profile analogous to (A and B). **(E and F)** Time series plot of CP  
6 index of RacG<sub>CT</sub> (E) and PTEN<sub>1-18</sub>-CAAX (F) show the extent of back localization; n<sub>c</sub>=17 for  
7 RacG<sub>CT</sub> (E), n<sub>c</sub>= 12 for PTEN<sub>1-18</sub>-CAAX (F); mean ± SEM. **(G)** Comparison of localization  
8 profile by Box and Whisker plot of time-averaged CP indices of all surface charge sensors,  
9 together with uniform membrane marker controls, back protein PTEN, and front sensor RBD;  
10 R(+8)-Pre: n<sub>c</sub> =30, R(+7)-Pre: n<sub>c</sub> =23, R(+4)-Pre: n<sub>c</sub> =20, R(+2)-Pre: n<sub>c</sub> =12, RacG<sub>CT</sub>: n<sub>c</sub> =17,  
11 PTEN<sub>1-18</sub>-CAAX :n<sub>c</sub> =12, cAR1: n<sub>c</sub> =20, Palm/Pre: n<sub>c</sub> =11, PTEN: n<sub>c</sub> =17, RBD: n<sub>c</sub> =15. To  
12 generate each datapoint, n<sub>f</sub> =20 frames were averaged for mentioned number of cells (n<sub>c</sub>). Box  
13 and whiskers are graphed as per Tukey's method. All p-values by Mann-Whitney-Wilcoxon test.

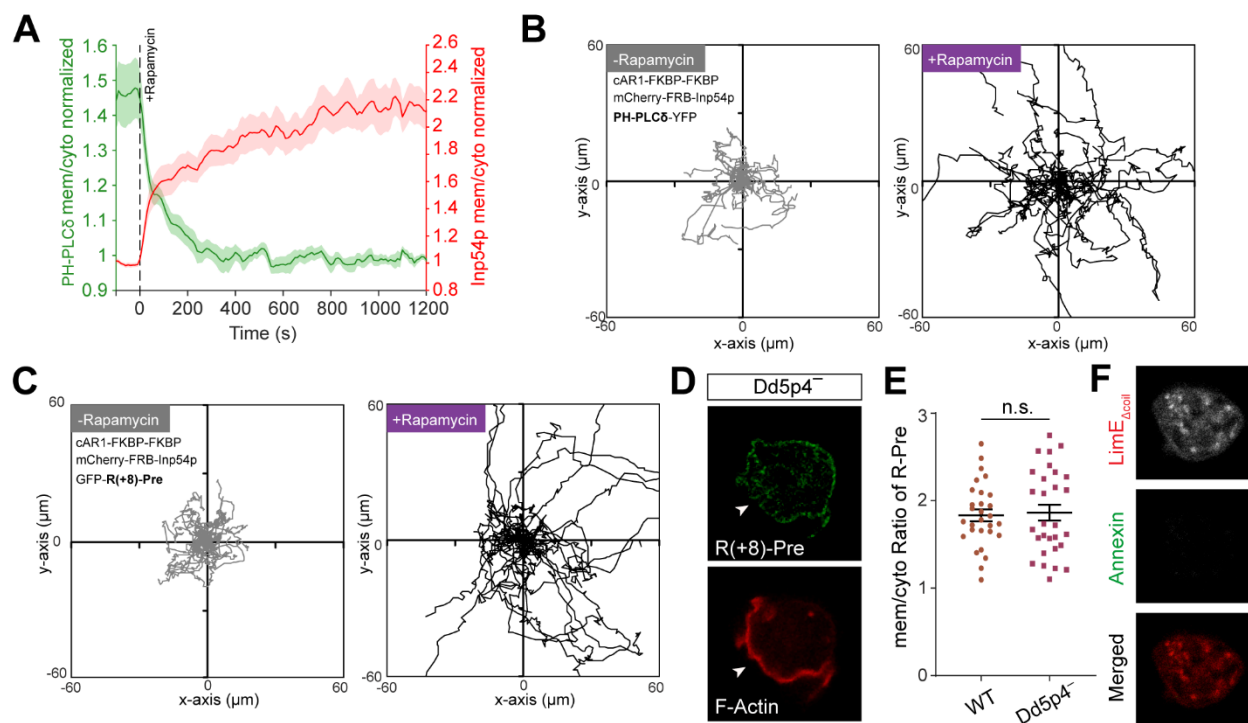

1 **Figure S6. Dynamics of surface charge sensor in PI(4,5)P2 and PI(3,4)P2 depleted cells. (A)**  
 2 Time course of membrane/cytosol ratio of PH<sub>PLC $\delta$</sub>  and Inp54p upon rapamycin addition  
 3 (indicated by black dashed vertical line), in *Dictyostelium* cells co-expressing cAR1-FKBP-  
 4 FKBP, mCherry-FRB-Inp54p, and PH<sub>PLC $\delta$</sub> -GFP, demonstrating PH<sub>PLC $\delta$</sub>  dissociated from  
 5 membrane upon PI(4,5)P2 depletion; n=17 cells; mean  $\pm$  SEM. **(B and C)** Cell tracks show the  
 6 migration profile of *Dictyostelium* cells expressing Chemically induced dimerization system  
 7 cAR1-FKBP-FKBP and mCherry-FRB-Inp54p, along with GFP-R(+8)-Pre (B) or PH<sub>PLC $\delta$</sub> -GFP  
 8 (C), before and after rapamycin induced recruitment. Tracks demonstrating similar change in  
 9 migration profile in both cases, as quantified in terms of migration speed in Figure 3D. To  
 10 generate each track for n<sub>c</sub>=32 cells (in each case), cells were followed for n<sub>f</sub>=60 frames  
 11 (7s/frame). **(D)** Representative image of Dd5p4<sup>-</sup> *Dictyostelium* cell (where PI(3,4)P2 level is

- 1 low) co-expressing GFP-R(+8)-Pre and LimE $\Delta$ coil-mRFP displaying characteristic membrane
- 2 association and back localization of R(+8)-Pre; white arrows denote F-actin rich protrusions. **(E)**
- 3 Quantification of membrane association of R(+8)-Pre in wild type and Dd5p4- cells, in terms of
- 4 membrane/cytosol ratio; n=29 cells in each case; p-value by Mann-Whitney-Wilcoxon test. **(F)**
- 5 Example of a quiet or non-protrusion forming *Dictyostelium* cells expressing LimE $\Delta$ coil-GFP,
- 6 whose outer leaflet of membrane was allowed to transiently bind with Annexin V.

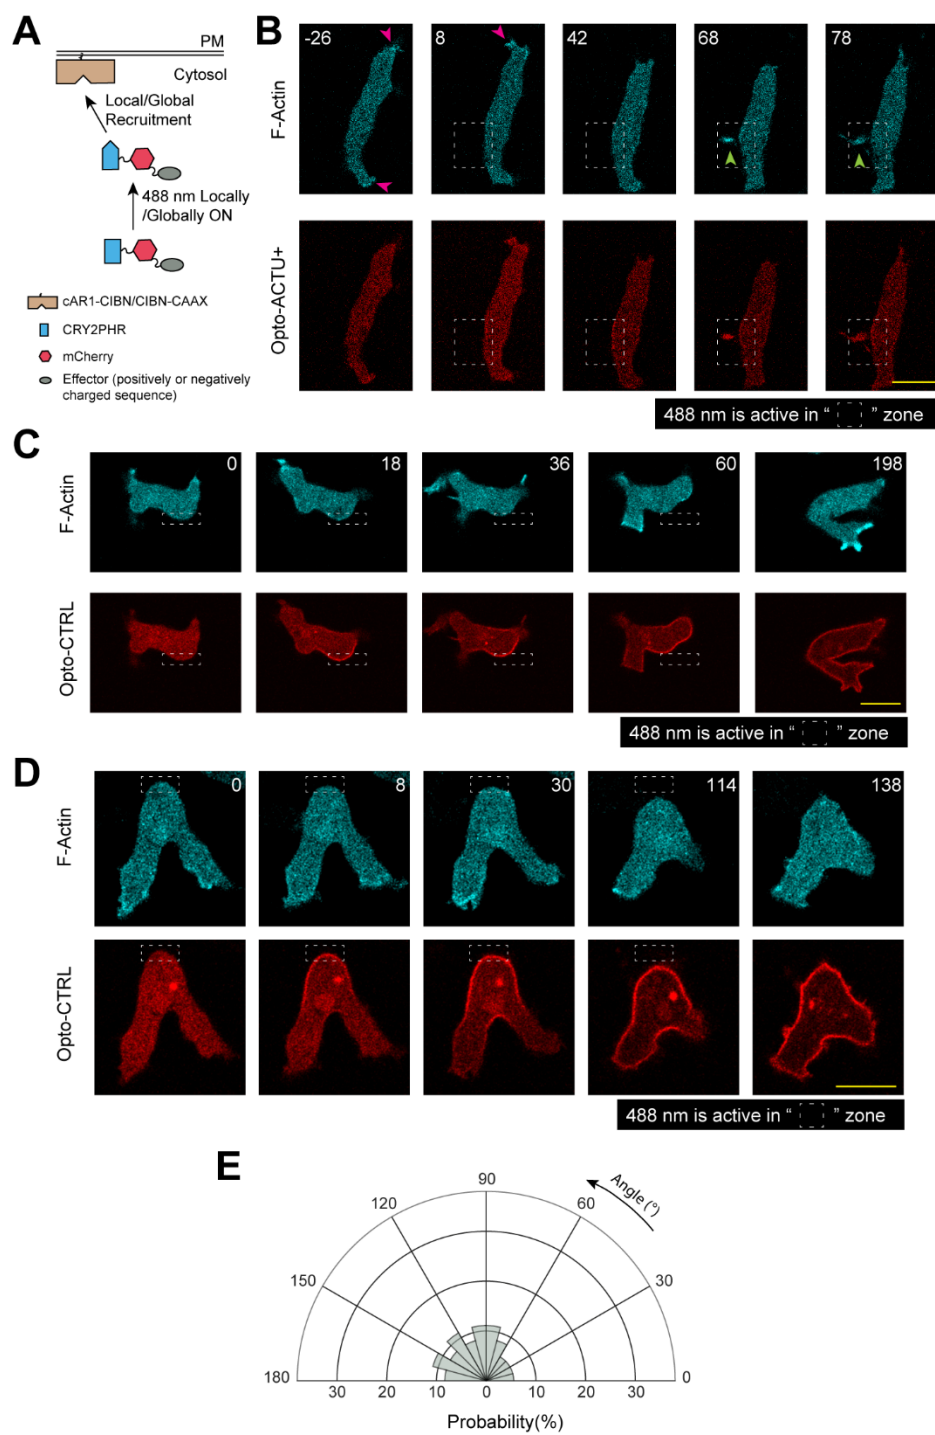

1 **Figure S7. Local recruitment of Opto-ACTU+ in polarized cells generates protrusion *de***  
2 ***novo* near recruitment area, whereas uncharged control Opto-CTRL recruitment cannot**  
3 **elicit any change. (A)** Scheme for optogenetic recruitment. Turning on 488 nm laser changes  
4 the conformation of CRY2PHR module and as a result it gets recruited to the plasma membrane-  
5 bound CIBN. The cAR1-CIBN is used in all *Dictyostelium* systems and CIBN-CAAX is used in  
6 all mammalian systems as membrane anchor. **(B)** A representative example of *de novo* formation  
7 of protrusion from a position of choice in the back-state region of the membrane by spatially  
8 confined recruitment of Opto-ACTU+. Magenta arrows: old protrusions, Green arrows: new  
9 protrusions. The experimental setup and another example are shown in Fig. 4c and 4d. **(C and**  
10 **D)** Two representative examples of spatially confined optogenetic recruitment of Opto-CTRL  
11 demonstrating no increase in protrusion generation from the site of recruitment. In (B-D), the  
12 numbers on the images denote time in seconds. **(E)** Polar histogram show probability of  
13 protrusion formation at the different parts of the cortex with respect to Opto-CTRL recruitment  
14 area;  $n_c=20$  cells,  $n_p=34$  protrusions.

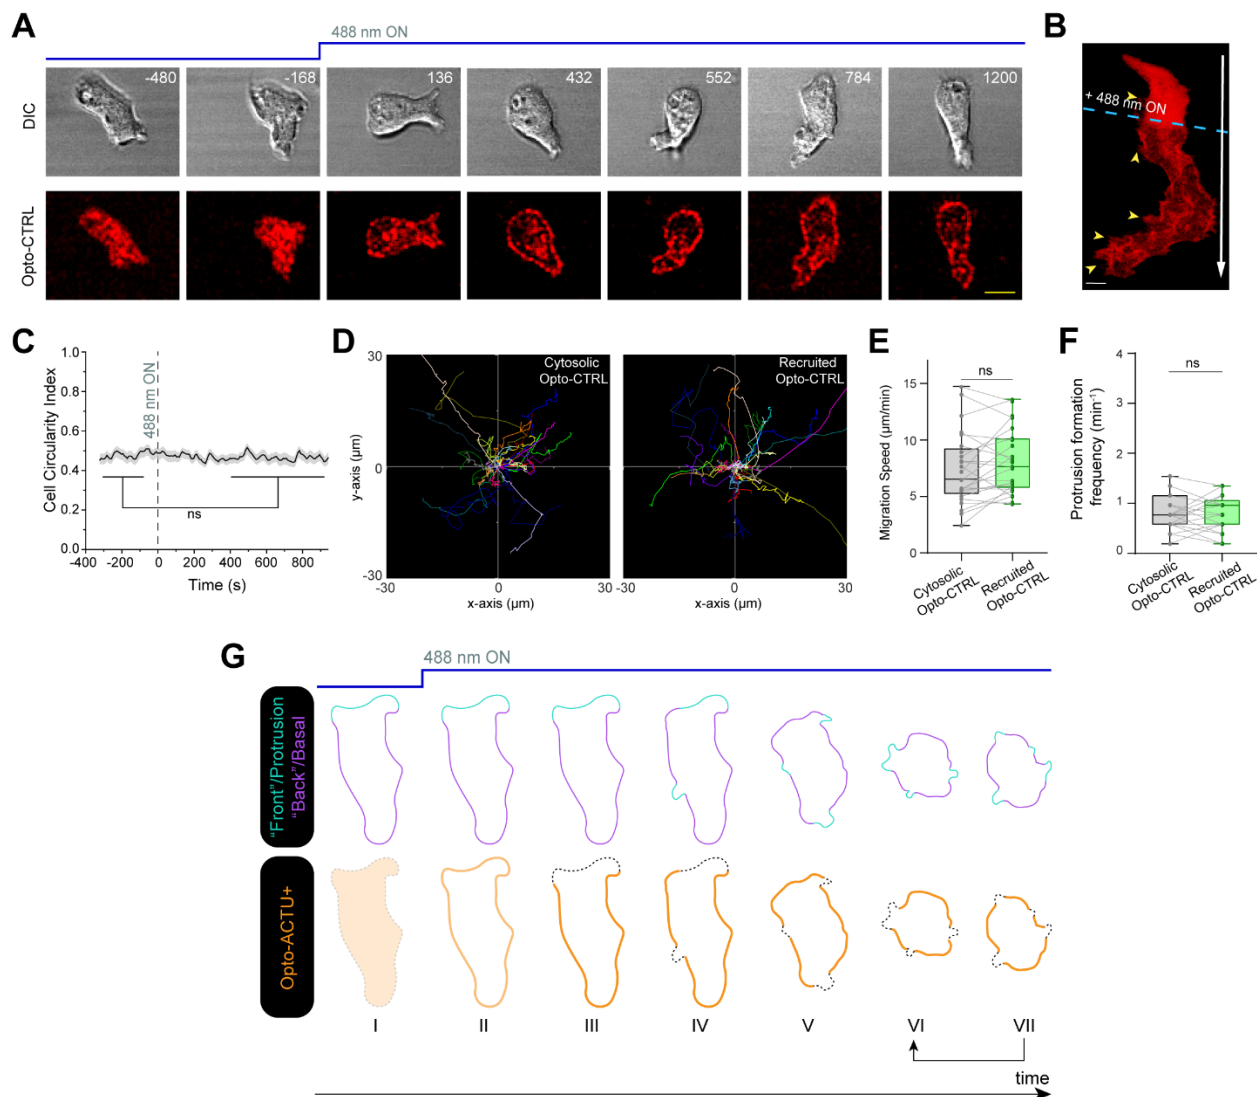

- 1 **Figure S8. Unlike Opto-ACTU+, recruited uncharged Opto-CTRL does not exhibit any**
- 2 **preferential localization and cannot induce any phenotypic changes in terms of migration,**
- 3 **polarity, or protrusion formation. (A and B) Time-lapse snapshots (A) and time-stack (B)**
- 4 **demonstrate the unaltered cell morphology and migration behavior in polarized *Dictyostelium***
- 5 **cells upon recruitment of Opto-CTRL. Numbers are time in seconds (A). 488 nm switched ON**
- 6 **globally at t=0s. Yellow arrows: Opto-CTRL is uniform over cortex and did not move away**

1 from protrusions (B). **(C-F)** Quantification of cell morphology and migration mode in terms of  
2 cell circularity index (C), cell tracks (D), migration speed (E), and new protrusion formation  
3 frequency (F), upon Opto-CTRL recruitment (n=25 cells). Data shown as mean  $\pm$  SEM over time  
4 in (C). In (D-F), for either before or after recruitment tracks, each cell tracked for  $n_f=40$  frames  
5 ( $t=320$  s). Tracks were reset to the same origin in (D). For pairwise comparison, tracks are color-  
6 coded in (d), data from same cell are connected by gray line in (E) and (F). **(G)** Schematic  
7 proposing how Opto-ACTU+ recruitment changes cell morphology and migratory mode. Opto-  
8 ACTU+ is recruited globally as expected (I to II); however, presumably due to its positive  
9 charge, it quickly accumulates along the back regions of the cell (III). Consequently, new  
10 protrusions are elicited from these back regions and the cell begins to lose polarity (IV and V).  
11 And at the same time, as some areas of erstwhile back regions are converted to front, Opto-  
12 ACTU+ redistributes again to the newly formed back regions (IV to VII). This in turn generates  
13 fresh protrusions there and this entire cycle is repeated (shown in arrows between VI and VII).  
14 As a result of this series of events, protrusions are generated randomly, migration becomes  
15 impaired, and pre-existing polarity is abrogated.

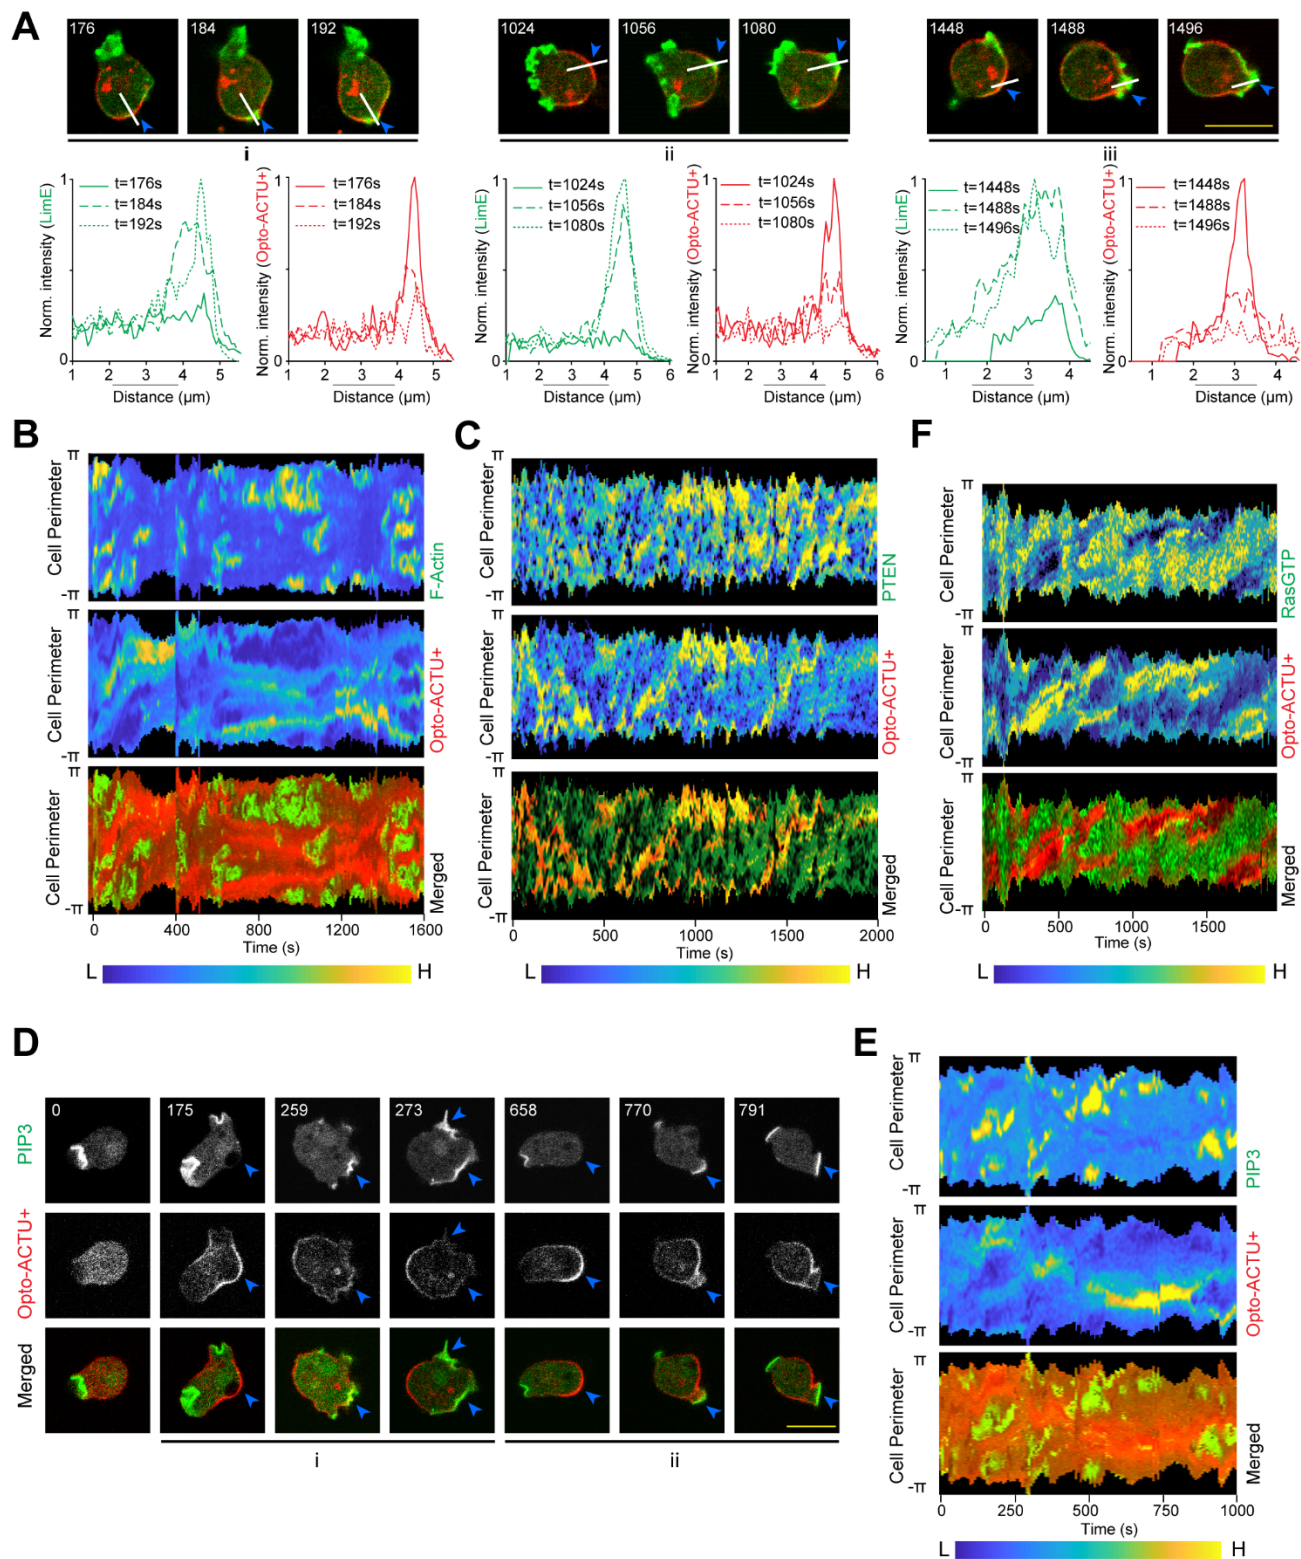



1 **Figure S9. Global recruitment of Opto-ACTU+ can cause spatiotemporally confined**  
2 **activation of Ras/PI3K/Akt/TORC2/F-actin network components. (A)** Intensity profiles of  
3 newly polymerized F-actin biosensor LimE-GFP and Opto-ACTU+ along the white lines (the  
4 images are same as shown in Fig. 5b) demonstrate that F-actin polymerizes in the domains of  
5 membrane where Opto-ACTU+ accumulates and when that leads to a protrusion, Opto-ACTU+  
6 moves away with a short time delay. **(B)** 360° membrane kymograph of cell shown in Fig. 5B.  
7 **(C)** 360° membrane kymograph of cell shown in Fig. 5C. **(D)** 360° membrane kymograph of cell  
8 shown in Fig. 5D. **(E)** Time-lapse live cell images of *Dictyostelium* cells co-expressing Opto-  
9 ACTU+, cAR1-CIBN, and PIP3 biosensor PH<sub>Crac</sub> where recruitment was started at t=0s.  
10 Numbers show time in seconds. The “i” and “ii” are showing two different PIP3 production  
11 events which eventually lead protrusion formation. For each event, blue arrowheads in are  
12 showing the areas where Opto-ACTU+ was first accumulated which in turn became the areas of  
13 PIP3 production and eventually after protrusion formation, Opto-ACTU+ moved away to a  
14 newer back-state area. **(F)** 360° membrane kymograph of cell shown in (E).

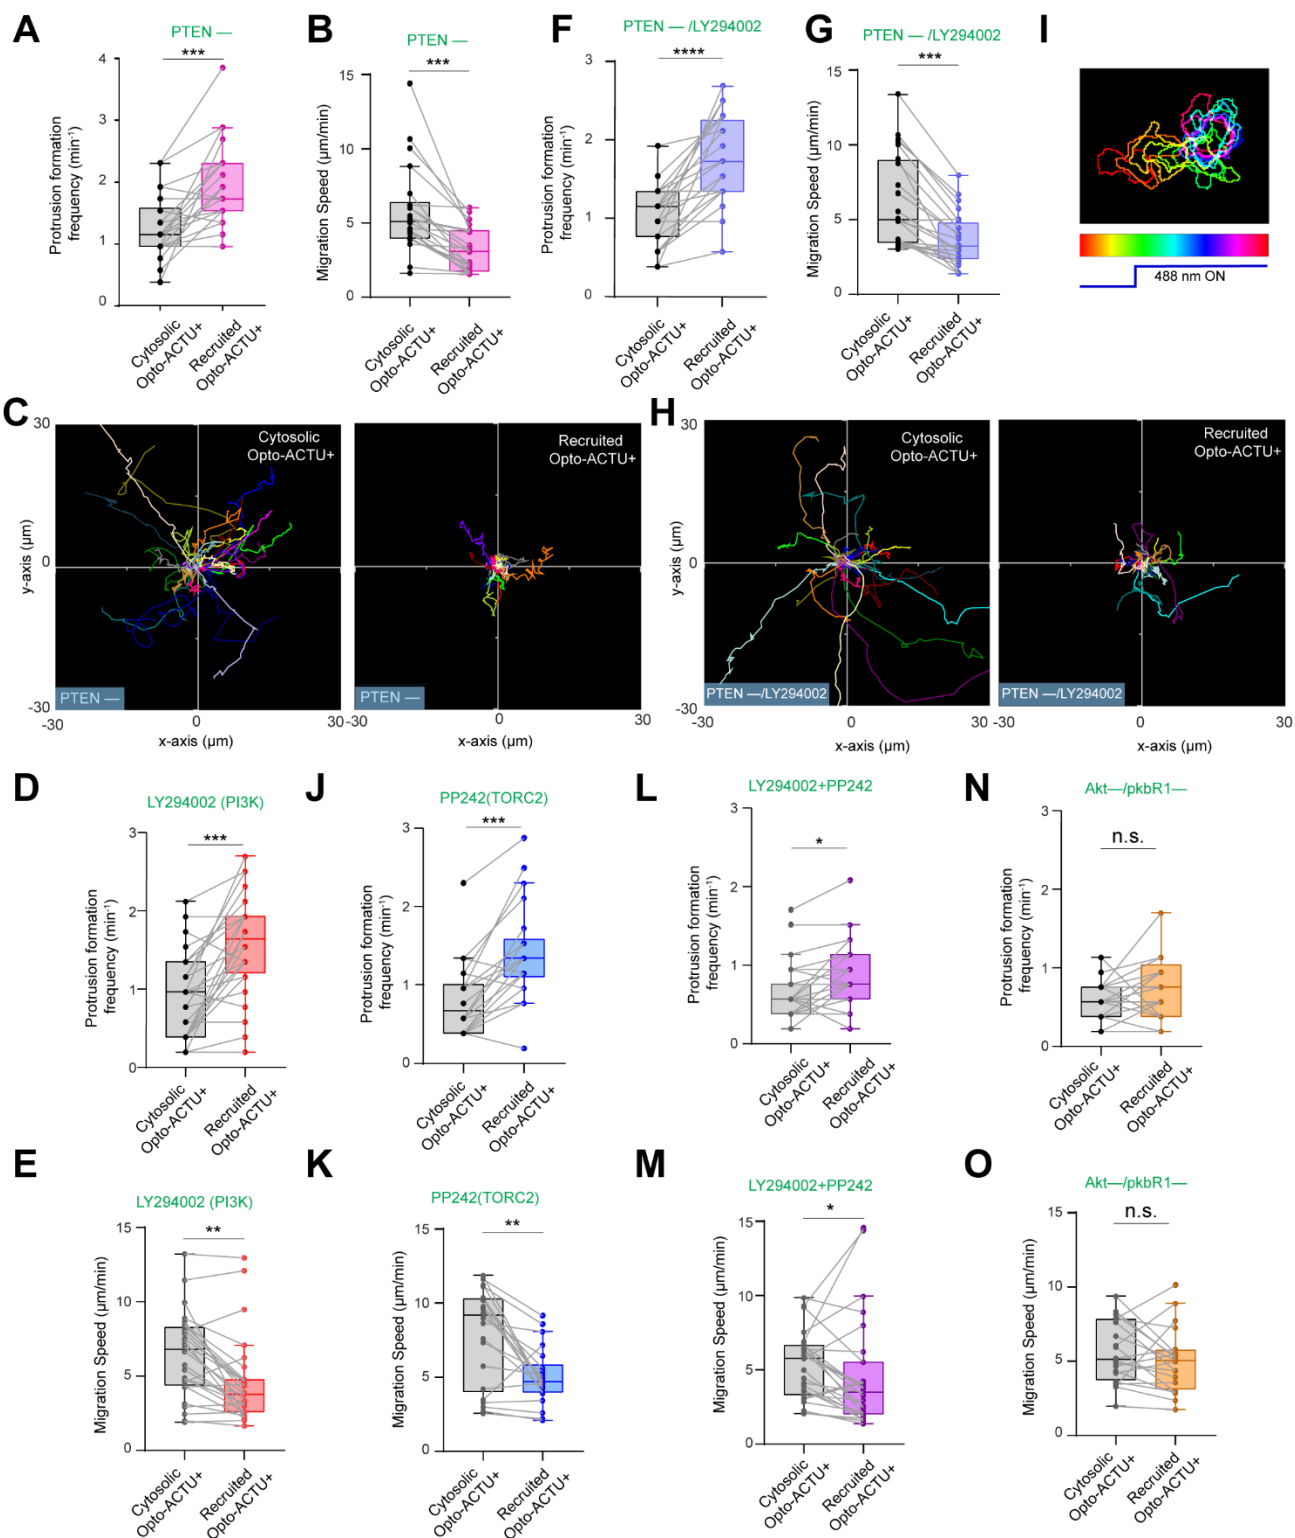

1 **Figure S10. The effect of specific genetic and pharmacological inhibitions upon the**  
2 **phenotypic changes induced by Opto-ACTU+ recruitment. (A-C)** Quantification of  
3 migration profile changes in terms of new protrusion formation frequency (A), speed (B), and  
4 cell tracks (C), upon Opto-ACTU+ recruitment, in PTEN<sup>-</sup> *Dictyostelium* cells;  $n_c=22$  cells. **(D,**  
5 **E)** Quantification of migration profile changes in terms of new protrusion formation frequency  
6 (D) and speed (E), upon Opto-ACTU+ recruitment in *Dictyostelium* cells, pre-treated with PI3K  
7 inhibitor LY294002;  $n_c=28$  cells. **(F-H)** Quantification of migration profile changes in terms of  
8 new protrusion formation frequency (F), speed (F), and cell tracks (H), upon Opto-ACTU+  
9 recruitment in PTEN<sup>-</sup> *Dictyostelium* cells, pre-treated with PI3K inhibitor LY294002;  $n_c=24$   
10 cells. **(I)** Temporally color-coded cell outlines of a representative migrating PTEN<sup>-</sup>  
11 *Dictyostelium* cells, pre-treated with PI3K inhibitor LY294002, showing cell morphology and  
12 migratory profile before and after 488nm was turned on to recruit Opto-ACTU+ (corresponding  
13 to Video S11). **(J-O)** Quantification of migration profile changes in terms of new protrusion  
14 formation frequency (J, L, N) and migration speed (K, M, O) upon Opto-ACTU+ recruitment  
15 under different genetic and pharmacological inhibitions. In (J-K) cells were pre-treated with  
16 PP242 to inhibit TORC2 ( $n_c=22$  cells); in (L-M) cells were pre-treated with both LY294002 and  
17 PP242 to simultaneously block PI3K and PP242 ( $n_c=27$  cells); in (K-L), Akt<sup>-</sup>/PKBR1<sup>-</sup> double  
18 knockout cell line was used ( $n_c=21$  cells). For each case, each of the  $n_c$  cells were tracked for  
19  $n_f=40$  frames (8 sec/frame was imaging frequency) and time averages were taken. Tracks were  
20 reset to the same origin in (C) and (H). For pairwise comparison, tracks are color-coded in (C)  
21 and (H). In all box plots here, for pairwise comparison, data from same cell are connected by  
22 gray lines. The p-values by Mann-Whitney-Wilcoxon test.

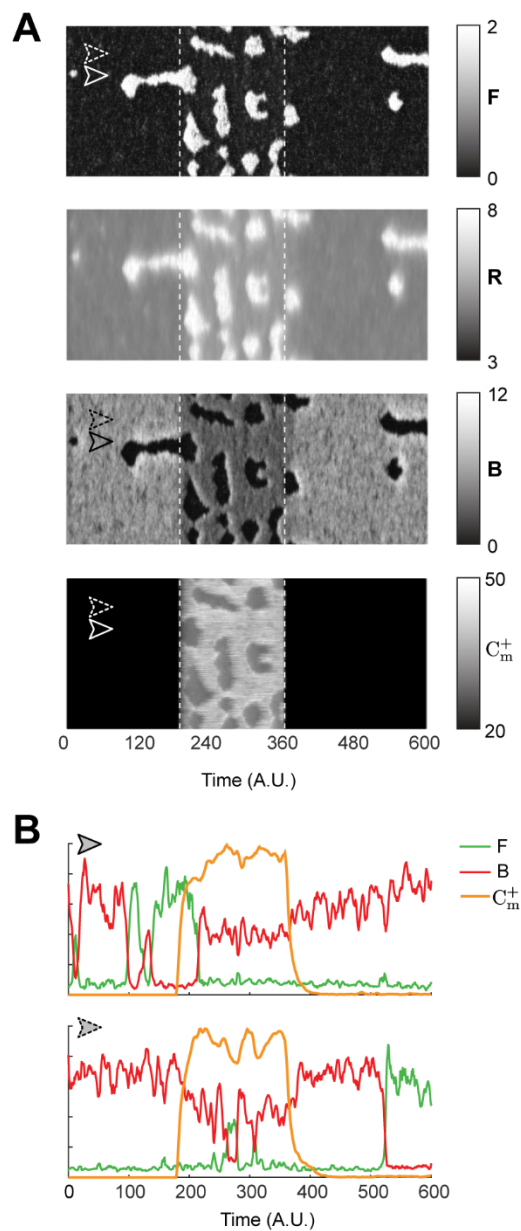

- 1 **Figure S11. In silico reversible recruitment of Opto-ACTU+ can recreate the reversibility**
- 2 **of polarity breaking and protrusion formation events that was observed experimentally.**
- 3 **(A) The simulated kymographs of F (first), R (second), B (third) and  $C_m^+$  (fourth) in response to**
- 4 **global reversible recruitment. The instant of recruitment is shown by the first white dashed line**

- 1 and recruitment was stopped in the second dashed line. **(B)** Line scans at two locations (denoted
- 2 by dashed and solid arrows) on the simulated kymographs showing the temporal profiles of F
- 3 (green), B (red) and  $C_m^+$  (orange).

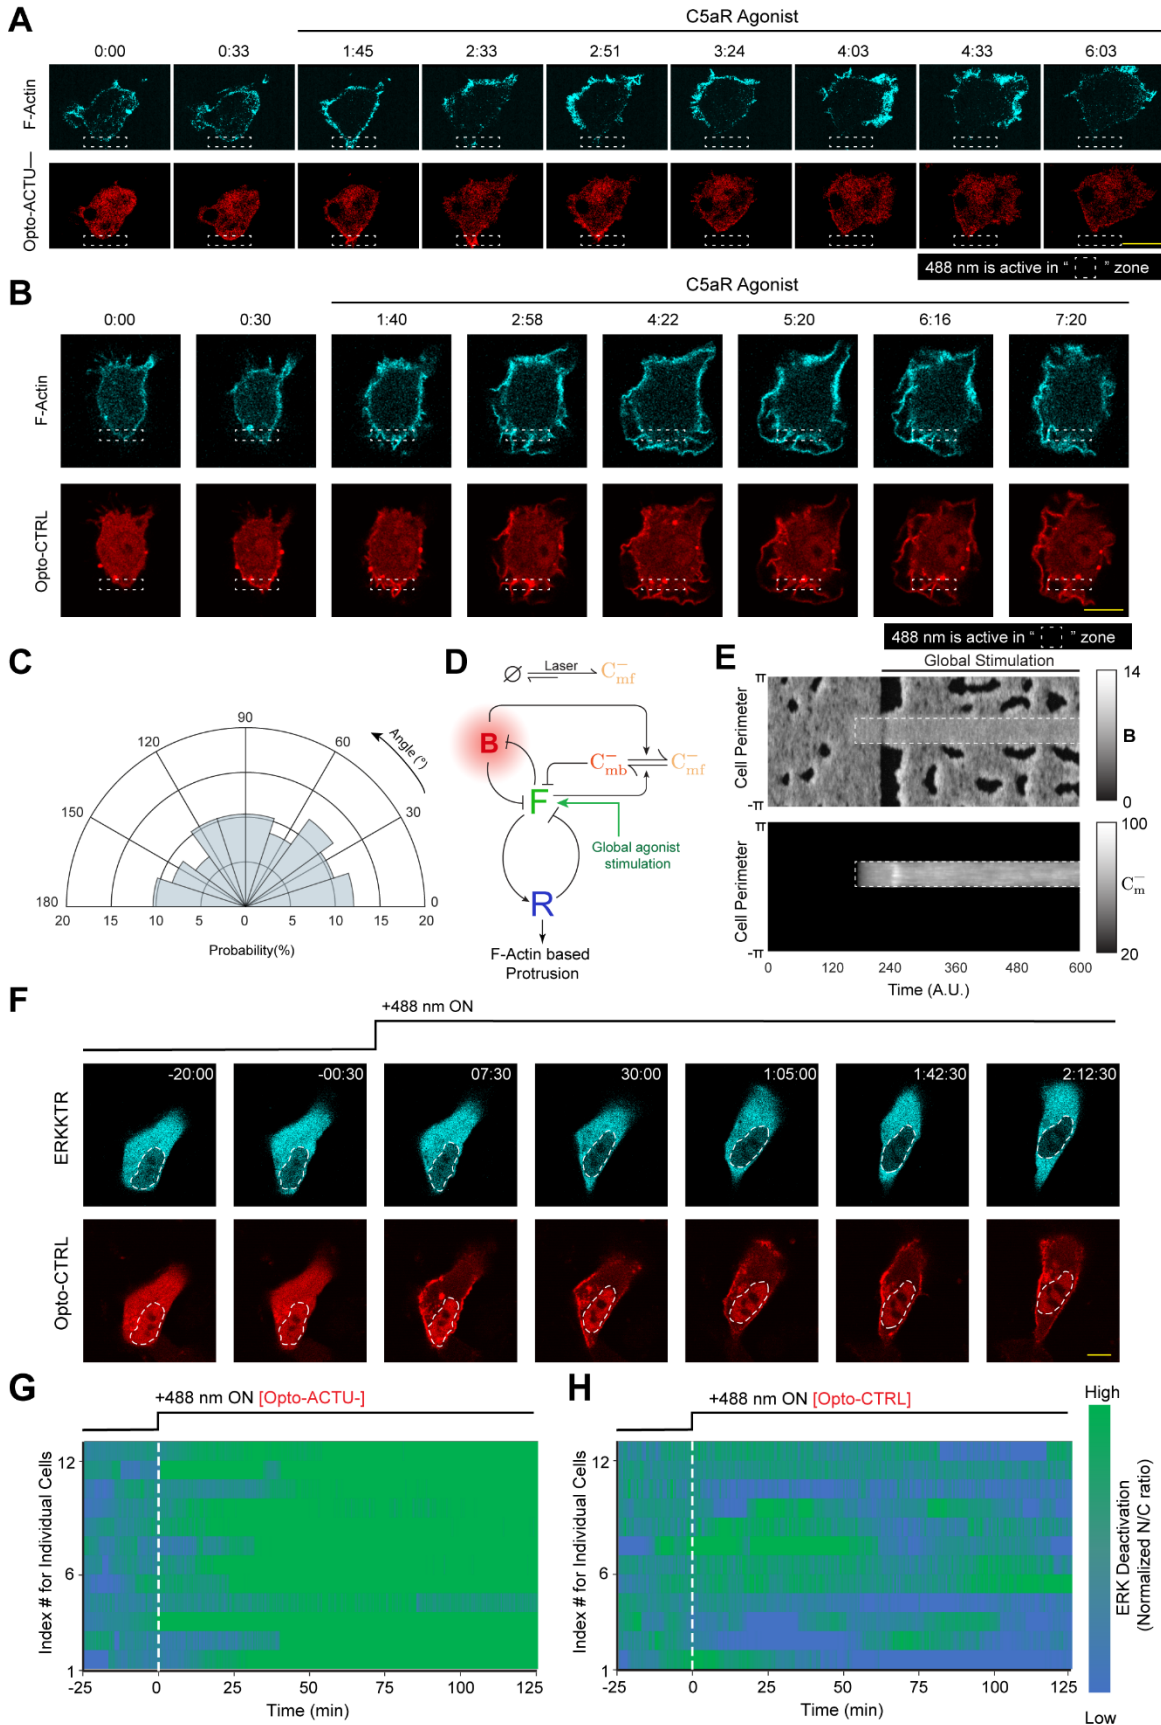

1 **Figure S12. Selective recruitment of uncharged control Opto-CTRL cannot suppress**  
2 **protrusion in RAW 264.7 macrophages or deactivate ERK in MCF10A cells. (A)**  
3 Representative live-cell time-lapse images of RAW 264.7 cells undergoing light-triggered  
4 spatially confined recruitment of Opto-CTRL, followed by global stimulation by C5a receptor  
5 agonist, demonstrating selective protrusion suppression in the site where Opto-CTRL was  
6 locally recruited and robust protrusion formation in other areas of cortex. Time in min:sec  
7 format. Cells were co-expressing Opto-CTRL, CIBN-CAAX, and Lifeact-mVenus. **(B)**  
8 Representative live-cell time-lapse images of RAW 264.7 cells undergoing light-triggered  
9 spatially confined recruitment of Opto-CTRL, followed by global stimulation by C5a receptor  
10 agonist. Time in min:sec format. Cells were co-expressing Opto-CTRL, CIBN-CAAX, and  
11 Lifeact-mVenus. **(C)** Polar histogram indicating probability of protrusion formation is essentially  
12 uniform over the cortex;  $n_c=12$  cells,  $n_p=59$  protrusions. **(D)** Schematic showing coupled system  
13 of excitable network, polarity module and Opto-CTRL system along with global agonist  
14 stimulation. **(E)** The simulated kymographs of  $B$  (top) and  $C_m^-$  (bottom) in response to local  
15 recruitment of Opto-CTRL. The location of recruitment is denoted by the white dashed box.  
16 The solid black line denotes the span of global agonist stimulation. **(F)** Representative live-cell  
17 time-lapse images of a MCF10A cell displaying ERKTR maintaining its cytosolic distribution  
18 upon Opto-CTRL recruitment, demonstrating no substantial ERK deactivation; cells were pre-  
19 treated with and maintained in a saturated dose of EGF throughout the experiment. Time in  
20 hr:min:sec format; 488 nm laser was first turned ON at  $t=0$  min. **(G and H)** Individual cell level  
21 changes in the nuclear/cytosolic ratio of ERKTR over time, upon recruitment of Opto-CTRL  
22 (G) or Opto-CTRL (H). Population average is in Figure 7I. The color scale shown in right is  
23 applicable to both panels.

| Sensor name                | Charge | # of AA | Sequence                   |
|----------------------------|--------|---------|----------------------------|
| R(+8)-Pre                  | +8     | 18      | ARDGRRRRRRARARCVIM         |
| R(+7)-Pre                  | +7     | 18      | ARDGRQRRRRARARCVIM         |
| R(+4)-Pre                  | +4     | 18      | ARDGRQQQQARARCVIM          |
| R(+2)-Pre                  | +2     | 18      | ARDGQQQQQARARCVIM          |
| Palm/Pre                   | -1     | 19      | LNPPDESGPGMSCKCVLS         |
| cAR1                       | NA     | 533     | DictyBase ID: DDB_G0273397 |
| PM-LYN                     | +2     | 11      | MGCISKGKDS                 |
| PTEN <sub>1-18</sub> -CAAX | +6     | 22      | MSNLLRVAVSKQRRYQKCVIM      |
| RacG <sub>CT</sub>         | +7     | 18      | SKEKKNNKKFKKNCIIM          |

C: farnesylation  
C: palmitoylation  
G: myristoylation

- 1 **Table S1** | Different charge sensors and membrane marker controls. For each one, the net charge,
- 2 sequence length, and exact sequence or reference is listed. Green color denotes positively
- 3 charged amino acids and red color denotes negatively charged amino acids.



| Parameter | Value                         | Parameter   | Value               | Parameter       | Value                         |
|-----------|-------------------------------|-------------|---------------------|-----------------|-------------------------------|
| $a_1$     | $9.2 \times 10^{-3}^\dagger$  | $F_T$       | 4.0                 | $k$             | $0.55^\dagger$                |
|           | $8.3 \times 10^{-3}^\ddagger$ |             |                     |                 | $0.50^\ddagger$               |
| $a_2$     | $0.92^\dagger$                | $b_1$       | $11.1^\dagger$      | $\varepsilon_w$ | $0.2^\dagger$                 |
|           | $0.83^\ddagger$               |             |                     |                 | $0.1^\ddagger$                |
| $a_{30}$  | $10.24^\dagger$               | $b_2$       | $11.1^\dagger$      | $d_1$           | $5.55^\dagger$                |
|           | $10.39^*$                     |             |                     |                 | $1.11^*$                      |
|           | $9.35^\ddagger$               |             |                     |                 | $99.8^\ddagger$               |
| $a_3$     | $1.0^\dagger$                 | $b_3$       | $0.06-0.07^\dagger$ | $d_2$           | $0.17^\dagger$                |
|           | $0.1^\ddagger$                |             |                     |                 | $0.01^*$                      |
| $a_4$     | $0.22^\dagger$                | $c_1$       | $0.05^\dagger$      | $d_3$           | $0.44^\dagger$                |
|           | $0.24^*$                      |             |                     |                 | $1.0 \times 10^{-3}^\ddagger$ |
|           | $0.21^\ddagger (t \leq t_s)$  |             |                     |                 |                               |
|           | $0.20^\ddagger (t > t_s)$     |             |                     |                 |                               |
| $a_5$     | $0.08^\dagger$                | $c_2$       | $0.28^\dagger$      | $d_4$           | $5.55 \times 10^{-3}^\dagger$ |
|           | $0.07^\ddagger$               |             |                     |                 | $0.8^\ddagger$                |
| $a_6$     | 10                            | $R_T$       | 8.5                 | $D_{C_{mf}^+}$  | 10                            |
| $D_F$     | $11.25^\dagger$               | $D_W$       | 0.1                 | $D_{C_{mb}^+}$  | 0.001                         |
|           | $9.0^\ddagger$                |             |                     |                 |                               |
| $D_R$     | $22.5^\dagger$                | $D_Z$       | 100                 | $D_{C_{mf}^+}$  | 10                            |
|           | $18.0^\ddagger$               |             |                     |                 |                               |
| $D_B$     | $4.95^\dagger$                | $D_{C_m^+}$ | 1                   | $D_{C_{mb}^+}$  | 0.001                         |
|           | $4.5^\ddagger$                |             |                     |                 |                               |
| $a$       | 15                            | $\mu$       | 0                   | $\sigma$        | 0.5                           |

1 **Table S2** | Parameter values for the computational model.

1 **Supplementary Video Legends:**

2

3 **Video S1. Dynamic localization of PI(4,5)P2 to the back-state of the membrane in both**

4 ***Dictyostelium* and RAW 264.7 macrophages.** The spatiotemporal complementary patterns were

5 observed during protrusion formation in *Dictyostelium* (A), ventral wave propagation in

6 *Dictyostelium* (B), and ventral wave propagation in RAW 264.7 macrophages (C). Left panels

7 show PH<sub>PLCδ</sub>-GFP, middle panels show PH<sub>Crac</sub>-mCherry (in A and B) or PH<sub>Akt</sub>-mCherry (in C),

8 and the right panels show the merged view. Top left corners show time in mm:ss format.

9

10 **Video S2. During ventral wave propagation in *Dictyostelium*, PI(3,4)P2 dynamically**

11 **localizes to the back-state of the membrane.** Left panels show PH<sub>CynA</sub>-KikGR, middle panels

12 show PH<sub>Crac</sub>-mCherry, and the right panels show the merged view. Top left corners show time in

13 mm:ss format.

14

15 **Video S3. Dynamic preferential back-state distribution of phosphatidylserine in membrane**

16 **during ventral wave propagation in *Dictyostelium* and RAW 264.7 macrophages. (A)**

17 Ventral wave patterns in *Dictyostelium*. Left panel shows GFP-LactC2, middle panel shows

18 PH<sub>Crac</sub>-mCherry, and the right panel shows the merged view. (B) Ventral wave propagation in

19 RAW 264.7 macrophages. Left panels show overall pattern in the cell; right panels show the

20 pattern in the zoomed-in area corresponding to the white rectangular boxes in the left channel.

21 In either left or right panels, top channels show GFP-LactC2 and bottom channels show PH<sub>Akt</sub>-

22 mCherry. Scale bar is 10 μm. In both (A) and (B), Top left corners show time in mm:ss format.

1

2 **Video S4. Dynamic preferential distribution of generic negative surface charge sensor to**  
3 **the back-state of the membrane in *Dictyostelium*.** The spatiotemporal patterns were observed  
4 during ventral wave propagation (**A**) and protrusion formation (**B**). Left panels show GFP-R(+8)-  
5 Pre, middle panels show PH<sub>crac</sub>-mCherry, and the right panels show the merged view. Top left  
6 corners show time in mm:ss format.

7

8 **Video S5. Dynamic preferential distribution of generic negative surface charge sensor to**  
9 **the back-state of the membrane in ventral waves of RAW 264.7 macrophages.** Left panel  
10 shows GFP-R(+8)-Pre, middle panel shows PH<sub>Akt</sub>-mCherry, and the right panel shows the  
11 merged view. Top left corners showing time in mm:ss format.

12

13 **Video S6. Dissociation of PI4P sensor PHOSH2X2 and PI(4,5)P2 sensor PHPLC $\delta$  upon**  
14 **recruitment of pseudojanin by chemically induced dimerization system in RAW 264.7**  
15 **macrophages. (A and B) Left panels: GFP-PHOSH2X2, Right Panels: Pseudojanin. (C and D)**  
16 **Left panels: GFP-PHPLC $\delta$ , Right Panels: Pseudojanin.** All RAW 264.7 cells are expressing Lyn-  
17 FRB as well. In all cases, rapamycin addition time was indicated by the appearance of white-  
18 colored text “+Rapamycin” in the top middle. Top left corners showing time in mm:ss format.

19

20 **Video S7. Profile of membrane surface charge sensor R(+8)-Pre, upon recruitment of**  
21 **pseudojanin by chemically induced dimerization system in RAW 264.7 macrophages. (A**

1 **and B).** Two examples of Pseudojanin recruitment in RAW 264.7 cells co-expressing GFP-  
2 R(+8)-Pre and Lyn-FRB. Left Panels: GFP-R(+8)-Pre; Right panels: Pseudojanin. Rapamycin  
3 addition time was indicated by the appearance of white-colored text “+Rapamycin” in the top  
4 middle. Top left corners showing time in mm:ss format.

5  
6 **Video S8. Optically confined recruitment of Opto-ACTU+ can trigger protrusions *de novo*.**

7 In (A-D), 488 nm laser was selectively irradiated inside the white rectangular boxes; top left  
8 corners showing time in seconds; untagged cAR1-CIBN was expressed. (A and B) Two  
9 examples of Opto-ACTU+ recruitment into the back-state regions of the membrane showing the  
10 generation of new protrusions in the vicinity of the recruitment. In (A) stage was moved to start  
11 recruitment at time 0s. Left panels: LimE $\Delta$ coil (newly-polymerized F-Actin sensor), right panels:  
12 Opto-ACTU+. (C and D) Two examples of Opto-CTRL recruitment in the back-states of the  
13 membrane, showing no generation of new protrusions from the recruitment areas. Left panels:  
14 LimE $\Delta$ coil (newly-polymerized F-Actin sensor), right panels: Opto-CTRL.

15  
16 **Video S9. Global recruitment of Opto-ACTU+ to the membrane in polarized *Dictyostelium***  
17 **cell elicits random protrusions and abrogates pre-existing polarity and persistent**

18 **migration.** (A) Global optical recruitment of Opto-ACTU+. Left panel: Opto-ACTU+, right  
19 panel: DIC. (B) Global optical recruitment of Opto-CTRL. Left panel: Opto-CTRL, right panel:  
20 DIC. For both (A) and (B): Untagged cAR1-CIBN was expressed. Top left corners show time in  
21 seconds. The time before recruitment shown with a negative sign. The 488 nm laser was turned

1 ON at 0s to initiate the recruitment, as depicted by the appearance of green-colored text “488 nm  
2 ON” in the bottom middle.

3 **Video S10. Cell morphology and migration mode changes upon global recruitment of Opto-**  
4 **ACTU+ are reversible. (A) and (B) demonstrate two examples where Opto-ACTU+ was first**  
5 recruited to the membrane by turning on 488 nm laser (recruitment initiated when white-colored  
6 text “488 nm OFF” switched to green-colored text “488 nm ON” in the videos) which resulted  
7 increased protrusion formation, loss of polarity, and impaired migration; then to reverse the  
8 process, the laser was turned off (when the green-colored text “488 nm ON” switched to white  
9 colored text “488 nm OFF”), Opto-ACTU+ returned to cytosol, and the cell eventually regained  
10 its polarized morphology and migration behavior. Left panels: Opto-ACTU+, right panels: DIC;  
11 untagged cAR1-CIBN was expressed. Top left corners show time in mm:ss format in (A) and in  
12 hh:mm:ss in (B).

13

14 **Video S11. Cell migration mode and morphology changes in a PTEN– *Dictyostelium* cell,**  
15 **pretreated with PI3K inhibitor LY294002, upon global recruitment of Opto-ACTU+. Left**  
16 panels show Opto-ACTU+ and right panels show DIC channel. Untagged cAR1-CIBN was  
17 expressed. Top left corners show time in mm:ss format. The 488 nm laser was turned ON to  
18 initiate the recruitment, as depicted by the appearance of white text “488 nm ON” in the bottom  
19 middle.

20

21

1 **Video S12. Optically confined recruitment of Opto-ACTU- can locally suppress**  
2 **protrusions in RAW 264.7 macrophages.** In both (A)-(C), 488 nm laser was selectively  
3 irradiated inside the white rectangular boxes; untagged CIBN-CAAX was expressed; top left  
4 corners show time in mm:ss format. Either Opto-ACTU- (A and B) or Opto-CTRL (C) was first  
5 locally recruited and then cells were globally stimulated with C5a receptor agonist. The  
6 appearance of white-colored text “+C5aR Agonist” in the videos denoting the addition of the  
7 agonist. Left panels: Lifeact-mVenus; Right panels: Opto-ACTU- (A and B) or Opto-CTRL (C).

8

9

10 **Video S13. Global recruitment of Opto-ACTU- to the membrane in MCF 10A epithelial**  
11 **cells can deactivate the EGF induced ERK activation.** (A) Translocation of ERK-KTR from  
12 cytosol to nucleus upon Opto-ACTU- recruitment. Left panel: ERK-KTR-iRFP713, right panel:  
13 Opto-ACTU-. (B) ERK-KTR maintained its cytosolic distribution upon Opto-CTRL recruitment.  
14 Left panel: ERK-KTR-iRFP713, right panel: Opto-CTRL. In both (A and B), top left corners  
15 showing time in hh:mm:ss format. 488 nm laser was globally turned ON at t=0 (as shown by the  
16 appearance of green-colored text “488 nm ON”). Cells were pre-treated with a saturated dose of  
17 EGF and they were maintained in that condition throughout the experiment.

18

19

20

21

## 1   **METHODS**

2

### 3   **Cell culture**

4   The wild-type *Dictyostelium discoideum* cells of axenic strain AX2 were cultured in HL-5 media  
5   at 22 °C. Hygromycin (50 µg/mL) and/or G418 (30 µg/mL) were added to the media to maintain  
6   cell lines expressing different constructs. PI3K 1<sup>-</sup>/2<sup>-</sup> and PTEN<sup>-</sup> *Dictyostelium* cells were  
7   cultured like AX2 whereas heat-killed *Klebsiella aerogenes* were added in the culture media to  
8   grow PKBA<sup>-</sup>/ PKBR1<sup>-</sup> *Dictyostelium* cells. Cells were usually maintained in petri dishes and  
9   were transferred to shaking culture around 2-4 days before electrofusion or differentiation  
10   experiments. PTEN<sup>-</sup> *Dictyostelium* cells were always grown in petri dishes. All the experiments  
11   were done within 2 months of thawing the cells from the frozen stocks.

12

13   RAW 264.7 macrophage-like cells were obtained from N. Gautam laboratory (Washington  
14   University School of Medicine in St. Louis, MO) and mammary epithelial MCF-10A cells were  
15   obtained from M. Iijima laboratory (Johns Hopkins University School of Medicine, MD). RAW  
16   264.7 cells were grown in Dulbecco's modified Eagle's medium (DMEM) containing 4500mg/L  
17   glucose, L-glutamine, sodium pyruvate, and sodium bicarbonate (Sigma-Aldrich; D6429),  
18   supplemented with 10% heat-inactivated fetal bovine serum (ThermoFisher Scientific;  
19   16140071) and 1% penicillin-streptomycin (ThermoFisher Scientific; 15140122). MCF-10A  
20   cells were cultured in DMEM/F-12 medium with GlutaMAX (ThermoFisher  
21   Scientific;10565042) supplemented with 5% heat-inactivated horse serum (ThermoFisher  
22   Scientific; 26050088), 1% penicillin-streptomycin, epidermal growth factor (EGF) (20 ng/ml)

1 (Sigma-Aldrich; E9644), cholera toxin (100 ng/ml) (Sigma-Aldrich; C8052), hydrocortisone (0.5  
2 mg/ml) (Sigma-Aldrich; H0888), and insulin (10 µg/ml) (Sigma-Aldrich; I1882). All cells were  
3 subcultured every 2-6 days using cell lineage-specific techniques to maintain healthy confluency.  
4 All experiments were done with low passage number cells. All mammalian cells were  
5 maintained under humidified conditions at 37 °C and 5% CO<sub>2</sub>.

6

## 7 **DNA constructs**

8 All sensors and actuators were codon-optimized if used for heterologous expression. R(+8)-Pre  
9 was obtained from the C-terminal tail of KRas4b and all the serines and threonines were mutated  
10 to alanine to prevent phosphorylation and all the lysines were mutated to arginines to avoid  
11 ubiquitination<sup>22</sup>. In R(+7)-Pre, R(+4)-Pre, and R(+2)-Pre, arginines are sequentially mutated to  
12 glutamines to reduce the charge. The cAR1 is a *Dictyostelium* protein that works as a GPCR.  
13 Palm/Pre is the C-terminal tail of HRas. PM-LYN is the first 11 amino acids of the human  
14 Tyrosine-protein kinase LYN. In PTEN<sub>1-18</sub>-CAAX, a CAAX motif was added to the first 18  
15 amino acids PTEN. RacG<sub>CT</sub> is the C-terminal tail of RacG which we identified when we blasted  
16 the KRas4b tail in NCBI Protein BLAST (blastp), with organism specified. Optogenetic actuator  
17 Opto-ACTU<sup>+</sup>, which has a net charge +16, was designed by removing CAAX tail from R(+8)-  
18 Pre (so that it becomes cytosolic) and making a dimer of it, joined by a GGG linker. Optogenetic  
19 actuator Opto-ACTU<sup>-</sup>, which has a net charge -14, was designed using the C-terminal  
20 polyanionic tail sequence of mouse protein Rad17.

21



1 All surface charge sensors and actuators, i.e. GFP-R(+8)-Pre, GFP-R(+7)-Pre, GFP-R(+4)-Pre,  
2 GFP-R(+2)-Pre, GFP-Palm/Pre, GFP-PTEN<sub>1-18</sub>-CAAX, GFP-RacG<sub>CT</sub>, Opto-ACTU<sup>+</sup>, and Opto-  
3 ACTU<sup>-</sup> were generated by annealing the appropriate synthetic oligonucleotides, followed by  
4 restriction enzyme mediated digestion and subcloning into proper *Dictyostelium* or mammalian  
5 vectors. All other constructs were made by PCR amplification followed by standard restriction  
6 enzyme cloning or by site-directed mutagenesis kit (QuickChange II, Agilent Technologies,  
7 200523). All oligonucleotides were obtained from Sigma-Aldrich. All sequences were verified  
8 by diagnostic restriction digest and by standard Sanger sequencing (JHMI Synthesis &  
9 Sequencing Facility).

10  
11 The following plasmid constructs were made in this study. Selected will be deposited on  
12 Addgene/dictyBase and rest will be available from the authors upon direct request: a) GFP-  
13 R(+8)-Pre (pDM358), b) GFP-R(+8)-Pre (pDEXG), c) GFP-R(+7)-Pre (pDEXG), d) GFP-  
14 R(+4)-Pre (pDEXG), e) GFP-R(+2)-Pre (pDEXG), f) GFP-PTEN<sub>1-18</sub>-CAAX (pDEXG), g) GFP-  
15 RacG<sub>CT</sub> (pDEXG), h) GFP-LactC2 (pTX-GFP), i) GFP-Spo20 (pDEXG), j) Opto-ACTU<sup>+</sup>  
16 (pCV5), k) Opto-CTRL (pCV5), l) cAR1-CIBN (pDM358), m) N150<sub>PKBR1</sub>-CIBN (pDM358), n)  
17 Opto-ACTU<sup>-</sup> (pmCherryN1), o) PH<sub>Crac</sub>-Halo (pCV5), p) LimE<sub>Δcoil</sub>-Halo (pCV5).

18 GFP-R(+8)-Pre (mammalian) was from S. Grinstein (Addgene plasmid # 17274), GFP-LactC2  
19 (mammalian) was from S. Grinstein (Addgene plasmid # 22852), GFP-Spo20, originally made  
20 by Vitale et al.<sup>50</sup>, was a kind gift from G. Du (McGovern Medical School, UTHealth), mPlum-  
21 LimE<sub>Δcoil</sub> was from A. Müller-Taubenberger (LMU Munich), pMD2.G was from D. Trono  
22 (Addgene plasmid # 12259), pMDLg/pRRE was from D. Trono (Addgene plasmid # 12251),  
23 pRSV-Rev was from D. Trono (Addgene plasmid # 12253), pLJM1-EGFP was from D. Sabatini

1 (Addgene plasmid # 19319), pCRY2PHR-mCherryN1 (i.e. mammalian Opto-CTRL) was from  
2 C. Tucker (Addgene plasmid # 26866), CIBN-CAAX was from P. De Camilli and O. Idevall-  
3 Hagren (Addgene plasmid # 79574), Lifeact-mVenus was from J. Zhang (Addgene plasmid #  
4 87613), and ERKKTR-iRFP713 was from J. Toettcher (Addgene plasmid # 111510).

5 Rest of the plasmids used in this study were available in Devreotes Lab.

6

## 7 **Transfection**

8 *Dictyostelium* AX2 cells were transfected by standard electroporation protocol. Briefly, for each  
9 transfection,  $10^7$  cells were pelleted, washed twice with ice-cold H-50 buffer, and subsequently  
10 resuspended in 100  $\mu$ L ice-cold H-50 buffer. Around 1-5  $\mu$ g of total DNA was mixed with the  
11 cell suspension and it was transferred to an ice-cold 0.1 cm gap cuvette (Bio-Rad; 1652089) for  
12 electroporation at 850V and 25  $\mu$ F twice, in a 5 second interval (Bio-Rad Gene Pulser Xcell  
13 Electroporation Systems). After a 5 min incubation on ice, electroporated cells were transferred  
14 to a 10 cm Petri dish containing HL-5 media supplemented with heat-killed *Klebsiella aerogenes*  
15 bacteria. Cells were selected by adding hygromycin B (50  $\mu$ g/ml) and/or G418 (20-30  $\mu$ g/ml)  
16 after 1-2 days, as per the antibiotic resistances of the vectors. For optogenetics and chemically-  
17 induced-dimerization experiments where three different protein co-expressions were necessary,  
18 two different pCV5 vectors and one pDM358 vector were used and cells were selected with both  
19 drugs.

20

21 RAW 264.7 cells were transfected by nucleofection in an Amexa Nucleofector II device, using  
22 Amexa Cell line kit V (Lonza; VACA-1003), following a pre-existing protocol<sup>101</sup>. For each

1 transfection,  $3 \times 10^6$  cells were harvested, resuspended in 100  $\mu$ L supplemented Nucleofector  
2 Solution V. Then total 4-6  $\mu$ g of DNA mixtures were added and immediately transferred to a  
3 Lonza cuvette for electroporation using program setting D-032. 500  $\mu$ L of pre-warmed pH  
4 adjusted culture media was added to electroporated cells in the cuvette subsequently. Cell  
5 suspension was then transferred to a 1.5 mL vial and incubated at 37 °C and 5% CO<sub>2</sub> for 10  
6 mins. Next, cells were allowed to attach on coverslip chambers for an hour. 2 mL of pre-warmed  
7 pH adjusted culture media was added to each chamber and cells were further incubated for 4-6  
8 hours before imaging.

9  
10 MCF-10A cells were transiently transfected using Lipofectamine 3000 Transfection Reagent  
11 (ThermoFisher Scientific; L3000001), as per manufacturer's protocol. Briefly, ~0.8  $\mu$ g DNA was  
12 mixed in 160  $\mu$ L serum-free Opti-MEM (ThermoFisher Scientific; 31985062) media containing  
13 3  $\mu$ L Lipofectamine 3000 reagent and incubated for 5-7 mins at RT to allow formation of DNA-  
14 lipid complex. Post-incubation, DNA-lipid complex was added to  $2 \times 10^5$  MCF-10A cells plated  
15 on a 2-well glass chamber. Cells were incubated at 37 °C/5% CO<sub>2</sub> for 5 hours, after which the  
16 DNA-lipid complex was removed, cells were washed thoroughly, and incubated for a further 16  
17 hours before imaging.

18

## 19 **Drugs and reagents**

20 Annexin V, Alexa Fluor 488 conjugate was obtained from ThermoFisher Scientific (Invitrogen;  
21 A13201) and was stored in 4 °C. Latrunculin A (Enzo Life Sciences; BML-T119-0100) was  
22 dissolved in DMSO to make a stock solution of 5 mM. Caffeine (Sigma-Aldrich; C0750) was

1 dissolved in ddH<sub>2</sub>O to make a stock solution of 80 mM. Rapamycin (Sigma-Aldrich; 553210)  
2 was dissolved in DMSO to prepare a 10 mM stock solution. cAMP (Sigma-Aldrich; A6885) was  
3 dissolved in ddH<sub>2</sub>O to make a stock solution of 10 mM. Janelia Fluor 646 HaloTag (Promega  
4 Corporation; GA1120) was dissolved in DMSO to prepare 200 μM stock solution which was  
5 stored in 4 °C and was diluted 1000X during the experiment. C5a receptor agonist FKP-(D-Cha)-  
6 Cha-r (Anaspec; 65121) was dissolved in 1X PBS to make to 2.5 mM stock solution. Anti-BSA  
7 antibody was obtained from Sigma (Sigma-Aldrich; SAB4200688). Stock solution for EGF  
8 (Sigma-Aldrich, E9644) was prepared by dissolving it in 10 mM acetic acid to a final  
9 concentration of 1 mg/ml. Unless otherwise mentioned, everything was stored as small aliquots  
10 in -20 °C.

11

## 12 **Microscopy and live cell imaging**

13 Unless otherwise mentioned, all experiments were performed inside a heated (37 °C) chamber  
14 with a 5% CO<sub>2</sub> supply (in case of mammalian cell imaging), or on a 22 °C stage (in case of  
15 *Dictyostelium* imaging). All time-lapse live-cell images were acquired using one of these four  
16 microscopes: a) Zeiss LSM780-FCS Single-point, laser scanning confocal microscope, (Zeiss  
17 Axio Observer with 780-Quasar; 34-channel spectral, high-sensitivity gallium arsenide  
18 phosphide detectors), b) Zeiss LSM880-Airyscan FAST Super-Resolution Single-point confocal  
19 microscope (Zeiss AxioObserver with 880-Quasar (34-channel spectral, high-sensitivity gallium-  
20 arsenide phosphide detectors), c) Zeiss LSM800 GaAsP Single-point, laser scanning confocal  
21 microscope with wide-field camera, and d) Nikon Eclipse Ti-E dSTROM Total Internal  
22 Reflection Fluorescence (TIRF) Microscope (Photometrics Evolve EMCCD camera).

1 In Zeiss 780 and 800, 488 nm (argon laser) excitation was used for GFP; 561 nm (solid-state)  
2 excitation was used for RFP, mCherry, and mPlum; and 633 nm (diode laser) excitation was  
3 used for iRFP713 and Janelia Fluor 646 HaloTag. In Zeiss 880, 488 nm (argon laser) excitation  
4 was used for GFP; 514 nm (argon laser) excitation was used for YFP and mVenus; 594 nm  
5 (HeNe laser) excitation was used for mCherry; and 633 nm (diode laser) excitation was used for  
6 iRFP713. In Nikon TIRF, 488nm (argon laser) excitation was used for GFP and 561 nm (0.5W  
7 fiber laser) excitation was used for mCherry and RFP. In Zeiss 780, 800, and 880, 40X/1.30  
8 Plan-Neofluar oil objective (with appropriate digital zoom) was used and in Nikon TIRF,  
9 100x/1.4 Plan-Apo oil objective was used. Both 780 and 880 confocal microscopes are operated  
10 by ZEN Black software, 800 confocal microscopes are operated by ZEN Blue software, whereas  
11 the TIRF is controlled by Nikon NIS-Elements. To visualize basal/ventral waves in  
12 *Dictyostelium* and RAW 264.7 cells, either TIRF microscope was used or confocal microscopes  
13 were focused on the very bottom of the cell to capture the substrate-attached surface of the cell.

14

## 15 **Cell differentiation**

16 For *Dictyostelium* cell development,  $8 \times 10^7$  cells of exponential growth phase were collected  
17 from suspension culture and pelleted. After washing twice with DB (Development buffer; 5 mM  
18  $\text{Na}_2\text{HPO}_4$ , 5 mM  $\text{KH}_2\text{PO}_4$ , supplemented with 2 mM  $\text{MgSO}_4$  and 0.2 mM  $\text{CaCl}_2$ ), cells were  
19 resuspended in 4 mL DB and shook at 110 rpm for 1 hour. After 1 hour, the shaking was  
20 continued, and the cells were pulsed with 50-100 nM of cAMP (5 sec pulse every 6 mins) using  
21 a time-controlled peristaltic pump for next 5-6 hours. This allowed the cells to become  
22 developed and polarized. After development, from the shaker, around  $2-5 \times 10^4$  cells were

1 transferred to an 8-well coverslip chamber, resuspended thoroughly in 450  $\mu$ L of DB, and  
2 incubated for 20-30 min before starting the image acquisition.

3

#### 4 **Frustrated phagocytosis and osmotic shock**

5 To visualize ventral waves in RAW 264.7 macrophages, we have slightly modified a pre-existing  
6 protocol<sup>44, 102</sup>. Briefly, Nunc Lab-Tek 8-well coverslip chambers were prewashed with 30%  
7 nitric acid, coated with 1 mg/mL BSA for 3 hours, washed with PBS, and finally incubated with  
8 5  $\mu$ g/mL anti-BSA antibody (1:200 dilution) for 2 hours. Chambers were finally washed two  
9 times with PBS to remove excess antibodies. Before the imaging, transfected RAW cells were  
10 starved in suspension in 1X Ringer's buffer (150 mM NaCl, 5 mM KCl, 1 mM CaCl<sub>2</sub>, 1 mM  
11 MgCl<sub>2</sub>, 20 mM HEPES and 2 g/L glucose, pH 7.4) for 30 min. Next, these cells were introduced  
12 to the opsonized chambers and allowed to spread on antibody-coated surface for 5-10 min. To  
13 initiate more waves during imaging, hypotonic shock was applied to cells using 0.5X Ringers  
14 solution.

15

16

#### 17 **Electrofusion**

18 Exponential growth phase *Dictyostelium* cells from suspension culture were collected, washed,  
19 and resuspended in 10 mL SB (17 mM Soerensen buffer containing 15 mM KH<sub>2</sub>PO<sub>4</sub> and 2 mM  
20 Na<sub>2</sub>HPO<sub>4</sub>, pH 6.0) at a density of  $1.5 \times 10^7$  cells/ml. The cells were rolled gently in a conical  
21 tube for around 30-40 min to promote visible cluster formation. 800  $\mu$ L of rolled cells were

1 transferred to a 4-mm-gap Bio-Rad electroporation cuvette, using pipette tips with cut off edges  
2 (to ensure clusters remain intact). The electroporation was performed with 1kV, 3  $\mu$ F once, then  
3 with 1kV, 1  $\mu$ F twice more (with 3 s gap between two pulses) to facilitate membrane hemifusion.  
4 35  $\mu$ L of cells were transferred from the cuvette to a Nunc Lab-Tek 8 well chamber and  
5 incubated for 5 more min and then fresh SB buffer supplemented with 2 mM  $\text{CaCl}_2$  and 2 mM  
6  $\text{MgCl}_2$ , was gently added to these cells. Cells were incubated at 22  $^\circ\text{C}$  for next 1-1.5 hours for  
7 recovery before imaging.

8

### 9 **Annexin V binding assay**

10 Growth phase *Dictyostelium* cells were transferred to an 8-well Nunc Lab-Tek coverslip chamber  
11 and allowed to adhere for 10-15 min. Next the HL-5 medium was removed and 450  $\mu$ L DB  
12 buffer was added to the cells. Cells were incubated at 22  $^\circ\text{C}$  for  $\sim$  60-120 min. After that, the DB  
13 buffer was exchanged with DB buffer with excess calcium (2.5 mM of  $\text{CaCl}_2$  final  
14 concentration) and incubated for 30 min. The coverslip chambers were transferred to ice bath (to  
15 slow down the protrusion formation and withdrawal frequency) and rest of the procedure was  
16 done in ice. Next, 10  $\mu$ L of Annexin V, Alexa Fluor 488 conjugate was added to each well and it  
17 was allowed to bind for 45-60 sec. Then the media (containing Annexin V, Alexa Fluor 488  
18 conjugate) was aspirated and was quickly washed for two times using DB with excess calcium  
19 buffer to get rid of all unbound Annexin V. Cells were then fixed without permeabilization,  
20 using 2% paraformaldehyde and 0.25% Glutaraldehyde in HL-5 (with 2.5 mM of  $\text{Ca}^{2+}$ ) for 15  
21 min and then washed twice and finally put under DB with excess calcium for imaging.

22

1

2

### 3 **Gradient stimulation assay**

4 Gradient stimulation assay by cAMP-filled needle was performed as per the established  
5 protocol<sup>103, 104</sup>. *Dictyostelium* cells co-expressing PH<sub>crac</sub>-mCherry and GFP-R(+8)-Pre were  
6 differentiated (as per above mentioned protocol) for 5.5-6.5 hours and were put under cAMP  
7 gradient. Cells were pre-treated with LatA to inhibit cytoskeletal activities. A 10  $\mu$ M cAMP-  
8 filled micropipette connected to a micromanipulator was used to provide the gradient  
9 stimulation. A microinjector connected to the micromanipulator was employed in a continuous  
10 injection mode with a compensation pressure of 70 hPa.

11

12

### 13 **Chemically induced dimerization**

14 The plasmids and experimental details of CID system were mostly described in our previous  
15 reports<sup>9, 57</sup>. Here, to generate Fig. 2, E to I and fig. S5, E to G, two following combinations were  
16 used to express the systems: a) cAR1-FKBP-FKBP (pCV5) as membrane anchor, mCherry-FRB-  
17 Inp54p (pCV5) as recruitee, GFP-R(+8)-Pre (pDM 358) as readout; and b) cAR1-FKBP-FKBP  
18 (pDM 358) as membrane anchor, mCherry-FRB-Inp54p (pCV5) as recruitee, PH<sub>PLC $\delta$</sub> -YFP  
19 (pCV5) as readout. Growth phase *Dictyostelium* cells were transferred to an 8-well coverslip  
20 chamber and incubated for 10-15 min so that they can adhere well. Then, the HL-5 medium was  
21 replaced with 450  $\mu$ L of DB buffer. After 15-20 min of media change, image acquisition was



1 started. To facilitate recruitment of Inp54p to plasma membrane, after imaging a certain number  
2 of frames, rapamycin was added gently to the chamber (to final concentration 5 $\mu$ M) during  
3 image acquisition. In case of Fig 2I, first it was ensured that the Inp54p was recruited to the  
4 membrane by looking at a few confocal slices at the middle of the cell, then focused to the  
5 substrate-attached surface to visualize waves.

6

### 7 **Optogenetic regulation of cell migration**

8 To analyze the effect of surface charge lowering on cell polarity and migration pattern,  
9 *Dictyostelium* cells was selected against both Hygromycin and G418 to co-express LimE $\Delta$ coil-  
10 Halo (pCV5), cAR1-CIBN (pDM 358), and Opto-ACTU+ (pCV5) or Opto-CTRL (pCV5). Cells  
11 were properly developed as described in “Cell differentiation” section. After 6-7 hours of  
12 development, around 2-5x10<sup>4</sup> cells were collected from the shaker and transferred to an 8-well  
13 coverslip chamber. Then cells were resuspended thoroughly in 450  $\mu$ L of DB, and incubated for  
14 around 20 min before starting the image acquisition. For experiments presented in Figures 5G,  
15 5H and Figures S10E-S10L, developed *Dictyostelium* cells were incubated with 40  $\mu$ M  
16 LY294002 or 20  $\mu$ M PP242 or both for >45 min in DB buffer before image acquisition was  
17 started. For global recruitment experiments, after imaging  $\geq$ 320 s, the 488 nm Laser was turned  
18 ON globally to initiate recruitment and was intermittently turned on at a lower intensity during  
19 image acquisition (usually for around 970 ms after each 8s) to keep Opto-ACTU+ or Opto-  
20 CTRL on the membrane throughout the imaging. For spatially confined optical recruitment, a  
21 region of interest was drawn and that particular area was illuminated was 488nm laser in  
22 multiple iteration.

1 To analyze the effect of surface charge elevation on cell polarity and migration pattern, RAW  
2 264.7 macrophage cells co-expressing Lifeact-mVenus, CIBN-CAAX, and Opto-ACTU– or  
3 Opto-CTRL was used. After 4-6 hours of nucleofection (as described in “Transfection” section),  
4 media was aspirated from chambers and cells were put in 450  $\mu$ L of new warm HBSS buffer  
5 (Hank’s Balanced Salt Solution) containing 1 g/L of glucose and cells were incubated for another  
6 0.5-1 hour before starting image acquisition. During imaging, first Opto-ACTU– or Opto-CTRL  
7 was selectively recruited first using 488 nm laser (as described above) and subsequently C5a  
8 receptor agonist FKP-(D-Cha)-Cha-r was added (diluted in HBBS; final concentration of 10  $\mu$ M)  
9 and image acquisition was continued.

10

11

12

### 13 **Optogenetic deactivation of ERK**

14 The KTR technology was developed to convert kinase activities into a nucleocytoplasmic  
15 shuttling equilibrium of a genetically coded sensor so that the kinase activity can be visualized  
16 real time and quantitated<sup>105, 106</sup>. Basically, ERKKTR sensor becomes cytosolic to nuclear upon  
17 the deactivation of ERK. To analyze the effect of optogenetic perturbation of negative surface  
18 charge of the inner membrane, MCF10A cells were transfected with ERKKTR-iRFP713 (as  
19 readout), CIBN-CAAX (as membrane anchor), along with Opto-ACTU– or Opto-CTRL (as  
20 recruitee). Transfected cells were incubated overnight in complete culture medium containing  
21 5% horse serum, 10  $\mu$ g/ml, and 20 ng/mL EGF, which facilitated activation of ERK. Imaging was  
22 performed in the same media. After 25 mins of image acquisition, 488 nm Laser was globally

- 1 turned ON to facilitate recruitment and was intermittently turned on during image acquisition to
- 2 keep Opto-ACTU- or Opto-CTRL on the membrane throughout the imaging. ERKKTR
- 3 localization profile was used to quantitate ERK activity over the time.

#### 4 **Image analysis**

5 Image analysis was performed in MATLAB 2019a (MathWorks, Natick, MA, USA) and  
6 Fiji/ImageJ 1.52i (NIH). The results were plotted using MATLAB 2019a, OriginPro 9.0  
7 (OriginLab, Northampton, MA, USA), or GraphPad Prism 8 (GraphPad Software, San Diego,  
8 CA, USA).

9

#### 10 Colocalization study:

11 Image analysis for the colocalization study was performed with custom codes written in  
12 MATLAB 2019a (MathWorks, Natick, MA, USA). As the preprocessing steps, the background  
13 subtraction and the gaussian/top hat filtering were applied to all the images. The cell area from  
14 the background and the bright patches of the protein of interest from the cell area were  
15 segmented using thresholding method.

1 To quantify the extent of colocalization between two proteins of interest, say A and B in a cell,  
2 the following conditional probabilities were computed:

3 1.  $\text{Prob}(A_{\text{high}}|B_{\text{high}})$ : the probability of finding ‘high localization’ of protein A in the  
4 regions of ‘high localization’ of protein B.

5 2.  $\text{Prob}(B_{\text{high}}|A_{\text{high}})$ : the probability of finding ‘high localization’ of protein B in the  
6 regions of ‘high localization’ of protein A.

7 3.  $\text{Prob}(A_{\text{high}}|B_{\text{low}})$ : the probability of finding ‘high localization’ of protein A in the  
8 regions of ‘low localization’ of protein B.

9 4.  $\text{Prob}(A_{\text{low}}|B_{\text{high}})$ : the probability of finding ‘low localization’ of protein A in the  
10 regions of ‘high localization’ of protein B.

11 5.  $\text{Prob}(B_{\text{high}}|A_{\text{low}})$ : the probability of finding ‘high localization’ of protein B in the  
12 regions of ‘low localization’ of protein A.

13 6.  $\text{Prob}(B_{\text{low}}|A_{\text{high}})$ : the probability of finding ‘low localization’ of protein B in the  
14 regions of ‘high localization’ of protein A.

15

16 High and the low localization of a protein is decided by the threshold values assumed in the  
17 segmentation step. If both the proteins, A and B were colocalized in a cell, then the following  
18 inequalities would hold true:

19

20 
$$\text{Prob}(A_{\text{high}}|B_{\text{high}}) > \text{Prob}(A_{\text{high}}|B_{\text{low}}), \quad (\text{a})$$

1  $\text{Prob}(A_{\text{high}}|B_{\text{high}}) > \text{Prob}(A_{\text{low}}|B_{\text{high}}),$  (b)

2  $\text{Prob}(B_{\text{high}}|A_{\text{high}}) > \text{Prob}(B_{\text{high}}|A_{\text{low}}),$  (c)

3  $\text{Prob}(B_{\text{high}}|A_{\text{high}}) > \text{Prob}(B_{\text{low}}|A_{\text{high}}).$  (d)

4

5 The inequality sign would be preserved under the change of ordering. The sign reverses if the  
6 proteins do not colocalize. Clearly in case of the colocalization, the ratio of these conditional  
7 probabilities (from Eqn. (a-d)) will be greater than 1, whereas it will be less than 1 for the cases  
8 of complementary localization. Taking logarithm of these ratios further differentiates these two  
9 cases leading to positive and negative values, respectively. For the concise representation of the  
10 data, we computed the following average of the four ratios of conditional probabilities for each  
11 image frame as follows, and named it as Conditional Probability Index (henceforth CP index):

12

13 
$$\text{CP index}_{A-B,i} = \frac{1}{4} \left[ \log_{10} \left( \frac{\text{Prob}(A_{\text{high}}|B_{\text{high}})}{\text{Prob}(A_{\text{high}}|B_{\text{low}})} \right) + \log_{10} \left( \frac{\text{Prob}(A_{\text{high}}|B_{\text{high}})}{\text{Prob}(A_{\text{low}}|B_{\text{high}})} \right) \right.$$

14 
$$\left. + \log_{10} \left( \frac{\text{Prob}(B_{\text{high}}|A_{\text{high}})}{\text{Prob}(B_{\text{high}}|A_{\text{low}})} \right) + \log_{10} \left( \frac{\text{Prob}(B_{\text{high}}|A_{\text{high}})}{\text{Prob}(B_{\text{low}}|A_{\text{high}})} \right) \right].$$

15

16 For the box and whisker plot representation, we averaged the CP index. over  $n$  frames analyzed  
17 for every cell image (henceforth Avg. CP index.) as follows:

18 
$$\text{Avg. CP index}_{A-B} = \frac{1}{n_f} \sum_{i=1}^{n_f} \text{CP index}_{A-B,i}$$

1 where  $n_f$  ( $\geq 20$ ) is the total number of frames analyzed for a sample.

2

3 *Kymographs:*

4 For the membrane kymographs the cells were segmented against the background following  
5 standard image processing steps with the custom code written in MATLAB 2019b. The  
6 kymographs were created from the segmented cells as previously described (10). A linear  
7 colormap was used for the normalized intensities in the kymographs. For grayscale kymographs,  
8 black indicating the lowest intensity and white the highest whereas in colored kymographs,  
9 lowest intensity was indicated by blue and highest by yellow.

10

11 Line kymographs that accompanied ventral waves were generated in Fiji/ImageJ by drawing a  
12 thick line with line width 8-12 pixel and processing the entire stack in “KymographBuilder”  
13 plugin.

14

15

16 *Line scan intensity profile:*

17 Line scans were performed in Fiji/ImageJ (NIH) by drawing a straight-line segment (using line  
18 tool) inside the cells with line width 8-12 pixel so that we can obtain an average intensity value  
19 and one particularly bright or dim pixel does not skew the result. The intensity values along that  
20 particular line was obtained in green as well as red channels using “Plot Profile” option. The  
21 values were saved and normalized, in OriginPro 9.0 (OriginLab, Northampton, MA, USA). Then

1 the intensity profiles were graphed and finally smoothened using Savitzky-Golay or Adjacent-  
2 Averaging method, using proper boundary conditions. For a particular linescan, the green and  
3 red profiles were smoothed using exact same parameters to maintain consistency.

4  
5

6 *Time-series plot of Membrane/Cytosol ratio:*

7 The cells were segmented into membrane and cytosolic masks following standard image  
8 processing steps with the custom code written in MATLAB 2019b. The average intensities from  
9 the channels were computed for both the masks. The computed intensities were later corrected  
10 for the photobleaching effect by dividing the values by an exponential fit to the temporal profiles  
11 of the respective normalized average intensities in the cell. Finally, we computed the ratios of the  
12 corrected average intensities for different channels. For the plotting of the temporal profiles of  
13 the red channel data we normalized the pre-recruitment average profiles to unity, whereas for the  
14 green channel, the normalization was done using the respective steady-state value.

15  
16

17 *Cell tracking and migration analysis:*

18 To segment the cells, first, using the “Threshold” option of Fiji/ImageJ, image stack was  
19 thresholded based on a proper threshold value so that the generated binary image covers all the  
20 pixels of the cells. Range was not reset and “Calculate threshold for each image” option was  
21 unchecked. Subsequently, using “Analyzed Particles” option, a size-based thresholding was

1 applied and cell masks were generated so that small non-cell particles could be excluded from  
2 further analysis. Next, “Fill holes”, “Erode”, and “Dilate” options were applied sequentially (for  
3 a couple of times, in some cases) to obtain the proper binarized mask for cells. To generate the  
4 migrating cell outlines in Fig. 3I, “Outline” command was operated on binarized masked cells  
5 and finally “Temporal-Color Code” was used. For other plots, “Shape descriptors” and  
6 “Centroid” options was checked inside “Set measurements” menu and “Analyzed Particles”  
7 option was used, this time to obtain the values of centroid coordinates and circularity values  
8 (circularity is  $4*\pi*area/perimeter^2$ ). Then from the replicates of circularity values, mean and  
9 SEM were determined in GraphPad Prism and they were exported to OriginPro for plotting. For  
10 the centroid values, the starting point was set to origin for each track. Basically,  $x'_i = (x_i - x_0)$   
11 and  $y'_i = (y_i - y_0)$  were applied for  $i=0$  to  $(n-1)$ . The new translated coordinates were plotted in  
12 OriginPro to generate the tracks. Same increment colormap was used in before-recruitment and  
13 after-recruitment tracks so that the tracks can be visually compared in a pairwise fashion in Fig.  
14 3F, fig. S7E, and fig. S9B. To get the velocity values, displacement between each two frames  
15 were computed using  $d = \sqrt{(x_{i+1} - x_i)^2 + (y_{i+1} - y_i)^2}$  formula. This displacement was divided  
16 to time interval to compute speed for each case and these speeds were time-averaged over the  
17 frames to generate each datapoint for the migration speed box plots. Based on those data points,  
18 in GraphPad Prism, the box and whiskers were plotted.

19

#### 20 Global protrusion formation analysis:

21 The new protrusion formation frequency in *Dictyostelium* cells upon global recruitment of Opto-  
22 ACTU+ or Opto-CTRL was computed in Fiji/ImageJ. In the stack of the binarized cell masks (as



1 generated in “*Cell tracking and migration analysis*” section), “Stack Difference” command of  
2 “Multi Kymograph” was applied. The stack was inverted using “Invert” command and a size-  
3 based thresholding was performed using “Analyze Particles” command. If required, the resulting  
4 stack was processed further using “Despeckle” command and then protrusion numbers were  
5 manually counted. The numbers were counted for the same frames for which the migration speed  
6 was quantified. To calculate the fraction of membrane state showing front activity in HL-60  
7 neutrophils, we first segmented the cells and binarized cell masks were generated by sequentially  
8 applying “Threshold”, “Analyze Particles”, “Fill holes”, “Erode”, and “Dilate” options (as  
9 described above in “*Cell tracking and migration analysis*” section). The “Perimeter” option was  
10 checked in “Set Measurements” menu and the perimeter of all the cell images the stacks were  
11 obtained by applying “Analyze Particles” command on binarized cell masks. To get the front or  
12 protrusion area, first Lifestack channel was binarized again with a different lower threshold value  
13 (usually 1.5-2 times of the value that was used to binarize the whole cell). On the new stack with  
14 masks, “Erode” and “Dilate” command was applied and a size-based thresholding was  
15 performed using “Analyze Particles” command. The “Skeletonize” command was applied to  
16 obtain single-pixel-wide shapes and the skeletonize stacks were converted to a time-series. A  
17 custom-written Python script was run using the Fiji/ImageJ Jython interpreter to process the  
18 time-series stack so that we can obtain the “longest shortest paths” using the “Analyze Skeleton”  
19 option. Finally, using a custom-written MATLAB code, the longest shortest paths were added for  
20 each frame. This was divided by the perimeter values to determine the fraction of front in each  
21 frame and then a time-average was determined for required time intervals to generate each data  
22 point for the box and whisker plot. All box plots were generated in GraphPad Prism.

23

1 *Selective protrusion formation analysis:*

2 To perform the selective protrusion formation analysis upon optically confined recruitment of  
3 Opto-ACTU+, Opto-ACTU-, and Opto-CTRL, we segmented the recruitment area on the  
4 membrane with proper threshold. We then marked the area using the segmented line tool. Using  
5 a custom-written ImageJ Macro, “Fit spline” and “Straighten” commands were sequentially  
6 operated. The macro was then used to find and mark the midpoint. The centroid of the entire cell  
7 was also found and marked using another macro. Using the angle tool, considering the centroid  
8 as vertex, the angles between protrusions and the midpoint of the recruitment areas were  
9 obtained. Values were imported to MATLAB and plotted using the “polarhistogram” command.  
10 Sturges’ formula was used to determine the minimum number of bins.

11

12 *KTR translocation analysis:*

13 The nucleus to cytosol ratio of ERKKTR was computed over the time to quantitate the extent of  
14 ERK deactivation upon Opto-ACTU- or Opto-CTRL recruitment. The cells were first segmented  
15 in Fiji/ImageJ by sequentially applying “Threshold”, “Analyze Particles”, “Fill holes”, “Erode”,  
16 and “Dilate” options (as described in detail in “*Cell tracking and migration analysis*” section).  
17 Using “Analyze Particles” option, the whole cell intensities were obtained. Nucleus intensities  
18 was obtained manually by selecting nucleus from the phase channels of the stack. The cytosolic  
19 intensities were found by subtracting nuclear intensity from the whole cell intensity. After ratios  
20 were found, a conditional formatting rule was applied in Microsoft Excel to generate heat maps  
21 in fig. S12, B and C. The ratios were further imported to GraphPad Prism to calculate mean and  
22 SEM and those are plotted in OriginPro to generate the time-series of plot Fig. 4I.

## 1 **Computational model**

2

### 3 Excitable signal transduction system:

4 The excitable system consists of three states – F, B, and R. The system dynamics can be  
5 described by the stochastic partial differential equations (SPDE) as follows:

6

$$7 \quad \frac{\partial F}{\partial t} = -(a_1 + a_2 R)F + \left( \frac{a_{30} + a_3(Z - W)}{a_4^2 + B^2} + a_5 \right) (F_T - F) + D_F \nabla^2 F + w_F = P_F(\cdot) + D_F \nabla^2 F + w_F, \quad (1)$$

$$8 \quad \frac{\partial B}{\partial t} = b_1 - b_2 FB + D_B \nabla^2 B + w_B = P_B(\cdot) + D_B \nabla^2 B + w_B, \quad (2)$$

$$9 \quad \frac{\partial R}{\partial t} = -c_1 R + c_2 F(R_T - R) + D_R \nabla^2 R + w_R = P_R(\cdot) + D_R \nabla^2 R + w_R, \quad (3)$$

10

11 where  $F_T, R_T$  are the total amount of F and R, respectively. The stochasticity affecting state X is  
12 introduced through the signal,  $w_X$  representing the white noise process with respective variance  
13  $\sigma_X^2 \propto P_X(\cdot)$ . Eqn. (1-3) is the manifestation of the standard activator-inhibitor system where F is  
14 the fast activator and R is the slow inhibitor. The original auto catalytic loop around the activator  
15 is replaced by the mutual inhibitory interactions between F and B. First two reaction terms in  
16 Eqn. (1) represent the basal and R-dependent inactivation of F, respectively. The third reaction  
17 term represents the nonlinear activation with a negative feedback from B along with the positive

1 feedback from the downstream polarity module (discussed later). The fourth term involves the  
2 linear basal activation rate. The reaction terms in Eqn. (2) involve basal activation and F-  
3 dependent deactivation of B, respectively. In the Eqn. (3), the reaction terms represent the  
4 deactivation and F-dependent activation of R. The total amounts of F and R are conserved in the  
5 system.

6

7

8

9 *Polarity Mechanism:*

10 To simulate the behavior of polar cells, we coupled the excitable system with a two-component  
11 biasing network based on the local excitation and global inhibition (LEGI) principle <sup>84</sup>:

12

13 
$$\frac{\partial Z}{\partial t} = k(R - Z) + D_Z \nabla^2 Z + w_4, \quad (4)$$

14 
$$\frac{\partial W}{\partial t} = \epsilon_w k(R - W) + D_w \nabla^2 W + w_5, \quad (5)$$

15

16 where Z is the fast, local activator and W is the slow ( $\epsilon_w < 1$ ), globally diffusing ( $D_w \gg D_Z$ )  
17 inhibitor. Both activator and the inhibitor of the polarity mechanism are activated by R of  
18 upstream excitable system. The output of this biasing network ( $Z - W$ ) positively affects the  
19 nonlinear activation of F thus increasing the probability of firing at the former firing locations  
20 and resulting long lived patches of F activity.

1

2 Positively Charged Actuator Dynamics:

3 To model the partitioning of the uniformly recruited charge sensors on the membrane, we  
 4 considered two populations of charge sensors – fast diffusing,  $C_{mf}$  and slow diffusing  $C_{mb}$   
 5 ( $D_{C_{mf}^+} \gg D_{C_{mb}^+}$ ). The system dynamics assumed for the positive charge actuator (Opto-ACTU+)  
 6 is given by,

7

8 
$$\frac{\partial C_{mf}^+}{\partial t} = \epsilon_L(d_1 L(x) \mathbb{I}_L(t) - d_2 C_{mf}^+) + d_3 F C_{mb}^+ - d_4 B C_{mf}^+ + D_{C_{mf}^+} \nabla^2 C_{mf}^+ + w_6, \quad (6)$$

9 
$$\frac{\partial C_{mb}^+}{\partial t} = -d_3 F C_{mb}^+ + d_4 B C_{mf}^+ + D_{C_{mb}^+} \nabla^2 C_{mb}^+ + w_7. \quad (7)$$

10

11 The first term in Eqn. (6) represents the spatiotemporal recruitment of charge actuators to the  
 12 membrane. The indicator function  $L(x)$  controls the spatial location(s) of the recruitment whereas  
 13  $\mathbb{I}_L(t)$  controls the instant and the time span. The second term denotes the reverse process. The  
 14 third and the fourth term of Eqn. (6) represent F and B-mediated interconversions of  $C_{mf}^+$  and  
 15  $C_{mb}^+$ . The total positive charge actuators ( $C_m^+$ ) on the membrane is given by,  $C_m^+ = C_{mf}^+ + C_{mb}^+$ .  
 16 The effect of positive charge actuation on the membrane states is incorporated through a negative  
 17 feedback term involving  $C_{mb}^+$  in the B dynamics as follows:

18

19 
$$\frac{\partial B}{\partial t} = b_1 - b_2 F B - b_3 C_{mb}^+ B + D_B \nabla^2 B + w_B.$$

1

2 Negatively Charged Actuator Dynamics:

3 For modeling negative charge actuators, we followed a similar methodology as discussed above.

4 The system dynamics assumed for the negative charge actuator (Opto-ACTU-) is given by,

5

6 
$$\frac{\partial C_{mf}^-}{\partial t} = d_1 L(x) \mathbb{I}_L(t) - d_2 C_{mf}^- + d_3 B C_{mb}^- - d_4 F C_{mf}^- + D_{C_{mf}^-} \nabla^2 C_{mf}^- + w_8, \quad (8)$$

7 
$$\frac{\partial C_{mb}^-}{\partial t} = -d_3 B C_{mb}^- + d_4 F C_{mf}^- + D_{C_{mb}^-} \nabla^2 C_{mb}^- + w_9. \quad (9)$$

8

9 The total negative charge actuators ( $C_m^-$ ) on the membrane is given by,  $C_m^- = C_{mf}^- + C_{mb}^-$ . The

10 effect of negative charge actuation on the membrane states is incorporated through a negative

11 feedback term involving  $C_{mb}^-$  in the F dynamics as follows:

12

13 
$$\frac{\partial F}{\partial t} = -(a_1 + a_2 R) F + \left( \frac{a_{30}(1 + U(t - t_s)) + a_3(Z - W)}{a_4^2 + B^2 + a_6 C_{mb}^-} + a_5 \right) (F_T - F) + D_F \nabla^2 F + w_F.$$

14

15 To mimic the experimental conditions, we reduced the contribution of the polarity mechanism

16 and added an additional term,  $U(t - t_s)$  denoting the global agonist stimulation as follows:

17 
$$U(t - t_s) = \frac{a/0.72}{(t - t_s)\sigma\sqrt{2\pi}} \exp\left(-\frac{(\ln(t - t_s) - \ln a - \mu)^2}{2\sigma^2}\right),$$

1 where  $t_s$  denotes the time instant of application of the global stimulation.

2

3 For the simulation a 1D domain of length 30 A.U was chosen with periodic boundary condition.

4 The parameter values (in A.U.) used in these simulations are provided in Table S2. With the

5 central difference approximation of the spatial second derivatives, the coupled SPDEs were

6 converted to a system of coupled stochastic ordinary differential equations (ODE). The

7 stochastic ODEs were numerically solved using Euler-Maruyama method in MATLAB 2019b

8 (MathWorks, Natick, MA, USA) with the aid of the SDE toolbox. The time and space

9 discretization steps were chosen to be  $\Delta T = 0.001$  A.U. and  $\Delta x = 0.1$  A.U. respectively. All the

10 states were restricted to be strictly nonnegative.

11

## 12 **Statistical analysis**

13 The statistical analyses were performed using MATLAB 2019a (MathWorks, Natick, MA, USA)

14 and GraphPad Prism 8 (GraphPad Software, San Diego, CA, USA). Time-series data was shown

15 as mean  $\pm$  SEM or mean  $\pm$  SD, as indicated in the figure captions. All box plots were graphed

16 following Tukey's convention. Statistical significance and P-values were determined by paired

17 or unpaired two-tailed non-parametric tests as specifically indicated in the figure captions. The

18 following convention was followed to show P-values: ns denotes  $P > 0.05$ , \* denotes  $P \leq 0.05$ , \*\*

19 denotes  $P \leq 0.01$ , \*\*\* denotes  $P \leq 0.001$ , and \*\*\*\* denotes  $P \leq 0.0001$ .

20

- 1 **Data availability:** All data needed to evaluate the conclusions in the paper are present in the
- 2 main text or the supplementary materials. Any additional requests for information or data will be
- 3 fulfilled by the corresponding author upon reasonable request.
  
- 4 **Code availability:** Computational simulation codes will be available upon reasonable request.



1  
2  
3  
4  
5  
6  
7  
8  
9  
10  
11  
12  
13  
14  
15  
16  
17  
18  
19  
20  
21  
22  
23  
24  
25  
26  
27  
28  
29  
30  
31

References

1. Saha, S., Nagy, T. L. & Weiner, O. D. Joining forces: crosstalk between biochemical signalling and physical forces orchestrates cellular polarity and dynamics. *Philos. Trans. R. Soc. Lond. B. Biol. Sci.* **373**, 10.1098/rstb.2017.0145 (2018).
2. Manning, B. D. & Toker, A. AKT/PKB Signaling: Navigating the Network. *Cell* **169**, 381-405 (2017).
3. Devreotes, P. N. *et al.* Excitable Signal Transduction Networks in Directed Cell Migration. *Annu. Rev. Cell Dev. Biol.* **33**, 103-125 (2017).
4. Hoxhaj, G. & Manning, B. D. The PI3K-AKT network at the interface of oncogenic signalling and cancer metabolism. *Nat. Rev. Cancer.* **20**, 74-88 (2020).
5. Ridley, A. J. *et al.* Cell migration: integrating signals from front to back. *Science* **302**, 1704-1709 (2003).
6. Pal, D. S., Li, X., Banerjee, T., Miao, Y. & Devreotes, P. N. The excitable signal transduction networks: movers and shapers of eukaryotic cell migration. *Int. J. Dev. Biol.* **63**, 407-416 (2019)
7. Swaney, K. F., Huang, C. H. & Devreotes, P. N. Eukaryotic chemotaxis: a network of signaling pathways controls motility, directional sensing, and polarity. *Annu. Rev. Biophys.* **39**, 265-289 (2010).
8. Shellard, A., Szabo, A., Trepap, X. & Mayor, R. Supracellular contraction at the rear of neural crest cell groups drives collective chemotaxis. *Science* **362**, 339-343 (2018).
9. Miao, Y. *et al.* Altering the threshold of an excitable signal transduction network changes cell migratory modes. *Nat. Cell Biol.* **19**, 329-340 (2017).
10. Chronopoulos, A. *et al.* Syndecan-4 tunes cell mechanics by activating the kindlin-integrin-RhoA pathway. *Nat. Mater.* **19**, 669-678 (2020).
11. Houk, A. R. *et al.* Membrane tension maintains cell polarity by confining signals to the leading edge during neutrophil migration. *Cell* **148**, 175-188 (2012).
12. Yang, J. M. *et al.* Integrating chemical and mechanical signals through dynamic coupling between cellular protrusions and pulsed ERK activation. *Nat. Commun.* **9**, 4673-9 (2018).
13. Zhan, H. *et al.* An Excitable Ras/PI3K/ERK Signaling Network Controls Migration and Oncogenic Transformation in Epithelial Cells. *Dev. Cell.* **54**, 608-623.e5 (2020).
14. Dai, W. *et al.* Tissue topography steers migrating *Drosophila* border cells. *Science* **370**, 987-990 (2020).

- 1 15. Graziano, B. R. *et al.* Cell confinement reveals a branched-actin independent circuit for  
2 neutrophil polarity. *PLoS Biol.* **17**, e3000457 (2019).
- 3 16. Dang, I. *et al.* Inhibitory signalling to the Arp2/3 complex steers cell migration. *Nature* **503**,  
4 281-284 (2013).
- 5 17. O'Neill, P. R. *et al.* Membrane Flow Drives an Adhesion-Independent Amoeboid Cell  
6 Migration Mode. *Dev. Cell.* **46**, 9-22.e4 (2018).
- 7 18. Lampert, T. J. *et al.* Shear force-based genetic screen reveals negative regulators of cell  
8 adhesion and protrusive activity. *Proc. Natl. Acad. Sci. U. S. A.* **114**, E7727-E7736 (2017).
- 9 19. Fort, L. *et al.* Fam49/CYRI interacts with Rac1 and locally suppresses protrusions. *Nat. Cell*  
10 *Biol.* **20**, 1159-1171 (2018).
- 11 20. Kholodenko, B. N., Hancock, J. F. & Kolch, W. Signalling ballet in space and time. *Nat. Rev.*  
12 *Mol. Cell Biol.* **11**, 414-426 (2010).
- 13 21. McLaughlin, S. & Murray, D. Plasma membrane phosphoinositide organization by protein  
14 electrostatics. *Nature* **438**, 605-611 (2005).
- 15 22. Yeung, T. *et al.* Receptor activation alters inner surface potential during phagocytosis.  
16 *Science* **313**, 347-351 (2006).
- 17 23. Goldenberg, N. M. & Steinberg, B. E. Surface charge: a key determinant of protein  
18 localization and function. *Cancer Res.* **70**, 1277-1280 (2010).
- 19 24. Ma, Y., Poole, K., Goyette, J. & Gaus, K. Introducing Membrane Charge and Membrane  
20 Potential to T Cell Signaling. *Front. Immunol.* **8**, 1513 (2017).
- 21 25. Rickert, P., Weiner, O. D., Wang, F., Bourne, H. R. & Servant, G. Leukocytes navigate by  
22 compass: roles of PI3K $\gamma$  and its lipid products. *Trends Cell Biol.* **10**, 466-473 (2000).
- 23 26. Parent, C. A. & Devreotes, P. N. A cell's sense of direction. *Science* **284**, 765-770 (1999).
- 24 27. Senju, Y. & Lappalainen, P. Regulation of actin dynamics by PI(4,5)P<sub>2</sub> in cell migration and  
25 endocytosis. *Curr. Opin. Cell Biol.* **56**, 7-13 (2019).
- 26 28. Li, X. *et al.* Mutually inhibitory Ras-PI(3,4)P<sub>2</sub> feedback loops mediate cell migration. *Proc.*  
27 *Natl. Acad. Sci. U. S. A.* **115**, E9125-E9134 (2018).
- 28 29. McLaughlin, S. The electrostatic properties of membranes. *Annu. Rev. Biophys. Biophys.*  
29 *Chem.* **18**, 113-136 (1989).
- 30 30. Eisenberg, S. *et al.* Mapping the electrostatic profile of cellular membranes. *Mol. Biol. Cell*,  
31 mbcE19080436 (2020).

- 1 31. Murray, D. *et al.* Electrostatic properties of membranes containing acidic lipids and adsorbed  
2 basic peptides: theory and experiment. *Biophys. J.* **77**, 3176-3188 (1999).
- 3 32. McLaughlin, S. The electrostatic properties of membranes. *Annu. Rev. Biophys. Biophys.*  
4 *Chem.* **18**, 113-136 (1989).
- 5 33. Aguilera, V. M., Verdia-Baguena, C. & Alcaraz, A. Lipid charge regulation of non-specific  
6 biological ion channels. *Phys. Chem. Chem. Phys.* **16**, 3881-3893 (2014).
- 7 34. Heo, W. D. *et al.* PI(3,4,5)P3 and PI(4,5)P2 lipids target proteins with polybasic clusters to  
8 the plasma membrane. *Science* **314**, 1458-1461 (2006).
- 9 35. Alexander, R. T. *et al.* Membrane surface charge dictates the structure and function of the  
10 epithelial Na<sup>+</sup>/H<sup>+</sup> exchanger. *EMBO J.* **30**, 679-691 (2011).
- 11 36. Green, W. N. & Andersen, O. S. Surface charges and ion channel function. *Annu. Rev.*  
12 *Physiol.* **53**, 341-359 (1991).
- 13 37. Ma, Y. *et al.* A FRET sensor enables quantitative measurements of membrane charges in live  
14 cells. *Nat. Biotechnol.* **35**, 363-370 (2017).
- 15 38. Shi, X. *et al.* Ca<sup>2+</sup> regulates T-cell receptor activation by modulating the charge property of  
16 lipids. *Nature* **493**, 111-115 (2013).
- 17 39. Maxson, M. E. & Grinstein, S. The Role of Membrane Surface Charge in Phagocytosis. *Adv.*  
18 *Exp. Med. Biol.* **1246**, 43-54 (2020).
- 19 40. Bagorda, A. & Parent, C. A. Eukaryotic chemotaxis at a glance. *J. Cell. Sci.* **121**, 2621-2624  
20 (2008).
- 21 41. Gerhardt, M. *et al.* Actin and PIP3 waves in giant cells reveal the inherent length scale of an  
22 excited state. *J. Cell. Sci.* **127**, 4507-4517 (2014).
- 23 42. Matsuoka, S. & Ueda, M. Mutual inhibition between PTEN and PIP3 generates bistability for  
24 polarity in motile cells. *Nat. Commun.* **9**, 4481-0 (2018).
- 25 43. Arai, Y. *et al.* Self-organization of the phosphatidylinositol lipids signaling system for  
26 random cell migration. *Proc. Natl. Acad. Sci. U. S. A.* **107**, 12399-12404 (2010).
- 27 44. Masters, T. A., Sheetz, M. P. & Gauthier, N. C. F-actin waves, actin cortex disassembly and  
28 focal exocytosis driven by actin-phosphoinositide positive feedback. *Cytoskeleton*  
29 **73**, 180-196 (2016).
- 30 45. Gerisch, G., Schroth-Diez, B., Muller-Taubenberger, A. & Ecke, M. PIP3 waves and PTEN  
31 dynamics in the emergence of cell polarity. *Biophys. J.* **103**, 1170-1178 (2012).

- 1 46. Swaney, K. F., Borleis, J., Iglesias, P. A. & Devreotes, P. N. Novel protein Callipygian  
2 defines the back of migrating cells. *Proc. Natl. Acad. Sci. U. S. A.* **112**, 3845 (2015).
- 3 47. Yeung, T. *et al.* Membrane phosphatidylserine regulates surface charge and protein  
4 localization. *Science* **319**, 210-213 (2008).
- 5 48. Yeung, T. *et al.* Contribution of phosphatidylserine to membrane surface charge and protein  
6 targeting during phagosome maturation. *J. Cell Biol.* **185**, 917-928 (2009).
- 7 49. Zeniou-Meyer, M. *et al.* Phospholipase D1 production of phosphatidic acid at the plasma  
8 membrane promotes exocytosis of large dense-core granules at a late stage. *J. Biol. Chem.* **282**,  
9 21746-21757 (2007).
- 10 50. Kassas, N. *et al.* Genetically encoded probes for phosphatidic acid. *Methods Cell Biol.* **108**,  
11 445-459 (2012).
- 12 51. Dickson, E. J. & Hille, B. Understanding phosphoinositides: rare, dynamic, and essential  
13 membrane phospholipids. *Biochem. J.* **476**, 1-23 (2019).
- 14 52. Fairn, G. D. *et al.* An electrostatic switch displaces phosphatidylinositol phosphate kinases  
15 from the membrane during phagocytosis. *J. Cell Biol.* **187**, 701-714 (2009).
- 16 53. Ingolfsson, H. I. *et al.* Lipid organization of the plasma membrane. *J. Am. Chem. Soc.* **136**,  
17 14554-14559 (2014).
- 18 54. Leventis, R. & Silviu, J. R. Lipid-binding characteristics of the polybasic carboxy-terminal  
19 sequence of K-ras4B. *Biochemistry* **37**, 7640-7648 (1998).
- 20 55. Jin, T., Zhang, N., Long, Y., Parent, C. A. & Devreotes, P. N. Localization of the G protein  
21 betagamma complex in living cells during chemotaxis. *Science* **287**, 1034-1036 (2000).
- 22 56. Janetopoulos, C., Ma, L., Devreotes, P. N. & Iglesias, P. A. Chemoattractant-induced  
23 phosphatidylinositol 3,4,5-trisphosphate accumulation is spatially amplified and adapts,  
24 independent of the actin cytoskeleton. *Proc. Natl. Acad. Sci. U. S. A.* **101**, 8951-8956 (2004).
- 25 57. Miao, Y. *et al.* Wave patterns organize cellular protrusions and control cortical dynamics.  
26 *Mol. Syst. Biol.* **15**, e8585 (2019).
- 27 58. Hammond, G. R. *et al.* PI4P and PI(4,5)P2 are essential but independent lipid determinants  
28 of membrane identity. *Science* **337**, 727-730 (2012).
- 29 59. Martin, S. *et al.* Immunologic stimulation of mast cells leads to the reversible exposure of  
30 phosphatidylserine in the absence of apoptosis. *Int. Arch. Allergy Immunol.* **123**, 249-258 (2000).

- 1 60. Balasubramanian, K., Mirnikjoo, B. & Schroit, A. J. Regulated externalization of  
2 phosphatidylserine at the cell surface: implications for apoptosis. *J. Biol. Chem.* **282**, 18357-  
3 18364 (2007).
- 4 61. Chung, C. Y., Potikyan, G. & Firtel, R. A. Control of cell polarity and chemotaxis by  
5 Akt/PKB and PI3 kinase through the regulation of PAKa. *Mol. Cell* **7**, 937-947 (2001).
- 6 62. Meili, R., Ellsworth, C. & Firtel, R. A. A novel Akt/PKB-related kinase is essential for  
7 morphogenesis in Dictyostelium. *Curr. Biol.* **10**, 708-717 (2000).
- 8 63. Kamimura, Y. *et al.* PIP3-independent activation of TorC2 and PKB at the cell's leading edge  
9 mediates chemotaxis. *Curr. Biol.* **18**, 1034-1043 (2008).
- 10 64. van Haastert, P. J., Keizer-Gunnink, I. & Kortholt, A. Essential role of PI3-kinase and  
11 phospholipase A2 in Dictyostelium discoideum chemotaxis. *J. Cell Biol.* **177**, 809-816 (2007).
- 12 65. Hoeller, O. *et al.* Two distinct functions for PI3-kinases in macropinocytosis. *J. Cell. Sci.*  
13 **126**, 4296-4307 (2013).
- 14 66. Bhattacharya, S. *et al.* Traveling and standing waves mediate pattern formation in cellular  
15 protrusions. *Sci. Adv.* **6**, eaay7682 (2020).
- 16 67. Huang, C. H., Tang, M., Shi, C., Iglesias, P. A. & Devreotes, P. N. An excitable signal  
17 integrator couples to an idling cytoskeletal oscillator to drive cell migration. *Nat. Cell Biol.* **15**,  
18 1307-1316 (2013).
- 19 68. Weiner, O. D., Marganski, W. A., Wu, L. F., Altschuler, S. J. & Kirschner, M. W. An actin-  
20 based wave generator organizes cell motility. *PLoS Biol.* **5**, e221 (2007).
- 21 69. Bement, W. M. *et al.* Activator-inhibitor coupling between Rho signalling and actin  
22 assembly makes the cell cortex an excitable medium. *Nat. Cell Biol.* **17**, 1471-1483 (2015).
- 23 70. Biswas, D., Devreotes, P. N. & Iglesias, P. A. Three-dimensional stochastic simulation of  
24 chemoattractant-mediated excitability in cells. *PLoS Comput. Biol.* **17**, e1008803 (2021).
- 25 71. Wittmann, T., Dema, A. & van Haren, J. Lights, cytoskeleton, action: Optogenetic control of  
26 cell dynamics. *Curr. Opin. Cell Biol.* **66**, 1-10 (2020).
- 27 72. Tischer, D. & Weiner, O. D. Illuminating cell signalling with optogenetic tools. *Nat. Rev.*  
28 *Mol. Cell Biol.* **15**, 551-558 (2014).
- 29 73. Karunarathne, W. K., O'Neill, P. R. & Gautam, N. Subcellular optogenetics - controlling  
30 signaling and single-cell behavior. *J. Cell. Sci.* **128**, 15-25 (2015).

- 1 74. DeRose, R., Miyamoto, T. & Inoue, T. Manipulating signaling at will: chemically-inducible  
2 dimerization (CID) techniques resolve problems in cell biology. *Pflugers Arch.* **465**, 409-417  
3 (2013).
- 4 75. Inoue, T., Heo, W. D., Grimley, J. S., Wandless, T. J. & Meyer, T. An inducible translocation  
5 strategy to rapidly activate and inhibit small GTPase signaling pathways. *Nat. Methods* **2**, 415-  
6 418 (2005).
- 7 76. Wu, Y. I. *et al.* A genetically encoded photoactivatable Rac controls the motility of living  
8 cells. *Nature* **461**, 104-108 (2009).
- 9 77. Karunaratne, W. K., Giri, L., Patel, A. K., Venkatesh, K. V. & Gautam, N. Optical control  
10 demonstrates switch-like PIP3 dynamics underlying the initiation of immune cell migration.  
11 *Proc. Natl. Acad. Sci. U. S. A.* **110**, 1575 (2013).
- 12 78. O'Neill, P. R., Kalyanaraman, V. & Gautam, N. Subcellular optogenetic activation of Cdc42  
13 controls local and distal signaling to drive immune cell migration. *Mol. Biol. Cell* **27**, 1442-1450  
14 (2016).
- 15 79. Iijima, M., Huang, Y. E., Luo, H. R., Vazquez, F. & Devreotes, P. N. Novel mechanism of  
16 PTEN regulation by its phosphatidylinositol 4,5-bisphosphate binding motif is critical for  
17 chemotaxis. *J. Biol. Chem.* **279**, 16606-16613 (2004).
- 18 80. Vazquez, F. *et al.* Tumor suppressor PTEN acts through dynamic interaction with the plasma  
19 membrane. *Proc. Natl. Acad. Sci. U. S. A.* **103**, 3633-3638 (2006).
- 20 81. Iijima, M. & Devreotes, P. Tumor suppressor PTEN mediates sensing of chemoattractant  
21 gradients. *Cell* **109**, 599-610 (2002).
- 22 82. Wessels, D., Lusche, D. F., Kuhl, S., Heid, P. & Soll, D. R. PTEN plays a role in the  
23 suppression of lateral pseudopod formation during Dictyostelium motility and chemotaxis. *J.*  
24 *Cell. Sci.* **120**, 2517-2531 (2007).
- 25 83. Cai, H. *et al.* Ras-mediated activation of the TORC2-PKB pathway is critical for chemotaxis.  
26 *J. Cell Biol.* **190**, 233-245 (2010).
- 27 84. Shi, C., Huang, C. H., Devreotes, P. N. & Iglesias, P. A. Interaction of motility, directional  
28 sensing, and polarity modules recreates the behaviors of chemotaxing cells. *PLoS Comput. Biol.*  
29 **9**, e1003122 (2013).
- 30 85. O'Neill, P. R. & Gautam, N. Subcellular optogenetic inhibition of G proteins generates  
31 signaling gradients and cell migration. *Mol. Biol. Cell* **25**, 2305-2314 (2014).
- 32 86. Wu, M. & Liu, J. Mechanobiology in cortical waves and oscillations. *Curr. Opin. Cell Biol.*  
33 **68**, 45-54 (2020).

- 1 87. Wu, Z., Su, M., Tong, C., Wu, M. & Liu, J. Membrane shape-mediated wave propagation of  
2 cortical protein dynamics. *Nat. Commun.* **9**, 136-1 (2018).
- 3 88. Rodriguez-Viciana, P. *et al.* Phosphatidylinositol-3-OH kinase as a direct target of Ras.  
4 *Nature* **370**, 527-532 (1994).
- 5 89. Pacold, M. E. *et al.* Crystal structure and functional analysis of Ras binding to its effector  
6 phosphoinositide 3-kinase gamma. *Cell* **103**, 931-943 (2000).
- 7 90. Myers, M. P. *et al.* The Lipid Phosphatase Activity of PTEN is Critical for Its Tumor  
8 Suppressor Function. *Proceedings of the National Academy of Sciences - PNAS* **95**, 13513-13518  
9 (1998).
- 10 91. van den Bogaart, G. *et al.* Membrane protein sequestering by ionic protein-lipid interactions.  
11 *Nature* **479**, 552-555 (2011).
- 12 92. Dathe, M. *et al.* Peptide helicity and membrane surface charge modulate the balance of  
13 electrostatic and hydrophobic interactions with lipid bilayers and biological membranes.  
14 *Biochemistry* **35**, 12612-12622 (1996).
- 15 93. Parthasarathy, R., Cripe, P. A. & Groves, J. T. Electrostatically driven spatial patterns in lipid  
16 membrane composition. *Phys. Rev. Lett.* **95**, 048101 (2005).
- 17 94. Liu, Y., Yan, E. C. Y., Zhao, X. & Eisenhal, K. B. Surface Potential of Charged Liposomes  
18 Determined by Second Harmonic Generation. *Langmuir* **17**, 2063-2066 (2001).
- 19 95. Inagaki, N. & Katsuno, H. Actin Waves: Origin of Cell Polarization and Migration? *Trends*  
20 *Cell Biol.* **27**, 515-526 (2017).
- 21 96. Cheng, X. & Ferrell, J. E. Apoptosis propagates through the cytoplasm as trigger waves.  
22 *Science* **361**, 607-612 (2018).
- 23 97. Yang, H. W., Collins, S. R. & Meyer, T. Locally excitable Cdc42 signals steer cells during  
24 chemotaxis. *Nat. Cell Biol.* **18**, 191-201 (2016).
- 25 98. van Haastert, P. J., Keizer-Gunnink, I. & Kortholt, A. Coupled excitable Ras and F-actin  
26 activation mediates spontaneous pseudopod formation and directed cell movement. *Mol. Biol.*  
27 *Cell* **28**, 922-934 (2017).
- 28 99. Lange, M., Prassler, J., Ecke, M., Muller-Taubenberger, A. & Gerisch, G. Local Ras  
29 activation, PTEN pattern, and global actin flow in the chemotactic responses of oversized cells.  
30 *J. Cell. Sci.* **129**, 3462-3472 (2016).
- 31 100. Xiong, D. *et al.* Frequency and amplitude control of cortical oscillations by  
32 phosphoinositide waves. *Nat. Chem. Biol.* **12**, 159-166 (2016).

- 1 101. Meshik, X., O'Neill, P. R. & Gautam, N. Optogenetic Control of Cell Migration. *Methods*  
2 *Mol. Biol.* **1749**, 313-324 (2018).
- 3 102. Barger, S. R. *et al.* Membrane-cytoskeletal crosstalk mediated by myosin-I regulates  
4 adhesion turnover during phagocytosis. *Nat. Commun.* **10**, 1249-1 (2019).
- 5 103. Cai, H., Huang, C. H., Devreotes, P. N. & Iijima, M. Analysis of chemotaxis in  
6 Dictyostelium. *Methods Mol. Biol.* **757**, 451-468 (2012).
- 7 104. Kamimura, Y., Tang, M. & Devreotes, P. Assays for chemotaxis and chemoattractant-  
8 stimulated TorC2 activation and PKB substrate phosphorylation in Dictyostelium. *Methods Mol.*  
9 *Biol.* **571**, 255-270 (2009).
- 10 105. de la Cova, C., Townley, R., Regot, S. & Greenwald, I. A Real-Time Biosensor for ERK  
11 Activity Reveals Signaling Dynamics during *C. elegans* Cell Fate Specification. *Dev. Cell.* **42**,  
12 542-553.e4 (2017).
- 13 106. Regot, S., Hughey, J. J., Bajar, B. T., Carrasco, S. & Covert, M. W. High-sensitivity  
14 measurements of multiple kinase activities in live single cells. *Cell* **157**, 1724-1734 (2014).

15
